# Supplementary material for: Base catalysed synthesis of thiochromans and azo-linked chromenes using allenylphosphonates
Source: Royal Society of Chemistry journal article supplement (doi:10.1039/c2ob26285a), 2012-01-01
Supplement: c2ob26285a.pdf [file c2ob26285a.pdf]

## Base catalysed synthesis of thiochromans and azo-linked chromenes using allenylphosphonates

**M. Phani Pavan, M. Nagarjuna Reddy, N. N. Bhuvan Kumar and K. C. Kumara Swamy\***

*School of Chemistry, University of Hyderabad, Hyderabad 500 046, A. P., India. Fax:*

*(+91)-40-23012460; Tel: (+91)-40-231348560; E-mail: [kckssc@uohyd.ernet.in](mailto:kckssc@uohyd.ernet.in), [kckssc@yahoo.com](mailto:kckssc@yahoo.com)*

|          |                                                       |                |
|----------|-------------------------------------------------------|----------------|
| <b>1</b> | <b>General experimental conditions</b>                | <b>S2</b>      |
| <b>2</b> | <b>Experimental details of compounds 8-43</b>         | <b>S3-S25</b>  |
| <b>3</b> | <b>Crystal data for the compounds</b>                 | <b>S25-26</b>  |
| <b>4</b> | <b>Figure S1. An ORTEP diagram of compound (E)-16</b> | <b>S26</b>     |
| <b>5</b> | <b>Figures S2 – S57. Copies of NMR spectra</b>        | <b>S27-S83</b> |
| <b>6</b> | <b>Reference</b>                                      | <b>S83</b>     |

### General experimental details

Chemicals were purified when required according to standard procedures.<sup>1</sup> All reactions, unless stated otherwise, were performed in a dry nitrogen atmosphere. <sup>1</sup>H, <sup>13</sup>C and <sup>31</sup>P NMR spectra were recorded using a 400 MHz spectrometer in CDCl<sub>3</sub> (unless stated otherwise) with shifts referenced to SiMe<sub>4</sub> ( $\delta = 0$ ) or 85 % H<sub>3</sub>PO<sub>4</sub> ( $\delta = 0$ ). Infrared spectra were recorded neat or by using KBr pellets on an FT/IR spectrometer. Melting points were determined by using a local hot-stage melting point apparatus and are uncorrected. Microanalyses were performed using a CHNS analyzer. For TLC, glass microslides were coated with silica-gel-GF<sub>254</sub> (mesh size 75 $\mu$ ) and spots were identified using iodine or UV chamber as appropriate. For column chromatography, silica gel of 100-200 mesh size was used. LC-MS and HRMs equipment was used to record mass spectra for isolated compounds where appropriate. LC-MS data were obtained using electrospray ionization (positive mode) on a C-18 column at a flow rate 0.2 mL/ min using MeOH/water (90:10) as eluent.

## Synthesis of thiochromans 8,9 and 11-31

### Compound 8

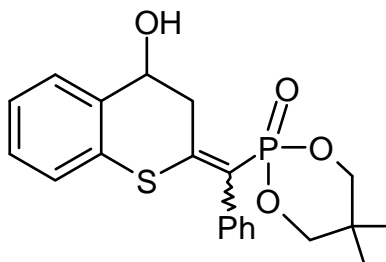

### Compound (Z)-8 (isomeric purity ~95%)

White solid, yield 0.09 g (23%). Mp 144-148 °C; IR (KBr)  $\nu$  3299, 1557, 1472, 1441, 1236, 1053, 1007  $\text{cm}^{-1}$ ;  $^1\text{H}$  NMR (400 MHz,  $\text{CDCl}_3$ )  $\delta$  (ppm) 7.15-7.40 (m, 9H), 4.73-4.74 (m, 1H), 3.98-4.07 (m, 2H), 3.51-3.67 (m, 2H), 2.84-2.90 (m, 1H), 2.61-2.67 (m, 1H), 1.02 (s, 3H), 0.62 (s, 3H). The OH peak was broad;  $^{13}\text{C}$  NMR (100 MHz,  $\text{CDCl}_3$ )  $\delta$  (ppm) 151.5 (d,  $J(\text{PC}) = 8.5$  Hz), 136.5 (d,  $J(\text{PC}) = 8.8$  Hz), 130.7, 130.1, 128.6, 127.8, 127.0, 126.5, 126.0, 122.8 (d,  $J(\text{PC}) = 182.7$  Hz), 75.7, 67.8, 38.5 (d,  $J(\text{PC}) = 14.7$  Hz), 32.3 (d,  $J(\text{PC}) = 6.2$  Hz), 21.7, 21.1;  $^{31}\text{P}$  NMR (80 MHz,  $\text{CDCl}_3$ )  $\delta$  (ppm) 9.8; LC/MS  $m/z$ : 385  $[\text{M}-18+\text{H}]^+$ .

### Compound (E)-8

White solid, yield 0.22 g (57%). Mp 244-248 °C; IR (KBr)  $\nu$  3302, 1557, 1472, 1235, 1119, 1053, 1007  $\text{cm}^{-1}$ ;  $^1\text{H}$  NMR (400 MHz,  $\text{CDCl}_3$ )  $\delta$  (ppm) 7.01-7.47 (m, 9H), 4.95-4.96 (m, 1H) 4.01-4.06 (m, 2H), 3.81-3.87 (m, 1H), 3.57-3.63 (m, 2H), 3.47-3.53 (m, 1H), 3.11 (br, 1H), 0.98 (s, 3H), 0.64 (s, 3H);  $^{13}\text{C}$  NMR (100 MHz,  $\text{CDCl}_3$ )  $\delta$  (ppm) 155.7 (d,  $J(\text{PC}) = 21.0$  Hz), 136.7, 135.5 (d,  $J(\text{PC}) = 8.2$  Hz), 130.0 (d,  $J(\text{PC}) = 4.5$  Hz), 129.7, 128.5, 128.1, 127.8, 126.3, 125.9, 125.6, 120.8 (d,  $J(\text{PC}) = 187.1$  Hz), 75.7 (d,  $J(\text{PC}) = 5.3$  Hz), 67.0, 37.4 (d,  $J(\text{PC}) = 5.4$  Hz), 31.9 (d,  $J(\text{PC}) = 6.3$  Hz), 21.1, 20.3;  $^{31}\text{P}$  NMR (80 MHz,  $\text{CDCl}_3$ )  $\delta$  (ppm) 9.0; LC/MS  $m/z$ : 402  $[\text{M}]^+$ ; HRMS (ESI) calcd. for  $\text{C}_{21}\text{H}_{23}\text{O}_4\text{PSNa}$   $[\text{M} + \text{Na}]^+$  425.0953, found 425.0953. Anal. Calcd. for  $\text{C}_{21}\text{H}_{23}\text{O}_4\text{PS}$ : C, 62.67; H, 5.76 Found: C, 62.61; H, 5.79. X-ray structure was determined for this sample.

## Compound 9

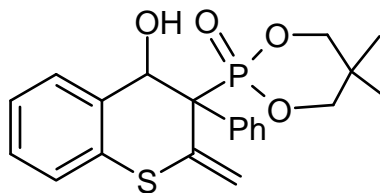

White solid, yield 0.12 g (38%). Mp 236-240 °C; IR (KBr)  $\nu$  3221, 1588, 1468, 1238, 1067, 1013, 897  $\text{cm}^{-1}$ ;  $^1\text{H}$  NMR (400 MHz,  $\text{CDCl}_3$ )  $\delta$  (ppm) 7.13-7.47 (m, 9H), 5.81 (d, 1H,  $J = 4.0$  Hz), 5.68 (d, 1H,  $J = 4.0$  Hz), 5.56 (d, 1H,  $J = 8.0$  Hz), 4.67 (s, 1H), 4.16-4.29 (m, 2H), 3.53-3.91 (dt, 2H), 1.14 (s, 3H), 0.86 (s, 3H);  $^{13}\text{C}$  NMR (100 MHz,  $\text{CDCl}_3 + 5\%$  MeOH)  $\delta$  (ppm) 139.3, 136.5, 136.4, 134.1, 130.7, 130.5, 127.4, 127.2, 126.2, 125.1, 124.4, 116.4, 77.8 (d,  $J(\text{PC}) = 7.7$  Hz), 73.3, 59.3 (d,  $J(\text{PC}) = 135.6$  Hz), 32.4 (d,  $J(\text{PC}) = 8.6$  Hz), 21.6, 20.6;  $^{31}\text{P}$  NMR (80 MHz,  $\text{CDCl}_3$ )  $\delta$  (ppm) 20.3; LC/MS  $m/z$ : 403  $[\text{M} + \text{H}]^+$ ; Anal. Calcd. for  $\text{C}_{21}\text{H}_{23}\text{O}_4\text{PS}$ : C, 62.67; H, 5.76. Found: C, 62.48; H, 5.81. X-ray structure was determined for this sample.

## Compound 10

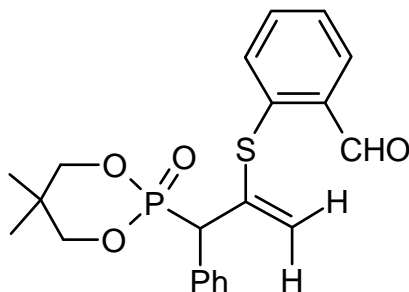

White solid, yield 0.05 g (16%). Mp 136-140 °C; IR (KBr)  $\nu$  1692, 1584, 1478, 1260, 1057, 1009  $\text{cm}^{-1}$ ;  $^1\text{H}$  NMR (400 MHz,  $\text{CDCl}_3$ )  $\delta$  (ppm) 10.2 (s, 1H), 7.26-7.92 (m, 9H), 6.22 (s, 1H), 5.50 (s, 1H), 4.09-4.18 (m, 2H), 3.97 (d, 1H,  $J(\text{PH}) = 24.4$  Hz), 3.58-3.69 (m, 2H), 0.97 (s, 3H), 0.66 (s, 3H);  $^{13}\text{C}$  NMR (100 MHz,  $\text{CDCl}_3$ )  $\delta$  (ppm) 191.4, 139.0, 136.8, 136.1, 134.4, 133.5, 130.0, 129.6, 129.5, 128.7, 128.6, 128.1, 122.2, 75.9, 50.1 (d,  $J(\text{PC}) = 133.0$  Hz), 32.6 (d,  $J(\text{PC}) = 7.0$  Hz), 21.5, 21.3;  $^{31}\text{P}$  NMR (80 MHz,  $\text{CDCl}_3$ )  $\delta$  (ppm) 17.3; LC/MS  $m/z$ : 403  $[\text{M} + \text{H}]^+$ .

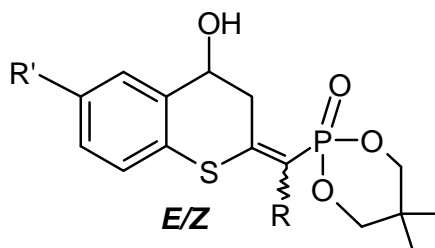

|                                                              |             |                                                               |      |
|--------------------------------------------------------------|-------------|---------------------------------------------------------------|------|
| R' = H, R = 4-Me-C <sub>6</sub> H <sub>4</sub>               | (11)        | R' = Me, R = Ph                                               | (17) |
| R' = H, R = 4-MeO-C <sub>6</sub> H <sub>4</sub>              | (12, X-ray) | R' = Me, R = 4-Me-C <sub>6</sub> H <sub>4</sub>               | (18) |
| R' = H, R = 4-Cl-C <sub>6</sub> H <sub>4</sub>               | (13)        | R' = Me, R = 4-MeO-C <sub>6</sub> H <sub>4</sub>              | (19) |
| R' = H, R = 4-NO <sub>2</sub> -C <sub>6</sub> H <sub>4</sub> | (14)        | R' = Me, R = 4-Cl-C <sub>6</sub> H <sub>4</sub>               | (20) |
| R' = H, R = 1-Naphthyl                                       | (15)        | R' = Me, R = 4-NO <sub>2</sub> -C <sub>6</sub> H <sub>4</sub> | (21) |
| R' = H, R = Me                                               | (16, X-ray) | R' = Me, R = 1-Naphthyl                                       | (22) |
|                                                              |             | R' = Me, R = Me                                               | (23) |

### Compound (Z)-11

White solid, yield 0.05 g (18%). Mp 186-190 °C; IR (KBr)  $\nu$  3391, 1572, 1508, 1472, 1439, 1233 cm<sup>-1</sup>; <sup>1</sup>H NMR (400 MHz, CDCl<sub>3</sub>)  $\delta$  (ppm) 7.15-7.39 (m, 8H), 4.72-4.74 (m, 1H), 3.96-4.06 (m, 2H), 3.52-3.68 (m, 2H), 2.86-2.93 (m, 1H), 2.61-2.66 (m, 1H), 2.37 (s, 3H), 1.04 (s, 3H), 0.68 (s, 3H); <sup>13</sup>C NMR (100 MHz, CDCl<sub>3</sub>)  $\delta$  (ppm) 151.3 (d,  $J(\text{PC}) = 8.0$  Hz), 137.6, 137.0, 133.4 (d,  $J(\text{PC}) = 8.0$  Hz), 130.6, 130.4, 129.3, 128.4, 126.8, 126.4, 126.0, 122.6 (d,  $J(\text{PC}) = 180.0$  Hz), 75.9 (d,  $J(\text{PC}) = 6.0$  Hz), 67.8, 38.6 (d,  $J(\text{PC}) = 15.0$  Hz), 32.3 (d,  $J(\text{PC}) = 7.0$  Hz), 21.8, 21.3, 21.0; <sup>31</sup>P NMR (80 MHz, CDCl<sub>3</sub>)  $\delta$  (ppm) 9.7; LC/MS  $m/z$ : 417 [M+ H]<sup>+</sup>; Anal. Calcd. for C<sub>22</sub>H<sub>25</sub>O<sub>4</sub>PS: C, 63.45; H, 6.05. Found: C, 63.55; H, 6.10.

### Compound (E)-11

White solid, yield 0.18 g (60%). Mp 252-256 °C; IR (KBr)  $\nu$  3312, 1557, 1507, 1470, 1233, 1057, 1009 cm<sup>-1</sup>; <sup>1</sup>H NMR (400 MHz, CDCl<sub>3</sub>)  $\delta$  (ppm) 7.02-7.48 (m, 8H), 4.94-4.96 (m, 1H), 3.98-4.04 (m, 2H), 3.81-3-3.88 (m, 1H), 3.58-3.65 (m, 2H), 3.42-3.47 (m, 1H), 2.40 (s, 3H), 1.01 (s, 3H), 0.68 (s, 3H); <sup>13</sup>C NMR (100 MHz, CDCl<sub>3</sub>)  $\delta$  (ppm) 154.5 (d,  $J(\text{PC}) = 21.8$  Hz), 138.2, 136.3, 133.0 (d,  $J(\text{PC}) = 8.1$  Hz), 130.6, 130.1 (d,  $J(\text{PC}) = 4.5$  Hz), 129.4, 128.3, 127.5, 125.9, 122.9 (d,  $J(\text{PC}) = 185.6$  Hz), 75.7 (d,  $J(\text{PC}) = 6.9$  Hz), 67.8, 37.5 (d,  $J(\text{PC}) = 5.3$  Hz), 32.3 (d,  $J(\text{PC}) = 6.4$  Hz), 21.7, 21.4, 21.0; <sup>31</sup>P NMR (80 MHz, CDCl<sub>3</sub>)  $\delta$  (ppm)  $\delta$  9.2; LC/MS  $m/z$ : 417 [M+ H]<sup>+</sup>; Anal. Calcd. for

C<sub>22</sub>H<sub>25</sub>O<sub>4</sub>PS: C, 63.45; H, 6.05. Found: C, 63.51; H, 6.03

### Compound (Z)-12

White solid, yield 0.04 g (13%). Mp 174-176 °C; IR (KBr)  $\nu$  3308, 1696, 1539, 1250, 1055, 1007 cm<sup>-1</sup>; <sup>1</sup>H NMR (400 MHz, CDCl<sub>3</sub>)  $\delta$  (ppm) 6.84-7.43 (m, 8H), 4.70-4.72 (m, 1H), 3.88-4.01 (m, 2H), 3.80 (s, 3H), 3.47-3.68 (m, 2H), 2.76-2.79 (m, 1H), 2.67-2.72 (m, 1H), 1.03 (s, 3H), 0.67 (s, 3H); <sup>13</sup>C NMR (100 MHz, CDCl<sub>3</sub>)  $\delta$  (ppm) 159.1, 151.7 (d,  $J(\text{PC}) = 9.3$  Hz), 137.1, 131.6, 130.7, 128.6 (d,  $J(\text{PC}) = 8.3$  Hz), 128.4, 126.8, 126.4, 126.0, 122.1 (d,  $J(\text{PC}) = 181.7$  Hz), 114.0, 75.8 (d,  $J(\text{PC}) = 5.0$  Hz), 67.8, 55.3, 38.7 (d,  $J(\text{PC}) = 14.4$  Hz), 32.6 (d,  $J(\text{PC}) = 6.4$  Hz), 21.8, 21.1; <sup>31</sup>P NMR (80 MHz, CDCl<sub>3</sub>)  $\delta$  (ppm) 9.9; LC/MS  $m/z$ : 432 [M]<sup>+</sup>; Anal. Calcd. for C<sub>22</sub>H<sub>25</sub>O<sub>5</sub>PS: C, 61.10; H, 5.83. Found: C, 61.22; H, 5.85. X-ray structure was determined for this sample.

### Compound (E)-12

White solid, yield 0.19 g (66%). Mp 212-214 °C; IR (KBr)  $\nu$  3328, 1605, 1562, 1505, 1233, 1057, 1007 cm<sup>-1</sup>; <sup>1</sup>H NMR (400 MHz, CDCl<sub>3</sub>)  $\delta$  (ppm) 6.94-7.48 (m, 8H), 4.93-4.95 (m, 1H), 4.00-4.05 (m, 2H), 3.85 (s, 3H), 3.78-3.83 (m, 1H), 3.58-3.64 (m, 2H), 3.45-3.50 (m, 1H), 1.00 (s, 3H), 0.67 (s, 3H); <sup>13</sup>C NMR (100 MHz, CDCl<sub>3</sub>)  $\delta$  (ppm) 159.5<sub>0</sub>, 159.4<sub>8</sub>, 155.3 (d,  $J(\text{PC}) = 23.0$  Hz), 136.6, 131.6 (d,  $J(\text{PC}) = 4.0$  Hz), 130.6, 128.2 (d,  $J(\text{PC}) = 6.0$  Hz), 127.3, 126.0, 125.9, 122.1 (d,  $J(\text{PC}) = 187.0$  Hz), 114.1, 75.6 (d,  $J(\text{PC}) = 5.0$  Hz), 67.7, 55.2, 37.5 (d,  $J(\text{PC}) = 5.0$  Hz), 32.3 (d,  $J(\text{PC}) = 6.0$  Hz), 21.7, 21.1; <sup>31</sup>P NMR (80 MHz, CDCl<sub>3</sub>)  $\delta$  (ppm) 9.4; LC/MS  $m/z$ : 432 [M]<sup>+</sup>; Anal. Calcd. for C<sub>22</sub>H<sub>25</sub>O<sub>5</sub>PS: C, 61.10; H, 5.83. Found: C, 61.25; H, 5.80. X-ray structure was determined for this sample.

### Compound (Z)-13

White solid, yield 0.05 g (18%). Mp 158-162 °C; IR (KBr)  $\nu$  3400, 1701, 1460, 1262, 1092, 1057, 1013 cm<sup>-1</sup>; <sup>1</sup>H NMR (400 MHz, CDCl<sub>3</sub>)  $\delta$  (ppm) 7.19-7.40 (m, 8H), 4.73-4.75 (m, 1H), 4.02-4.12 (m, 2H), 3.53-3.69 (m, 2H), 2.84-2.87 (m, 1H), 2.59-2.63 (m, 1H), 1.00 (s, 3H), 0.69 (s, 3H); <sup>13</sup>C NMR (100 MHz, CDCl<sub>3</sub>)  $\delta$  (ppm) 152.7 (d,  $J(\text{PC}) =$

8.6 Hz), 136.4, 135.0 (d,  $J(\text{PC}) = 8.4$  Hz), 133.9 (d,  $J(\text{PC}) = 2.4$  Hz), 131.9, 130.5, 128.8, 128.7, 127.0, 126.5, 126.1, 121.2 (d,  $J(\text{PC}) = 183.7$  Hz), 75.6 (d,  $J(\text{PC}) = 6.3$  Hz), 67.7, 38.5 (d,  $J(\text{PC}) = 14.5$  Hz), 32.3 (d,  $J(\text{PC}) = 6.1$  Hz), 21.6, 21.1;  $^{31}\text{P}$  NMR (80 MHz,  $\text{CDCl}_3$ )  $\delta$  (ppm)  $\delta$  9.8; LC/MS  $m/z$ : 419  $[\text{M}-18]^+$  and 421  $[\text{M}-18+2\text{H}]^+$ ; Anal. Calcd. for  $\text{C}_{21}\text{H}_{22}\text{O}_4\text{CIPS}$ : C, 57.73; H, 5.08. Found: C, 57.65; H, 5.12.

### Compound (E)-13

White solid, yield: 0.18 g (62%); Mp 226-230 °C; IR (KBr)  $\nu$  3324, 1555, 1480, 1346, 1236, 1055, 1009  $\text{cm}^{-1}$ ;  $^1\text{H}$  NMR (400 MHz,  $\text{CDCl}_3$ )  $\delta$  (ppm) 7.03-7.48 (m, 8H), 4.94-4.96 (m, 1H), 4.08-4.13 (m, 2H), 3.86-3.93 (m, 1H), 3.58-3.65 (m, 2H), 3.43-3.48 (m, 1H), 0.96 (s, 3H), 0.69 (s, 3H);  $^{13}\text{C}$  NMR (100 MHz,  $\text{CDCl}_3$ )  $\delta$  (ppm) 157.3 (d,  $J(\text{PC}) = 21.6$  Hz), 136.8, 134.4, 134.3 (d,  $J(\text{PC}) = 8.0$  Hz), 131.8 (d,  $J(\text{PC}) = 4.0$  Hz), 129.7, 129.0, 128.2, 126.8, 126.3, 125.8, 119.8 (d,  $J(\text{PC}) = 191.0$  Hz), 75.6 (d,  $J(\text{PC}) = 5.9$  Hz), 75.5<sub>6</sub> (d,  $J(\text{PC}) = 5.8$  Hz), 67.2, 37.6, 32.3 (d,  $J(\text{PC}) = 6.1$  Hz), 21.4, 21.0;  $^{31}\text{P}$  NMR (80 MHz,  $\text{CDCl}_3$ )  $\delta$  (ppm) 9.2; LC/MS  $m/z$ : 419  $[\text{M}-18]^+$  and 421  $[\text{M}-18+2\text{H}]^+$ ; Anal. Calcd. for  $\text{C}_{21}\text{H}_{22}\text{O}_4\text{CIPS}$ : C, 57.73; H, 5.08 Found: C, 57.85; H, 5.01.

### Compound (E)-14

(The *Z*-isomer was only a minor product and hence not isolated)

White solid, yield 0.18 g (63%). Mp 250-254 °C; IR (KBr)  $\nu$  3322, 1734, 1653, 1238, 1055  $\text{cm}^{-1}$ ;  $^1\text{H}$  NMR (400 MHz,  $\text{CDCl}_3$ )  $\delta$  (ppm) 7.03-7.48 (m, 8H), 4.94-4.96 (m, 1H), 4.08-4.13 (m, 2H), 3.87-3.92 (m, 1H), 3.58-3.65 (m, 2H), 3.43-3.47 (m, 1H), 0.96 (s, 3H), 0.69 (s, 3H);  $^{13}\text{C}$  NMR (100 MHz,  $\text{CDCl}_3$ )  $\delta$  (ppm) 157.3 (d,  $J(\text{PC}) = 21.4$  Hz), 136.8, 134.4, 134.2 (d,  $J(\text{PC}) = 8.1$  Hz), 131.8 (d,  $J(\text{PC}) = 3.9$  Hz), 129.6, 129.0, 128.2, 126.7, 126.3, 125.8, 119.7 (d,  $J(\text{PC}) = 190.5$  Hz), 75.6 (d,  $J(\text{PC}) = 6.0$  Hz), 67.2, 37.6 (d,  $J(\text{PC}) = 4.6$  Hz), 32.3 (d,  $J(\text{PC}) = 6.0$  Hz), 21.3, 21.0;  $^{31}\text{P}$  NMR (80 MHz,  $\text{CDCl}_3$ )  $\delta$  (ppm) 9.2; LC/MS  $m/z$ : 421  $[\text{M}-18+\text{H}]^+$ ; Anal. Calcd. for  $\text{C}_{21}\text{H}_{22}\text{NO}_6\text{PS}$ : C, 56.37; H, 4.96; N, 3.13. Found: C, 56.38; H, 4.85; N, 3.07.

### Compound (E/Z)-15

White solid, yield 0.20 g (68%). Mp 206-210 °C; IR (KBr)  $\nu$  3312, 1574, 1447, 1198, 1051, 997  $\text{cm}^{-1}$ ;  $^1\text{H}$  NMR (400 MHz,  $\text{CDCl}_3$ )  $\delta$  (ppm) 6.89-8.07 (m, 11H), 5.02-5.06 (m,

1H), 4.01-4.05 (m, 1H), 3.88-4.00 (m, 2H), 3.54-3.60 (m, 1H), 3.32-3.40 (m, 2H), 0.92 (s, 3H), 0.48 (s, 3H);  $^{13}\text{C}$  NMR (100 MHz,  $\text{CDCl}_3$ )  $\delta$  (ppm) 136.6, 133.8, 133.5, 131.6, 130.4, 129.0, 128.7, 128.5, 128.3, 128.1, 127.2, 126.8, 126.6, 126.2, 126.0, 125.9, 125.7, 125.5, 125.3, 119.8, 75.6, 67.9, 37.7, 32.3, 21.6, 21.0;  $^{31}\text{P}$  NMR (80 MHz,  $\text{CDCl}_3$ )  $\delta$  (ppm) 9.2 and 9.0 (5:2); LC/MS  $m/z$ : 452  $[\text{M}]^+$ ; Anal. Calcd. for  $\text{C}_{25}\text{H}_{25}\text{O}_4\text{PS}$ : C, 66.36; H, 5.57. Found: C, 66.41; H, 5.52.

### Compound (E)-16

The *Z*-isomer was not observed in the reaction mixture ( $^{31}\text{P}$  NMR).

White solid, yield 0.29 g (86%). Mp 168-172 °C; IR (KBr)  $\nu$  3295, 1572, 1472, 1447, 1217, 1196, 1047, 992  $\text{cm}^{-1}$ ;  $^1\text{H}$  NMR (400 MHz,  $\text{CDCl}_3$ )  $\delta$  (ppm) 7.18-7.47 (m, 4H), 4.86-4.89 (m, 1H), 4.22-4.28 (m, 2H), 3.78-3.89 (m, 2H), 3.64-3.70 (m, 1H), 3.23-3.28 (m, 1H), 2.07-2.10 (dd,  $J = 13.4$  and  $1.2$  Hz, 3H), 1.15 (s, 3H), 1.04 (s, 3H);  $^{13}\text{C}$  NMR (100 MHz,  $\text{CDCl}_3$ )  $\delta$  (ppm) 150.5 (d,  $J(\text{PC}) = 20.4$  Hz), 136.9, 129.8, 128.3, 127.4, 126.1<sub>2</sub>, 126.0<sub>7</sub>, 114.7 (d,  $J(\text{PC}) = 185.1$  Hz), 75.0 (d,  $J(\text{PC}) = 4.8$  Hz), 67.7, 37.7 (d,  $J(\text{PC}) = 6.1$  Hz), 32.5 (d,  $J(\text{PC}) = 5.6$  Hz), 21.8, 21.6, 16.5 (d,  $J(\text{PC}) = 9.2$  Hz);  $^{31}\text{P}$  NMR (80 MHz,  $\text{CDCl}_3$ )  $\delta$  (ppm) 14.9; LC/MS  $m/z$ : 341  $[\text{M}+\text{H}]^+$ . X-ray structure was determined for this sample (see Fig. S1 in Supporting Information).

### Compound (Z)-17

White solid, yield 0.06 g (18%). Mp 182-186 °C; IR (KBr)  $\nu$  3376, 1684, 1543, 1474, 1262, 1061  $\text{cm}^{-1}$ ;  $^1\text{H}$  NMR (400 MHz,  $\text{CDCl}_3$ )  $\delta$  (ppm) 7.06-7.39 (m, 8H), 4.69-4.70 (m, 1H), 3.98-4.06 (m, 2H), 3.50-3.67 (m, 2H), 2.84-2.90 (m, 1H), 2.59-2.64 (m, 1H), 2.32 (s, 3H), 1.01 (s, 3H), 0.64 (s, 3H);  $^{13}\text{C}$  NMR (100 MHz,  $\text{CDCl}_3$ )  $\delta$  (ppm) 152.0 (d,  $J(\text{PC}) = 8.0$  Hz), 136.7 (d,  $J(\text{PC}) = 8.0$  Hz), 136.4, 136.0, 130.7, 129.4, 128.6, 127.8, 127.7, 127.2, 126.5, 122.4 (d,  $J(\text{PC}) = 182.0$  Hz), 75.8 (d,  $J(\text{PC}) = 3.0$  Hz), 75.7 (d,  $J(\text{PC}) = 2.0$  Hz), 68.0, 38.8 (d,  $J(\text{PC}) = 15.0$  Hz), 32.3 (d,  $J(\text{PC}) = 6.0$  Hz), 21.8, 21.0<sub>8</sub>, 21.0<sub>6</sub>;  $^{31}\text{P}$  NMR (80 MHz,  $\text{CDCl}_3$ )  $\delta$  (ppm) 9.7; LC/MS  $m/z$ : 417  $[\text{M}+\text{H}]^+$ ; Anal. Calcd. for  $\text{C}_{22}\text{H}_{25}\text{O}_4\text{PS}$ : C, 63.45; H, 6.05. Found: C, 63.56; H, 6.11.

### Compound (E)-17



White solid, yield 0.19 g (61%). Mp 220-224 °C; IR (KBr)  $\nu$  3283, 1561, 1472, 1204, 1121, 1049, 1003  $\text{cm}^{-1}$ ;  $^1\text{H}$  NMR (400 MHz,  $\text{CDCl}_3$ )  $\delta$  (ppm) 6.91-7.44 (m, 8H), 4.91-4.93 (m, 1H), 4.01-4.06 (m, 2H), 3.83-3.89 (m, 1H), 3.56-3.63 (m, 2H), 3.43-3.48 (m, 1H), 2.31 (s, 3H), 0.98 (s, 3H), 0.64 (s, 3H);  $^{13}\text{C}$  NMR (100 MHz,  $\text{CDCl}_3$ )  $\delta$  (ppm) 155.7 (d,  $J(\text{PC}) = 22.0$  Hz), 136.5, 136.3 (d,  $J(\text{PC}) = 7.9$  Hz), 135.9, 130.4 (d,  $J(\text{PC}) = 4.4$  Hz), 129.0, 128.6, 128.2, 127.9 (d,  $J(\text{PC}) = 4.7$  Hz), 126.9, 125.8, 122.0 (d,  $J(\text{PC}) = 177.2$  Hz), 75.6 (d,  $J(\text{PC}) = 3.9$  Hz), 75.5 (d,  $J(\text{PC}) = 3.9$  Hz), 67.8, 37.6 (d,  $J(\text{PC}) = 4.9$  Hz), 32.3 (d,  $J(\text{PC}) = 6.3$  Hz), 21.6, 21.0<sub>3</sub>, 20.9<sub>8</sub>;  $^{31}\text{P}$  NMR (80 MHz,  $\text{CDCl}_3$ )  $\delta$  (ppm) 9.2; LC/MS  $m/z$ : 416  $[\text{M}]^+$ ; Anal. Calcd. for  $\text{C}_{22}\text{H}_{25}\text{O}_4\text{PS}$ : C, 63.45; H, 6.05. Found: C, 63.51; H, 6.01.

### Compound (Z)-18 (~95%)

White solid, yield 0.02 g (7%). Mp 150-154 °C; IR (KBr)  $\nu$  3351, 1696, 1605, 1507, 1464, 1262, 1057, 1009  $\text{cm}^{-1}$ ;  $^1\text{H}$  NMR (400 MHz,  $\text{CDCl}_3$ )  $\delta$  (ppm) 7.06-7.26 (m, 7H), 4.68-4.69 (m, 1H), 3.96-4.05 (m, 2H), 3.52-3.68 (m, 2H), 2.85-2.88 (m, 1H), 2.60-2.64 (m, 1H), 2.37 (s, 3H), 2.32 (s, 3H), 1.04 (s, 3H), 0.68 (s, 3H);  $^{13}\text{C}$  NMR (100 MHz,  $\text{CDCl}_3$ )  $\delta$  (ppm) 151.4 (d,  $J(\text{PC}) = 8.8$  Hz), 137.5, 136.4, 135.8, 134.2, 133.5 (d,  $J(\text{PC}) = 8.3$  Hz), 130.1, 129.2, 127.6, 127.1, 126.3, 122.4 (d,  $J(\text{PC}) = 181.1$  Hz), 75.7 (d,  $J(\text{PC}) = 6.1$  Hz), 67.9, 38.6 (d,  $J(\text{PC}) = 14.7$  Hz), 32.3 (d,  $J(\text{PC}) = 6.4$  Hz), 21.8, 21.2, 21.0;  $^{31}\text{P}$  NMR (80 MHz,  $\text{CDCl}_3$ )  $\delta$  (ppm) 9.8; LC/MS  $m/z$ : 413  $[\text{M}-18+\text{H}]^+$ .

### Compound (E)-18

White solid, yield 0.21 g (69%). Mp 230-234 °C; IR (KBr)  $\nu$  3287, 1564, 1474, 1215, 1196, 1047, 993  $\text{cm}^{-1}$ ;  $^1\text{H}$  NMR (400 MHz,  $\text{CDCl}_3$ )  $\delta$  (ppm) 6.91-7.30 (m, 7H), 4.90-4.91 (m, 1H), 3.97-4.04 (m, 2H), 3.73-3.79 (m, 1H), 3.58-3.64 (m, 2H), 3.45-3.49 (m, 1H), 2.40 (s, 3H), 2.31 (s, 3H), 1.00 (s, 3H), 0.67 (s, 3H);  $^{13}\text{C}$  NMR (100 MHz,  $\text{CDCl}_3$ )  $\delta$  (ppm) 155.2 (d,  $J(\text{PC}) = 21.6$ ), 138.1, 136.5, 135.9, 133.2 (d,  $J(\text{PC}) = 8.0$  Hz), 130.2 (d,  $J(\text{PC}) = 4.3$  Hz), 129.5, 129.0, 128.0, 127.0, 125.9, 122.2 (d,  $J(\text{PC}) = 186.1$  Hz), 75.7 (d,  $J(\text{PC}) = 5.7$  Hz), 67.8, 37.8 (d,  $J(\text{PC}) = 5.2$  Hz), 32.4 (d,  $J(\text{PC}) = 6.2$  Hz), 21.8, 21.5, 21.1;  $^{31}\text{P}$  NMR (80 MHz,  $\text{CDCl}_3$ )  $\delta$  (ppm) 9.4; LC/MS  $m/z$ : 430  $[\text{M}]^+$ ; Anal. Calcd. for  $\text{C}_{23}\text{H}_{27}\text{O}_4\text{PS}$ : C, 64.17; H, 6.32. Found: C, 64.25; H, 6.28.

### Compound (Z)-19

White gummy solid, yield 0.04 g (13%). IR (neat)  $\nu$  3364, 1605, 1543, 1507, 1474, 1250, 1177  $\text{cm}^{-1}$ ;  $^1\text{H}$  NMR (400 MHz,  $\text{CDCl}_3$ )  $\delta$  (ppm) 6.87-7.23 (m, 7H), 4.68-4.69 (m, 1H), 3.93-4.02 (m, 2H), 3.82 (s, 3H), 3.51-3.68 (m, 2H), 2.81-2.87 (m, 1H), 2.63-2.67 (m, 1H), 2.31 (s, 3H), 1.04 (s, 3H), 0.68 (s, 3H);  $^{13}\text{C}$  NMR (100 MHz,  $\text{CDCl}_3$ )  $\delta$  (ppm) 159.1, 151.8 (d,  $J(\text{PC}) = 9.2$  Hz), 136.5, 135.9, 132.1 (d,  $J(\text{PC}) = 10.0$  Hz), 131.8, 131.3, 129.3, 128.7 (d,  $J(\text{PC}) = 8.1$  Hz), 127.7, 127.2, 126.4, 122.0 (d,  $J(\text{PC}) = 181.7$  Hz), 114.0, 75.8, 68.0, 55.3, 38.7 (d,  $J(\text{PC}) = 14.4$  Hz), 32.4 (d,  $J(\text{PC}) = 6.2$  Hz), 21.8, 21.1;  $^{31}\text{P}$  NMR (80 MHz,  $\text{CDCl}_3$ )  $\delta$  (ppm) 10.3; LC/MS  $m/z$ : 447  $[\text{M}+\text{H}]^+$ ; Anal. Calcd. for  $\text{C}_{23}\text{H}_{27}\text{O}_5\text{PS}$ : C, 61.87; H, 6.10. Found: C, 61.75; H, 6.14.

### Compound (E)-19

White solid, yield 0.20 g (65%). Mp 232-236  $^\circ\text{C}$ ; IR (KBr)  $\nu$  3277, 1605, 1562, 1505, 1246, 1202, 999  $\text{cm}^{-1}$ ;  $^1\text{H}$  NMR (400 MHz,  $\text{CDCl}_3$ )  $\delta$  (ppm) 6.92-7.29 (m, 7H), 4.90-4.91 (m, 1H), 4.00-4.05 (m, 2H), 3.85 (s, 3H), 3.79-4.05 (m, 1H), 3.58-3.64 (m, 2H), 3.42-3.47 (m, 1H), 2.31 (s, 3H), 1.00 (s, 3H), 0.67 (s, 3H);  $^{13}\text{C}$  NMR (100 MHz,  $\text{CDCl}_3$ )  $\delta$  (ppm) 159.5, 155.7 (d,  $J(\text{PC}) = 22.6$  Hz), 136.4, 135.9, 131.7 (d,  $J(\text{PC}) = 4.4$  Hz), 129.1, 128.4 (d,  $J(\text{PC}) = 8.3$  Hz), 128.1, 127.1, 125.9, 121.9 (d,  $J(\text{PC}) = 187.0$  Hz), 114.1, 75.6 (d,  $J(\text{PC}) = 6.0$  Hz), 67.9, 55.3, 37.7 (d,  $J(\text{PC}) = 5.1$  Hz), 32.4 (d,  $J(\text{PC}) = 6.3$  Hz), 21.7, 21.1, 21.0;  $^{31}\text{P}$  NMR (80 MHz,  $\text{CDCl}_3$ )  $\delta$  (ppm) 9.4; LC/MS  $m/z$ : 445  $[\text{M}-\text{H}]^+$ ; Anal. Calcd. for  $\text{C}_{23}\text{H}_{27}\text{O}_5\text{PS}$ : C, 61.87; H, 6.10. Found: C, 61.95; H, 6.14.

### Compound (Z)-20

White solid, yield 0.04 g (14%). Mp 168-172  $^\circ\text{C}$ ; IR (KBr)  $\nu$  3364, 1686, 1545, 1474, 1260, 1055, 1003  $\text{cm}^{-1}$ ;  $^1\text{H}$  NMR (400 MHz,  $\text{CDCl}_3$ )  $\delta$  (ppm) 7.08-7.40 (m, 7H), 4.70-4.71 (m, 1H), 4.04-4.13 (m, 2H), 3.53-3.69 (m, 2H), 2.83-2.87 (m, 1H), 2.56-2.60 (m, 1H), 2.33 (s, 3H), 1.00 (s, 3H), 0.69 (s, 3H);  $^{13}\text{C}$  NMR (100 MHz,  $\text{CDCl}_3$ )  $\delta$  (ppm) 153.5 (d,  $J(\text{PC}) = 8.7$  Hz), 136.6, 136.1, 135.0 (d,  $J(\text{PC}) = 8.3$  Hz), 133.8, 131.9, 129.3, 128.8, 127.7, 126.7, 126.3, 120.1 (d,  $J(\text{PC}) = 183.6$  Hz), 75.7 (d,  $J(\text{PC}) = 5.8$  Hz), 67.6, 38.8 (d,  $J(\text{PC}) = 14.3$  Hz), 32.4 (d,  $J(\text{PC}) = 6.1$  Hz), 21.6, 21.1, 20.8;  $^{31}\text{P}$  NMR (80 MHz,  $\text{CDCl}_3$ )  $\delta$  (ppm) 10.0; LC/MS  $m/z$ : 451  $[\text{M}]^+$  and 453  $[\text{M}+2\text{H}]^+$ ; Anal. Calcd. for  $\text{C}_{22}\text{H}_{24}\text{ClO}_4\text{PS}$ :

C, 58.60; H, 5.36. Found: C, 58.75; H, 5.26.

### Compound (E)-20

White solid, yield 0.20 g (67%). Mp 218-222 °C; IR (KBr)  $\nu$  3314, 1576, 1564, 1476, 1208, 1047  $\text{cm}^{-1}$ ;  $^1\text{H}$  NMR (400 MHz,  $\text{CDCl}_3$ )  $\delta$  (ppm) 6.91-7.41 (m, 7H), 4.90-4.92 (m, 1H), 4.07-4.12 (m, 2H), 3.84-3.90 (m, 1H), 3.57-3.65 (m, 2H), 3.41-3.45 (m, 1H), 2.32 (s, 3H), 0.96 (s, 3H), 0.68 (s, 3H);  $^{13}\text{C}$  NMR (100 MHz,  $\text{CDCl}_3$ )  $\delta$  (ppm) 156.7 (d,  $J(\text{PC}) = 21.3$  Hz), 136.3, 136.1, 134.7 (d,  $J(\text{PC}) = 7.9$  Hz), 134.3, 131.9 (d,  $J = 4.0$  Hz), 129.1, 129.0, 128.0, 126.6, 125.8, 120.7 (d,  $J(\text{PC}) = 189.6$  Hz), 75.4 (d,  $J(\text{PC}) = 3.8$  Hz), 67.7, 37.5 (d,  $J(\text{PC}) = 4.8$  Hz), 32.3 (d,  $J(\text{PC}) = 5.9$  Hz), 21.5, 21.2, 21.1;  $^{31}\text{P}$  NMR (80 MHz,  $\text{CDCl}_3$ )  $\delta$  (ppm) 9.4; LC/MS  $m/z$ : 433  $[\text{M}-18]^+$  and 435  $[\text{M}-18+2\text{H}]^+$ ; Anal. Calcd. for  $\text{C}_{22}\text{H}_{24}\text{ClO}_4\text{PS}$ : C, 58.60; H, 5.36. Found: C, 58.56; H, 5.41.

### Compound (E)-21

The *Z*-isomer was only a minor product and hence not isolated.

White solid, yield 0.19 g (64%). Mp 244-248 °C; IR (KBr)  $\nu$  3316, 2971, 1576, 1559, 1476, 1208, 1047  $\text{cm}^{-1}$ ;  $^1\text{H}$  NMR (400 MHz,  $\text{CDCl}_3$ )  $\delta$  (ppm) 6.91-7.41 (m, 7H), 4.90-4.92 (m, 1H), 4.07-4.13 (m, 2H), 3.80-3.86 (m, 1H), 3.57-3.65 (m, 2H), 3.45-3.49 (m, 1H), 2.32 (s, 3H), 0.96 (s, 3H), 0.68 (s, 3H);  $^{13}\text{C}$  NMR (100 MHz,  $\text{CDCl}_3$ )  $\delta$  (ppm) 156.8 (d,  $J(\text{PC}) = 21.5$  Hz), 136.3 (d,  $J(\text{PC}) = 8.4$  Hz), 134.7, 134.3, 132.0, 129.2, 129.0, 128.1, 126.6, 125.9, 120.7 (d,  $J(\text{PC}) = 189.7$  Hz), 75.5, 67.8, 37.6, 32.4 (d,  $J(\text{PC}) = 5.8$  Hz), 21.6, 21.2, 21.1;  $^{31}\text{P}$  NMR (80 MHz,  $\text{CDCl}_3$ )  $\delta$  (ppm) 9.4; LC/MS  $m/z$ : 462  $[\text{M}+\text{H}]^+$ ; Anal. Calcd. for  $\text{C}_{22}\text{H}_{24}\text{NO}_6\text{PS}$ : C, 57.26; H, 5.24; N, 3.04. Found: C, 57.18; H, 5.31; N, 3.13.

### Compound (E/Z)-22

White solid, yield 0.20 g (67%). Mp 208-212 °C; IR (KBr)  $\nu$  3297, 1572, 1559, 1476, 1198, 1051, 997  $\text{cm}^{-1}$ ;  $^1\text{H}$  NMR (400 MHz,  $\text{CDCl}_3$ )  $\delta$  (ppm) 6.77-8.07 (m, 10H), 4.98-5.02 (m, 1H), 3.96-4.05 (m, 1H), 3.85-3.93 (m, 2H), 3.54-3.62 (m, 1H), 3.31-3.39 (m, 2H), 2.29 (s, 3H), 0.92 (s, 3H), 0.48 (s, 3H). The other isomer was also present, but no distinct signal except for the one at 0.49 ppm could be observed;  $^{13}\text{C}$  NMR (100 MHz,  $\text{CDCl}_3$ )  $\delta$  (ppm) 156.8, 156.5, 138.6, 136.4, 135.8, 135.6, 133.8, 133.6, 133.5, 131.7,

131.6, 131.3, 129.1, 128.9, 128.8, 128.7<sub>4</sub>, 128.6<sub>8</sub>, 128.6, 128.5, 128.4, 128.3, 127.8, 127.4, 126.8, 126.7, 126.6, 126.3, 126.2, 125.9, 125.8, 125.7, 125.5, 125.3, 120.3 (d,  $J(\text{PC}) = 188.4$  Hz), 75.6 (d,  $J(\text{PC}) = 6.0$  Hz), 68.0, 53.4, 37.9 (d,  $J(\text{PC}) = 4.9$  Hz), 37.5 (d,  $J(\text{PC}) = 5.7$  Hz), 32.3 (d,  $J(\text{PC}) = 6.3$  Hz), 21.6, 20.9<sub>5</sub>, 20.9<sub>1</sub>;  $^{31}\text{P}$  NMR (80 MHz,  $\text{CDCl}_3$ )  $\delta$  (ppm) 9.4 and 9.2 (2:3); LC/MS  $m/z$ : 467  $[\text{M}+\text{H}]^+$ ; Anal. Calcd. for  $\text{C}_{26}\text{H}_{27}\text{O}_4\text{PS}$ : C, 66.94; H, 5.83. Found: C, 66.85; H, 5.87.

### Compound (E)-23

The *Z*-isomer was not observed.

White solid, yield 0.30 g (85%). Mp 204-208 °C; IR (KBr)  $\nu$  3378, 1730, 1698, 1549, 1472, 1262, 1061  $\text{cm}^{-1}$ ;  $^1\text{H}$  NMR (400 MHz,  $\text{CDCl}_3$ )  $\delta$  (ppm) 7.06-7.29 (m, 3H), 4.82-4.85 (m, 1H), 4.21-4.27 (m, 2H), 3.80-3.88 (m, 2H), 3.77-3.80 (m, 1H), 3.23-3.26 (m, 1H), 2.33 (s, 3H), 2.05-2.09 (dd,  $J = 14.0$  and  $1.2$  Hz, 3H), 1.15 (s, 3H), 1.03 (s, 3H);  $^{13}\text{C}$  NMR (100 MHz,  $\text{CDCl}_3$ )  $\delta$  (ppm) 151.2 (d,  $J(\text{PC}) = 20.4$ ), 136.9, 136.1, 129.0, 128.0, 126.2, 126.0, 114.0 (d,  $J(\text{PC}) = 185.4$  Hz), 75.1 (d,  $J(\text{PC}) = 5.9$  Hz), 67.8, 37.9 (d,  $J(\text{PC}) = 6.2$  Hz), 32.5 (d,  $J(\text{PC}) = 5.5$  Hz), 21.8, 21.6, 21.1, 16.5 (d,  $J(\text{PC}) = 9.3$  Hz);  $^{31}\text{P}$  NMR (80 MHz,  $\text{CDCl}_3$ )  $\delta$  15.0; LC/MS  $m/z$ : 354  $[\text{M}]^+$ ; Anal. Calcd. for  $\text{C}_{17}\text{H}_{23}\text{O}_4\text{PS}$ : C, 57.61; H, 6.54. Found: C, 57.68; H, 6.51.

### Compound 24

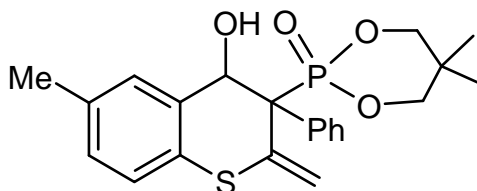

This compound was prepared by a procedure similar to that for **9** by the reaction of allene **1a** with 5-methyl-2-mercapto-benzaldehyde **5** in ethanol using the same molar quantities of the reactants and isolated by column chromatography on silica gel (hexane/ EtOAc; 1:1).

White solid, yield 0.08 g (25%). Mp 202-206 °C; IR (KBr)  $\nu$  3264, 1605, 1480, 1240, 1069, 1005  $\text{cm}^{-1}$ ;  $^1\text{H}$  NMR (400 MHz,  $\text{CDCl}_3$ )  $\delta$  (ppm) 6.97-7.30 (m, 8H), 5.79 (d, 1H,  $J = 5.2$  Hz), 5.64 (d, 1H,  $J = 4.0$  Hz), 5.51 (d, 1H,  $J = 8.4$  Hz), 4.79 (s, 1H), 4.16-4.28 (m,

2H), 3.56-3.91 (dt, 2H), 2.26 (s, 3H), 1.15 (s, 3H), 0.85 (s, 3H);  $^{13}\text{C}$  NMR (100 MHz,  $\text{CDCl}_3$ )  $\delta$  (ppm) 140.7 (d,  $J(\text{PC}) = 7.5$  Hz), 136.4 (d,  $J(\text{PC}) = 12.4$  Hz), 136.0, 135.8, 130.4 (d,  $J(\text{PC}) = 6.9$  Hz), 128.3, 127.5, 127.4, 127.3, 127.2, 125.9, 118.8 (d,  $J(\text{PC}) = 7.8$  Hz), 77.8 (d,  $J(\text{PC}) = 7.7$  Hz), 72.8, 60.4 (d,  $J(\text{PC}) = 132.8$  Hz), 33.0 (d,  $J(\text{PC}) = 8.1$  Hz), 22.0, 21.5, 21.3;  $^{31}\text{P}$  NMR (80 MHz,  $\text{CDCl}_3$ )  $\delta$  (ppm) 20.4; LC/MS  $m/z$ : 417  $[\text{M}+\text{H}]^+$ ; Anal. Calcd. for  $\text{C}_{22}\text{H}_{25}\text{O}_4\text{PS}$ : C, 63.45; H, 6.05. Found: C, 63.34; H, 6.12.

### Compound 25

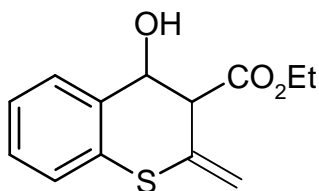

The procedure was the same as above using **2** and **4** at room temperature using the same molar quantities. White solid, yield 0.30 g (84%). Mp 54-56 °C; IR (KBr)  $\nu$  3457, 1732, 1713, 1589, 1445, 1260  $\text{cm}^{-1}$ ;  $^1\text{H}$  NMR (400 MHz,  $\text{CDCl}_3$ )  $\delta$  (ppm) 7.13-7.46 (m, 4H), 5.48 (s, 1H), 5.31 (s, 1H), 5.13 (d,  $J \sim 6.2$  Hz, 1H), 4.11-4.18 (m, 2H), 3.77 (d,  $J \sim 6.2$  Hz, 1H), 1.14 (t,  $J = 7.2$  Hz, 3H);  $^{13}\text{C}$  NMR (100 MHz,  $\text{CDCl}_3$ )  $\delta$  (ppm) 169.6, 134.0, 133.7, 131.0, 129.0, 128.7, 125.7, 125.3, 114.3, 69.8, 61.4, 54.5, 14.0; LC/MS  $m/z$ : 250  $[\text{M}]^+$ ; HRMS (ESI) calcd for  $\text{C}_{13}\text{H}_{14}\text{O}_3\text{SNa}$   $[\text{M} + \text{Na}]^+$  273.0562, found 273.0562. Anal. Calcd. for  $\text{C}_{13}\text{H}_{14}\text{O}_3\text{S}$ : C, 62.38; H, 5.64. Found: C, 62.25; H, 5.68.

### Compound 26

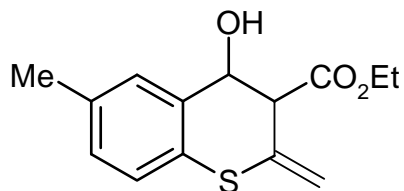

The procedure was the same as above using **2** and **5** at room temperature using the same molar quantities. White solid, yield 0.28 g (85%); Mp 42-46 °C; IR (KBr)  $\nu$  3401, 1732,

1605, 1474, 1370, 1331, 1179  $\text{cm}^{-1}$ ;  $^1\text{H}$  NMR (400 MHz,  $\text{CDCl}_3$ )  $\delta$  (ppm) 7.00-7.27 (m, 3H), 5.46 (s, 1H), 5.29 (s, 1H), 5.06-5.09 (m, 1H), 4.11-4.16 (m, 2H), 3.74 (d,  $J = 8.0$  Hz, 1H), 2.31 (s, 3H), 1.14 (t,  $J = 8.0$  Hz, 3H);  $^{13}\text{C}$  NMR (100 MHz,  $\text{CDCl}_3$ )  $\delta$  (ppm) 169.7, 135.2, 134.3, 133.6, 129.7<sub>4</sub>, 129.6<sub>7</sub>, 127.4, 125.6, 114.2, 70.0, 61.4, 54.7, 21.0, 14.1; LC/MS  $m/z$ : 264  $[\text{M}]^+$ ; Anal. Calcd. for  $\text{C}_{14}\text{H}_{16}\text{O}_3\text{S}$ : C, 63.61; H, 6.10. Found: C, 63.75; H, 6.16.

### Synthesis of phosphono-thiochromene 27

The quantities, procedure and the work up were the same as that for compound [procedure (ii) in the main paper] except that the reaction time was 24 h (instead of 4 h).

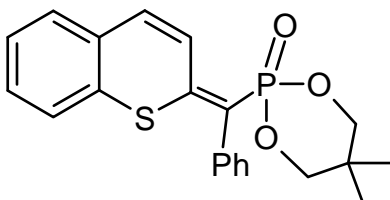

### Compound (*E*)-27 (isomeric purity ~95%)

White solid, yield 0.22 g (70%). Mp 150-154  $^{\circ}\text{C}$ ; IR (KBr)  $\nu$  1611, 1514, 1485, 1385, 1260, 1219, 1057  $\text{cm}^{-1}$ ;  $^1\text{H}$  NMR (400 MHz,  $\text{CDCl}_3$ )  $\delta$  (ppm) 6.85-8.12 (m, 11H), 4.09-4.14 (m, 2H), 3.54-3.61 (m, 2H), 0.92 (s, 3H), 0.60 (s, 3H);  $^{13}\text{C}$  NMR (100 MHz,  $\text{CDCl}_3$ )  $\delta$  (ppm) 152.1 (d,  $J(\text{PC}) = 22.1$  Hz), 136.8 (d,  $J(\text{PC}) = 6.4$  Hz), 133.4, 132.7, 130.4, 129.7, 129.4, 128.7, 128.2, 127.6, 126.1, 124.8, 122.1 (d,  $J(\text{PC}) = 6.6$  Hz), 113.7 (d,  $J(\text{PC}) = 193.5$  Hz), 75.2 (d,  $J(\text{PC}) = 6.0$  Hz), 32.2 (d,  $J(\text{PC}) = 5.8$  Hz), 21.6, 21.1;  $^{31}\text{P}$  NMR (80 MHz,  $\text{CDCl}_3$ )  $\delta$  (ppm) 10.1 (other isomer 12.4 (5%)); LC/MS  $m/z$ : 385  $[\text{M}+\text{H}]^+$ .

### Synthesis of -thiochromene 28-31

These compounds were prepared by a procedure similar to that for **8**] procedure (ii)] by the reaction of allenylsulfones **3a-b** with mercapto-benzaldehyde **4-5** in DMSO using the same molar quantities of the reactants and isolated by column chromatography on silica gel (hexane/ EtOAc; 3:2).

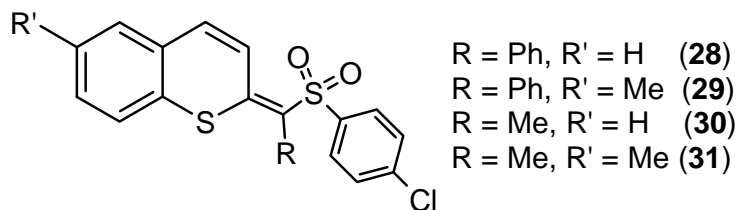

### Compound-28

Yellow solid, yield 0.24 g (77%); Mp 162-164 °C. IR (KBr)  $\nu$  1611, 1514, 1485, 1385, 1260, 1219, 1057  $\text{cm}^{-1}$ ;  $^1\text{H}$  NMR (400 MHz,  $\text{CDCl}_3$ )  $\delta$  (ppm) 8.34 (d,  $J = 10.8$  Hz, 1H), 7.60-7.62 (m, 2H), 7.39-7.43 (m, 5H), 7.30-7.33 (m, 1H), 7.18-7.20 (m, 2H), 7.01-7.07 (m, 4H);  $^{13}\text{C}$  NMR (100 MHz,  $\text{CDCl}_3$ )  $\delta$  (ppm) 147.8, 140.3, 139.5, 134.4, 133.8, 133.3, 132.5, 131.6, 130.1, 129.7, 129.6, 129.4, 129.1, 129.0, 128.9, 128.8, 127.2, 126.6, 124.9, 119.1; LC/MS  $m/z$ : 411, 409  $[\text{M}]^+$ ; Anal. Calcd. for  $\text{C}_{22}\text{H}_{15}\text{ClO}_2\text{S}_2$ : C, 64.30; H, 3.68. Found: C, 64.21; H, 3.72.

### Compound 29

Yellow solid, yield 0.23 g (72%); Mp 140-142 °C. IR (KBr)  $\nu$  1611, 1514, 1485, 1385, 1260, 1219, 1057  $\text{cm}^{-1}$ ;  $^1\text{H}$  NMR (400 MHz,  $\text{CDCl}_3$ )  $\delta$  (ppm) 8.33 (d,  $J = 10.4$  Hz, 1H), 7.61 (d,  $J = 8.4$  Hz, 2H), 7.38-7.42 (m, 5H), 6.92-7.13 (m, 6H), 2.32 (s, 3H);  $^{13}\text{C}$  NMR (100 MHz,  $\text{CDCl}_3$ )  $\delta$  (ppm) 148.2, 140.4, 139.4, 136.5, 134.5, 133.9, 132.5, 131.7, 130.5, 130.4, 130.1, 129.7, 129.5, 129.1, 129.0, 128.9, 127.0, 124.7, 123.6, 119.0, 21.0; LC/MS  $m/z$ : 425, 423  $[\text{M}]^+$ ; HRMS (ESI) calcd for  $\text{C}_{23}\text{H}_{17}\text{ClO}_2\text{S}_2\text{Na}$   $[\text{M} + \text{Na}]^+$  447.0256, found 447.0256. Anal. Calcd. for  $\text{C}_{23}\text{H}_{17}\text{ClO}_2\text{S}_2$ : C, 65.01; H, 4.03. Found: C, 64.12; H, 4.11.

### Compound 30

Yellow solid, yield 0.19 g (73%); Mp 137-139 °C. IR (KBr)  $\nu$  1615, 1520, 1474, 1393, 1308, 1269, 1224, 1142 1084, 804  $\text{cm}^{-1}$ ;  $^1\text{H}$  NMR (400 MHz,  $\text{CDCl}_3$ )  $\delta$  (ppm) 8.11 (d,  $J = 10.8$  Hz, 1H), 7.81-7.83 (m, 2H), 7.48-7.50 (m, 2H), 7.27-7.32 (m, 4H), 6.88 (d,  $J = 11.2$  Hz, 1H), 2.04 (s, 3H);  $^{13}\text{C}$  NMR (100 MHz,  $\text{CDCl}_3$ )  $\delta$  (ppm) 144.6, 140.8, 139.4, 132.6, 132.3, 130.2, 129.6, 129.2, 128.1, 127.4, 126.8, 125.1, 119.5, 118.3, 17.1; LC/MS  $m/z$ : 349, 351  $[\text{M}]^+$ ; Anal. Calcd. for  $\text{C}_{17}\text{H}_{13}\text{ClO}_2\text{S}_2$ : C, 58.53; H, 3.76. Found: C, 58.45; H, 3.81.

### Compound 31

Yellow solid, yield 0.19 g (70%); Mp 172-174 °C. IR (KBr)  $\nu$  1613, 1507, 1476, 1304, 1236, 1134, 1086, 1011, 810  $\text{cm}^{-1}$ ;  $^1\text{H}$  NMR (400 MHz,  $\text{CDCl}_3$ )  $\delta$ (ppm) 8.09 (d,  $J$  = 10.8 Hz, 1H), 7.81-7.83 (m, 2H), 7.47-7.49 (m, 2H), 7.10-7.20 (m, 4H), 6.85 (d,  $J$  = 10.8 Hz, 1H), 2.35 (s, 3H), 2.03 (s, 3H);  $^{13}\text{C}$  NMR (100 MHz,  $\text{CDCl}_3$ )  $\delta$  (ppm) 145.1, 140.9, 139.4, 136.8, 132.4, 130.6, 130.3, 129.5, 129.4, 128.1, 127.3, 124.9, 119.5, 117.7, 21.0, 17.1; LC/MS  $m/z$ : 363, 365  $[\text{M}]^+$ ; Anal. Calcd. for  $\text{C}_{18}\text{H}_{15}\text{ClO}_2\text{S}_2$ : C, 59.58; H, 4.17. Found: C, 59.45; H, 4.23.

### Azo-substituted phosphono-chromans 32-33 [procedure (iii) in the main paper]

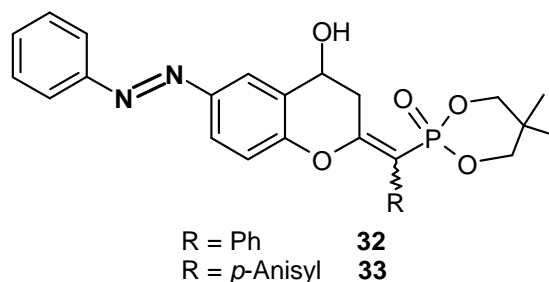

### Compound (*E*)-32

Red solid, yield 0.10 g (27%). Mp 206-208 °C; IR (KBr)  $\nu$  3358, 1644, 1609, 1480, 1235, 1059, 1005  $\text{cm}^{-1}$ ;  $^1\text{H}$  NMR (400 MHz,  $\text{CDCl}_3$ )  $\delta$ (ppm) 7.24-7.95 (m, 13H), 4.88 (m, 1H), 3.69-3.91 (m, 4H), 3.19 (br, 1H), 2.93-2.97 (m, 1H), 2.64-2.67 (m, 1H), 1.20 (s, 3H), 0.79 (s, 3H);  $^{13}\text{C}$  NMR (100 MHz,  $\text{DMSO-d}_6$ )  $\delta$  (ppm) 159.3, 153.3, 152.1, 147.5, 134.2 (d,  $J(\text{PC})$  = 6.2 Hz), 131.5, 129.6 (d,  $J(\text{PC})$  = 4.8 Hz), 129.7, 128.7, 127.8, 127.5, 124.9, 122.6, 122.1, 117.3, 108.3 (d,  $J(\text{PC})$  = 169.1 Hz), 75.9, 61.9, 33.0 (d,  $J(\text{PC})$  = 9.6 Hz), 32.2 (d,  $J(\text{PC})$  = 6.3 Hz), 21.5, 20.2;  $^{31}\text{P}$  NMR (80 MHz,  $\text{CDCl}_3$ )  $\delta$  (ppm) 10.4; LC/MS  $m/z$ : 473  $[\text{M}-18+\text{H}]^+$ ; Anal. Calcd. for  $\text{C}_{27}\text{H}_{27}\text{N}_2\text{O}_5\text{P}$ : C, 66.12; H, 5.55; N, 5.71. Found: C, 66.35; H, 5.48; N, 5.65.

### Compound (*Z*)-32

Red solid, yield 0.20 g (53%). Mp 206-208 °C; IR (KBr)  $\nu$  3310, 1636, 1607, 1483, 1236, 1165, 1057  $\text{cm}^{-1}$ ;  $^1\text{H}$  NMR (400 MHz,  $\text{CDCl}_3$ )  $\delta$ (ppm) 6.86-8.01 (m, 13H), 5.08 (m, 1H),



3.93-4.10 (m, 2H), 3.56-3.71 (m, 2H), 3.30-3.34 (m, 1H), 3.13-3.14 (m, 1H), 0.99 (s, 3H), 0.64 (s, 3H);  $^{13}\text{C}$  NMR (100 MHz, DMSO- $d_6$ )  $\delta$  (ppm) 160.0 (d,  $J(\text{PC}) = 32.2$  Hz), 153.3, 152.3, 147.8, 134.0, 131.9, 130.7, 130.0, 128.6, 128.1, 127.8, 124.9, 122.9, 122.3, 117.5, 108.9 (d,  $J(\text{PC}) = 188.4$  Hz), 75.9 (d,  $J(\text{PC}) = 15.4$  Hz), 62.0, 33.5, 32.2, 21.5, 20.4;  $^{31}\text{P}$  NMR (80 MHz,  $\text{CDCl}_3$ )  $\delta$  (ppm) 14.5; LC/MS  $m/z$ : 473  $[\text{M}-18+\text{H}]^+$ ; Anal. Calcd. for  $\text{C}_{27}\text{H}_{27}\text{N}_2\text{O}_5\text{P}$ : C, 66.12; H, 5.55; N, 5.71. Found: C, 66.35; H, 5.46; N, 5.88.

### Compound (E)-33

Red solid, yield 0.10 g (28%). Mp 206-208 °C; IR (KBr)  $\nu$  3368, 1638, 1605, 1510, 1480, 1244, 1061  $\text{cm}^{-1}$ ;  $^1\text{H}$  NMR (400 MHz,  $\text{CDCl}_3$ )  $\delta$  (ppm) 6.90-7.90 (m, 12H), 4.87 (br m, 1H), 3.85-3.90 (m, 2H), 3.82 (s, 3H), 3.70-3.78 (m, 2H), 2.93-2.94 (m, 1H), 2.63-2.67 (m, 1H), 1.20 (s, 3H), 0.77 (s, 3H);  $^{13}\text{C}$  NMR (100 MHz, DMSO- $d_6$ )  $\delta$  (ppm) 159.5, 159.1, 153.6, 152.3, 147.7, 132.1, 131.8, 130.0, 127.7, 126.3 (d,  $J(\text{PC}) = 5.8$  Hz), 125.2, 122.8, 122.4, 117.5, 114.3, 107.9 (d,  $J(\text{PC}) = 169.1$  Hz), 76.2, 62.0, 55.6, 33.2, 32.1 (d,  $J(\text{PC}) = 5.8$  Hz), 21.8, 20.2;  $^{31}\text{P}$  NMR (80 MHz,  $\text{CDCl}_3$ )  $\delta$  (ppm) 10.9; LC/MS  $m/z$ : 503  $[\text{M}-18+\text{H}]^+$ ; HRMS (ESI) calcd for  $\text{C}_{28}\text{H}_{29}\text{N}_2\text{O}_6\text{PNa}$   $[\text{M} + \text{Na}]^+$  543.1661, found 543.1661. Anal. Calcd. for  $\text{C}_{28}\text{H}_{29}\text{N}_2\text{O}_6\text{P}$ : C, 64.61; H, 5.62; N, 5.38. Found: C, 64.48; H, 5.55; N, 5.45.

### Compound (Z)-33

Red solid, yield 0.16 g (46%). Mp 206-208 °C; IR (KBr)  $\nu$  3306, 1636, 1605, 1510, 1481, 1242, 1177, 1059, 1007  $\text{cm}^{-1}$ ;  $^1\text{H}$  NMR (400 MHz,  $\text{CDCl}_3$ )  $\delta$  (ppm) 6.88-8.02 (m, 12H), 5.07 (m, 1H), 3.99-4.09 (m, 2H), 3.85 (s, 3H), 3.67-3.90 (m, 2H), 3.56-3.62 (m, 1H), 3.32-3.36 (m, 1H), 1.00 (s, 3H), 0.68 (s, 3H);  $^{13}\text{C}$  NMR (100 MHz, DMSO- $d_6$ )  $\delta$  (ppm) 159.8 (d,  $J(\text{PC}) = 32.7$  Hz), 158.7, 153.4, 152.3, 147.7, 131.8, 130.0, 128.2, 125.9, 124.8, 122.8, 122.2, 117.5, 113.9, 108.4 (d,  $J(\text{PC}) = 188.1$  Hz), 75.9 (d,  $J(\text{PC}) = 14.6$  Hz), 62.1, 55.5, 33.5, 32.1 (d,  $J(\text{PC}) = 5.8$  Hz), 21.6, 20.4;  $^{31}\text{P}$  NMR (80 MHz,  $\text{CDCl}_3$ )  $\delta$  (ppm) 14.9; LC/MS  $m/z$ : 503  $[\text{M}-18+\text{H}]^+$ ; Anal. Calcd. for  $\text{C}_{28}\text{H}_{29}\text{N}_2\text{O}_6\text{P}$ : C, 64.61; H, 5.62; N, 5.38. Found: C, 64.75; H, 5.56; N, 5.45.

**Azo substituted phosphono-chromenes 34-43 [procedure (iii) in the main paper]**

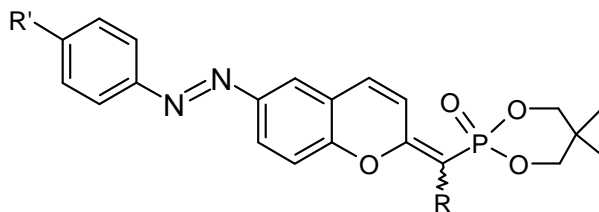

|                                                   |           |                                                                |           |
|---------------------------------------------------|-----------|----------------------------------------------------------------|-----------|
| R' = H, R = Ph                                    | <b>34</b> | R' = NO <sub>2</sub> , R = Ph                                  | <b>39</b> |
| R' = H, R = 4-Me-C <sub>6</sub> H <sub>4</sub>    | <b>35</b> | R' = NO <sub>2</sub> , R = 4-Me-C <sub>6</sub> H <sub>4</sub>  | <b>40</b> |
| R' = H, R = 4-MeO-C <sub>6</sub> H <sub>4</sub>   | <b>36</b> | R' = NO <sub>2</sub> , R = 4-MeO-C <sub>6</sub> H <sub>4</sub> | <b>41</b> |
| R' = H, R = 4-Cl-C <sub>6</sub> H <sub>4</sub> Ph | <b>37</b> | R' = NO <sub>2</sub> , R = 4-Cl-C <sub>6</sub> H <sub>4</sub>  | <b>42</b> |
| R' = H, R = Me                                    | <b>38</b> | R' = NO <sub>2</sub> , R = Me                                  | <b>43</b> |

**Compound (E)-34**

Red solid, yield 0.14 g (40%). Mp 202-206 °C; IR (KBr)  $\nu$  1630, 1562, 1470, 1260, 1235, 1055, 1003  $\text{cm}^{-1}$ ;  $^1\text{H}$  NMR (400 MHz,  $\text{CDCl}_3$ )  $\delta$  (ppm) 7.27-7.89 (m, 13H), 7.05 (d,  $J$  = 10.0 Hz, 1H), 6.87 (d,  $J$  = 10.0 Hz, 1H), 4.10-4.15 (m, 2H), 3.58-3.64 (m, 2H), 0.94 (s, 3H), 0.65 (s, 3H);  $^{13}\text{C}$  NMR (100 MHz,  $\text{CDCl}_3$ )  $\delta$  (ppm) 159.0 (d,  $J(\text{PC})$  = 35.0 Hz), 154.6, 152.5, 148.5, 133.9, 131.1, 130.9 (d,  $J(\text{PC})$  = 5.0 Hz), 130.1, 129.1, 128.1, 127.3, 125.5, 122.8, 120.9, 120.7, 120.5, 116.5, 102.1 (d,  $J(\text{PC})$  = 201.0 Hz), 75.2 (d,  $J(\text{PC})$  = 6.0 Hz), 32.3 (d,  $J(\text{PC})$  = 6.0 Hz), 21.6, 21.2;  $^{31}\text{P}$  NMR (80 MHz,  $\text{CDCl}_3$ )  $\delta$  (ppm) 14.9; LC/MS  $m/z$ : 473  $[\text{M}+\text{H}]^+$ ; HRMS (ESI) calcd for  $\text{C}_{27}\text{H}_{25}\text{N}_2\text{O}_4\text{P}$   $[\text{M} + \text{H}]^+$  473.1630, found 473.1630. Anal. Calcd. for  $\text{C}_{27}\text{H}_{25}\text{N}_2\text{O}_4\text{P}$ : C, 68.64; H, 5.33; N, 5.93. Found: C, 68.43; H, 5.41; N, 5.85.

**Compound (Z)-34**

Red solid, yield 0.13 g (36%). Mp 164-168 °C; IR (KBr)  $\nu$  1628, 1574, 1555, 1472, 1433, 1258, 1059, 1009  $\text{cm}^{-1}$ ;  $^1\text{H}$  NMR (400 MHz,  $\text{CDCl}_3$ )  $\delta$  (ppm) 7.27-7.95 (m, 13H), 6.86 (dd,  $J$  = 10.0 and  $\sim$ 2.0 Hz, 1H), 6.37 (d,  $J$  = 10.0 Hz, 1H), 3.88-3.95 (m, 2H), 3.72-3.76 (m, 2H), 1.21 (s, 3H), 0.81 (s, 3H);  $^{13}\text{C}$  NMR (100 MHz,  $\text{CDCl}_3$ )  $\delta$  (ppm) 158.5, 154.7, 152.5, 148.5, 133.9 (d,  $J(\text{PC})$  = 5.2 Hz), 131.1, 130.5, 129.2, 128.9, 127.8, 126.3, 122.8, 121.0, 120.4, 120.2, 119.3 (d,  $J(\text{PC})$  = 12.8 Hz), 116.9, 102.2 (d,  $J(\text{PC})$  = 181.9 Hz), 75.9, 32.4 (d,  $J(\text{PC})$  = 5.7 Hz), 21.9, 21.1;  $^{31}\text{P}$  NMR (80 MHz,  $\text{CDCl}_3$ )  $\delta$  (ppm) 11.7; LC/MS  $m/z$ : 473  $[\text{M}+\text{H}]^+$ ; Anal. Calcd. for  $\text{C}_{27}\text{H}_{25}\text{N}_2\text{O}_4\text{P}$ : C, 68.64; H, 5.33; N, 5.93. Found: C,

68.71; H, 5.25; N, 6.07.

### Compound (E)-35

Red solid, yield 0.11 g (32%). Mp 176-178 °C; IR (KBr)  $\nu$  1628, 1559, 1468, 1445, 1262, 1235  $\text{cm}^{-1}$ ;  $^1\text{H}$  NMR (400 MHz,  $\text{CDCl}_3$ )  $\delta$  (ppm) 7.20-7.89 (m, 12H), 7.02 (d,  $J = 8.0$  Hz, 1H), 6.90 (d,  $J = 8.0$  Hz), 4.07-4.12 (m, 2H), 3.59-3.65 (m, 2H), 2.41 (s, 3H), 0.98 (s, 3H), 0.69 (s, 3H);  $^{13}\text{C}$  NMR (100 MHz,  $\text{CDCl}_3$ )  $\delta$  (ppm) 158.7 (d,  $J(\text{PC}) = 34.9$  Hz), 154.7, 152.4, 148.5, 136.9, 131.0, 130.7, 130.6 (d,  $J(\text{PC}) = 4.7$  Hz), 129.9, 129.1, 128.9, 125.5, 122.8, 120.9, 120.7, 120.6, 116.5, 102.1 (d,  $J(\text{PC}) = 191.0$  Hz), 75.3 (d,  $J(\text{PC}) = 5.3$  Hz), 32.3 (d,  $J(\text{PC}) = 5.7$  Hz), 21.7, 21.4, 21.2;  $^{31}\text{P}$  NMR (80 MHz,  $\text{CDCl}_3$ )  $\delta$  (ppm) 15.2; LC/MS  $m/z$ : 487  $[\text{M}+\text{H}]^+$ ; Anal. Calcd. for  $\text{C}_{28}\text{H}_{27}\text{N}_2\text{O}_4$  P: C, 69.13; H, 5.59; N, 5.76. Found: C, 69.32; H, 5.51; N, 5.66. X-ray structure was determined for this sample.

### Compound (Z)-35

Red solid, yield 0.14 g (40%). Mp 190-194 °C; IR (KBr)  $\nu$  1630, 1615, 1574, 1476, 1435, 1258, 1236  $\text{cm}^{-1}$ ;  $^1\text{H}$  NMR (400 MHz,  $\text{CDCl}_3$ )  $\delta$  (ppm) 7.20-7.96 (m, 12H), 6.81 (dd,  $J = 10.0$  and  $\sim 2.0$  Hz, 1H), 6.38 (d,  $J = 10.0$  Hz, 1H), 3.85-3.92 (m, 2H), 3.73-3.77 (m, 2H), 2.38 (s, 3H), 1.21 (s, 3H), 0.81 (s, 3H);  $^{13}\text{C}$  NMR (100 MHz,  $\text{CDCl}_3$ )  $\delta$  (ppm) 158.0, 154.7, 152.4, 148.4, 137.5, 131.0, 130.7 (d,  $J(\text{PC}) = 5.1$  Hz), 130.1, 129.5, 129.1, 129.0, 126.1, 122.7, 120.9, 120.4, 119.4 (d,  $J(\text{PC}) = 13.1$  Hz), 116.7, 102.3 (d,  $J(\text{PC}) = 179.6$  Hz), 76.0 (d,  $J(\text{PC}) = 5.8$  Hz), 32.3 (d,  $J(\text{PC}) = 5.6$  Hz), 21.9, 21.2, 21.0;  $^{31}\text{P}$  NMR (80 MHz,  $\text{CDCl}_3$ )  $\delta$  (ppm) 11.9; LC/MS  $m/z$ : 487  $[\text{M}+\text{H}]^+$ ; Anal. Calcd. for  $\text{C}_{28}\text{H}_{27}\text{N}_2\text{O}_4$  P: C, 69.13; H, 5.59; N, 5.76. Found: C, 69.05; H, 5.63; N, 5.82.

### Compound (E)-36

Red solid, yield 0.10 g (30%). Mp 162-166 °C; IR (KBr)  $\nu$  1628, 1607, 1561, 1468, 1262, 1231  $\text{cm}^{-1}$ ;  $^1\text{H}$  NMR (400 MHz,  $\text{CDCl}_3$ )  $\delta$  (ppm) 6.94-7.96 (m, 12H), 7.02 (d,  $J = 8.0$  Hz, 1H), 6.90 (d,  $J = 8.0$  Hz, 1H), 4.09-4.14 (m, 2H), 3.87 (s, 3H), 3.59-3.65 (m, 2H), 0.96 (s, 3H), 0.69 (s, 3H);  $^{13}\text{C}$  NMR (100 MHz,  $\text{CDCl}_3$ )  $\delta$  (ppm) 159.0 (d,  $J(\text{PC}) = 36.7$  Hz), 154.7, 152.5, 148.5, 132.0 (d,  $J(\text{PC}) = 4.7$  Hz), 131.1, 129.9, 129.2, 126.0, 125.5, 122.8, 120.9, 120.8, 120.6, 120.1, 116.5, 101.7 (d,  $J(\text{PC}) = 200.2$  Hz), 75.3 (d,  $J(\text{PC}) = 5.7$  Hz), 55.3, 32.3 (d,  $J(\text{PC}) = 5.7$  Hz), 21.7, 21.3;  $^{31}\text{P}$  NMR (80 MHz,  $\text{CDCl}_3$ )  $\delta$  (ppm) 15.3;

LC/MS  $m/z$ : 503  $[M+H]^+$ ; Anal. Calcd. for  $C_{28}H_{27}N_2O_5P$ : C, 66.93; H, 5.42; N, 5.57.  
Found: C, 66.85; H, 5.39; N, 5.62.

### Compound (Z)-36

Red solid, yield 0.15 g (43%). Mp 172-175 °C; IR (KBr)  $\nu$  1630, 1613, 1574, 1435, 1236  $cm^{-1}$ ;  $^1H$  NMR (400 MHz,  $CDCl_3$ )  $\delta$  (ppm) 6.93-7.94 (m, 12H), 6.85 (dd,  $J = 10.0$  and 3.0 Hz, 1H), 6.38 (d,  $J = 10.0$  Hz, 1H), 3.88-3.95 (m, 2H), 3.85 (s, 3H), 3.73-3.77 (m, 2H), 1.21 (s, 3H), 0.82 (s, 3H);  $^{13}C$  NMR (100 MHz,  $CDCl_3$ )  $\delta$  (ppm) 159.1, 158.1, 154.8, 152.5, 148.5, 132.1, 131.1, 130.1, 129.2, 126.2, 125.9, 122.8, 121.0, 120.5, 119.5 (d,  $J(PC) = 12.0$  Hz), 116.8, 114.3, 102.0 (d,  $J(PC) = 180.8$  Hz), 76.0, 55.3, 32.4, 22.0, 21.1;  $^{31}P$  NMR (80 MHz,  $CDCl_3$ )  $\delta$  (ppm) 12.0; LC/MS  $m/z$ : 503  $[M+H]^+$ ; Anal. Calcd. for  $C_{28}H_{27}N_2O_5P$ : C, 66.93; H, 5.42; N, 5.57. Found: C, 66.78; H, 5.35; N, 5.66.

### Compound (E)-37

Red solid, yield 0.16 g (37%). Mp 200-202 °C; IR (KBr)  $\nu$  1628, 1578, 1468, 1445, 1262, 1235  $cm^{-1}$ ;  $^1H$  NMR (400 MHz,  $CDCl_3$ )  $\delta$  (ppm) 7.33-7.90 (m, 12H), 7.07 (d,  $J = 10.0$  Hz, 1H), 6.90 (d,  $J = 10.0$  Hz, 1H), 4.16-4.21 (m, 2H), 3.59-3.66 (m, 2H), 0.93 (s, 3H), 0.70 (s, 3H);  $^{13}C$  NMR (100 MHz,  $CDCl_3$ )  $\delta$  (ppm) 159.6 (d,  $J(PC) = 34.6$  Hz), 154.5, 152.5, 148.7, 133.2, 132.6, 132.4 (d,  $J(PC) = 4.6$  Hz), 131.2, 130.6, 129.2, 128.4, 125.6, 122.9, 121.1, 120.7, 120.3, 116.5, 100.5 (d,  $J(PC) = 202.9$  Hz), 75.1 (d,  $J(PC) = 5.5$  Hz), 32.3 (d,  $J(PC) = 5.6$  Hz), 21.6, 21.4;  $^{31}P$  NMR (80 MHz,  $CDCl_3$ )  $\delta$  (ppm) 15.0; LC/MS  $m/z$ : 507  $[M]^+$  and 509  $[M+2H]^+$ ; Anal. Calcd. for  $C_{27}H_{24}N_2O_4ClP$ : C, 63.97; H, 4.77; N, 5.53. Found: C, 63.85; H, 4.71; N, 5.65.

### Compound (Z)-37

Red solid, yield 0.16 g (37%). Mp 188-192 °C; IR (KBr)  $\nu$  1630, 1574, 1480, 1435, 1258, 1236  $cm^{-1}$ ;  $^1H$  NMR (400 MHz,  $CDCl_3$ )  $\delta$  (ppm) 7.32-7.89 (m, 12H), 6.91 (dd,  $J = 10.4$  and  $\sim 2.0$  Hz, 1H), 6.34 (d,  $J = 10.4$  Hz, 1H), 3.93-4.00 (m, 2H), 3.72-3.77 (m, 2H), 1.20 (s, 3H), 0.85 (s, 3H);  $^{13}C$  NMR (100 MHz,  $CDCl_3$ )  $\delta$  (ppm) 158.5, 154.6, 152.5, 148.6, 133.8, 132.7, 132.4, 131.2, 131.0, 129.2, 126.4, 122.9, 121.2, 120.3, 118.9 (d,  $J(PC) = 12.6$  Hz), 116.9, 101.2 (d,  $J(PC) = 182.0$  Hz), 76.0, 32.5, 22.0, 21.2;  $^{31}P$  NMR (80 MHz,  $CDCl_3$ )  $\delta$  (ppm) 11.4; LC/MS  $m/z$ : 507  $[M]^+$  and 509  $[M+2H]^+$ ; Anal. Calcd. for

C<sub>27</sub>H<sub>24</sub>N<sub>2</sub>O<sub>4</sub>CIP: C, 63.97; H, 4.77; N, 5.53. Found: C, 63.85; H, 4.69; N, 5.61.

### Compound (E)-38

Red solid, yield 0.20 g (50%). Mp 238-242 °C; IR (KBr)  $\nu$  1634, 1609, 1578, 1472, 1433, 1231 cm<sup>-1</sup>; <sup>1</sup>H NMR (400 MHz, CDCl<sub>3</sub>)  $\delta$  (ppm) 7.47-7.91 (m, 8H), 7.19 (d, *J* = 10.0 Hz, 1H), 6.86 (d, *J* = 10.0 Hz, 1H), 4.34-4.38 (m, 2H), 3.76-3.83 (m, 2H), 2.02 (d, *J* = 14.0 Hz, 3H), 1.27 (s, 3H), 0.97 (s, 3H); <sup>13</sup>C NMR (100 MHz, CDCl<sub>3</sub>)  $\delta$  (ppm) 159.0 (d, *J*(PC) = 36.1 Hz), 154.9, 152.5, 148.5, 131.0, 129.1, 128.0, 125.4, 122.8, 120.9, 120.7, 116.1, 94.6 (d, *J*(PC) = 202.6 Hz), 74.5 (d, *J*(PC) = 5.3 Hz), 32.5 (d, *J*(PC) = 5.0 Hz), 22.3, 21.5, 12.1 (d, *J*(PC) = 4.0 Hz); <sup>31</sup>P NMR (80 MHz, CDCl<sub>3</sub>)  $\delta$  (ppm) 20.9; LC/MS *m/z*: 411 [M+H]<sup>+</sup>; Anal. Calcd. for C<sub>22</sub>H<sub>23</sub>N<sub>2</sub>O<sub>4</sub>P: C, 64.39; H, 5.65; N, 6.83. Found: C, 64.55; H, 5.58; N, 6.75.

### Compound (Z)-38

Red solid, yield 0.12 g (30%). Mp 196-200 °C; IR (KBr)  $\nu$  1628, 1580, 1472, 1262, 1231 cm<sup>-1</sup>; <sup>1</sup>H NMR (400 MHz, CDCl<sub>3</sub>)  $\delta$  (ppm) 7.18-7.90 (m, 8H), 6.93 (dd, *J* = 13.2 and ~3.6 Hz, 1H), 6.61 (d, *J* = 10.0 Hz, 1H), 4.12-4.18 (m, 2H), 3.87-3.92 (m, 2H), 1.94 (d, *J* = 14.8 Hz, 3H), 1.22 (s, 3H), 1.05 (s, 3H); <sup>13</sup>C NMR (100 MHz, CDCl<sub>3</sub>)  $\delta$  (ppm) 156.2, 155.0, 152.5, 148.3, 131.0, 129.8, 129.1, 126.2, 122.8, 121.0, 120.3, 118.0 (d, *J*(PC) = 14.2 Hz), 116.3, 93.0 (d, *J*(PC) = 182.5 Hz), 75.6 (d, *J*(PC) = 5.9 Hz), 32.5 (d, *J*(PC) = 5.6 Hz), 21.9, 21.6, 12.3 (d, *J*(PC) = 6.9 Hz); <sup>31</sup>P NMR (80 MHz, CDCl<sub>3</sub>)  $\delta$  (ppm) 17.0; LC/MS *m/z*: 411 [M+H]<sup>+</sup>; Anal. Calcd. for C<sub>22</sub>H<sub>23</sub>N<sub>2</sub>O<sub>4</sub>P: C, 64.39; H, 5.65; N, 6.83. Found: C, 64.51; H, 5.71; N, 6.75.

### Compound (E)-39

Red solid, yield 0.16 g (40%). Mp 234-236 °C; IR (KBr)  $\nu$  1630, 1559, 1522, 1460, 1339, 1235 cm<sup>-1</sup>; <sup>1</sup>H NMR (400 MHz, CDCl<sub>3</sub>)  $\delta$  (ppm) 7.35-8.37 (m, 12H), 7.04 (d, *J* = 10.0 Hz, 1H), 6.89 (d, *J* = 10.0 Hz, 1H), 4.12-4.16 (m, 2H), 3.58-3.64 (m, 2H), 0.94 (s, 3H), 0.64 (s, 3H); <sup>13</sup>C NMR (100 MHz, CDCl<sub>3</sub>)  $\delta$  (ppm) 158.9, 158.5, 155.6 (d, *J*(PC) = 5.9 Hz), 148.5 (d, *J*(PC) = 30.8 Hz), 133.8, 130.8 (d, *J*(PC) = 4.6 Hz), 129.7, 128.2, 127.4, 126.2, 124.8, 123.4, 121.6, 121.0, 116.8, 102.9 (d, *J*(PC) = 200.5 Hz), 75.3 (d, *J*(PC) = 5.8 Hz), 32.3 (d, *J*(PC) = 5.8 Hz), 21.6, 21.2; <sup>31</sup>P NMR (80 MHz, CDCl<sub>3</sub>)  $\delta$  (ppm) 14.5;

LC/MS  $m/z$ : 518  $[M+H]^+$ ; Anal. Calcd. for  $C_{27}H_{24}N_3O_6P$ : C, 62.67; H, 4.67; N, 8.12.  
Found: C, 62.55; H, 4.72; N, 8.28.

### Compound (Z)-39

Red solid, yield 0.16 g (40%). Mp 218-222 °C; IR (KBr)  $\nu$  1612, 1572, 1518, 1343, 1273, 1240  $cm^{-1}$ ;  $^1H$  NMR (400 MHz,  $CDCl_3$ )  $\delta$  (ppm) 7.27-8.39 (m, 12H), 6.86 (dd,  $J = 10.4$  and  $\sim 3.0$  Hz, 1H), 6.39 (d,  $J = 9.6$  Hz, 1H), 3.88-3.94 (m, 2H), 3.71-3.75 (m, 2H), 1.20 (s, 3H), 0.80 (s, 3H);  $^{13}C$  NMR (100 MHz,  $CDCl_3$ )  $\delta$  (ppm) 158.0, 155.7 (d,  $J(PC) = 17.4$  Hz), 148.5 (d,  $J(PC) = 29.1$  Hz), 133.8, 130.9, 130.0, 129.0, 128.0, 126.9, 124.8, 123.8, 123.4, 123.3, 121.8, 120.7, 119.8 (d,  $J(PC) = 13.1$  Hz), 117.2, 103.4 (d,  $J(PC) = 180.0$  Hz), 76.1, 32.4 (d,  $J(PC) = 5.6$  Hz), 22.0, 21.0;  $^{31}P$  NMR (80 MHz,  $CDCl_3$ )  $\delta$  (ppm) 11.2; LC/MS  $m/z$ : 518  $[M+H]^+$ ; Anal. Calcd. for  $C_{27}H_{24}N_3O_6P$ : C, 62.67; H, 4.67; N, 8.12.  
Found: C, 62.54; H, 4.58; N, 8.22.

### Compound (E)-40

Red solid, yield 0.18 g (48%). Mp 238-240 °C; IR (KBr)  $\nu$  1630, 1609, 1557, 1520, 1460, 1339, 1262, 1235  $cm^{-1}$ ;  $^1H$  NMR (400 MHz,  $CDCl_3$ )  $\delta$  (ppm) 7.21-8.36 (m, 11H), 7.01 (d,  $J = 10.0$  Hz, 1H), 6.92 (d,  $J = 10.0$  Hz, 1H), 4.08-4.13 (m, 2H), 3.59-3.65 (m, 2H), 2.41 (s, 3H), 0.97 (s, 3H), 0.69 (s, 3H);  $^{13}C$  NMR (100 MHz,  $CDCl_3$ )  $\delta$  (ppm) 158.6, 158.3, 155.7 (d,  $J(PC) = 11.8$  Hz), 148.5 (d,  $J(PC) = 32.0$  Hz), 137.1, 130.6, 130.5, 129.4, 128.9, 126.1, 124.8, 123.4, 121.6, 121.1, 116.8, 103.1 (d,  $J(PC) = 198.7$  Hz), 75.4 (d,  $J(PC) = 5.8$  Hz), 32.3 (d,  $J(PC) = 5.8$  Hz), 21.7, 21.4, 21.3;  $^{31}P$  NMR (80 MHz,  $CDCl_3$ )  $\delta$  (ppm) 14.7; LC/MS  $m/z$ : 532  $[M+H]^+$ ; Anal. Calcd. for  $C_{28}H_{26}N_3O_6P$ : C, 63.27; H, 4.93; N, 7.91. Found: C, 63.12; H, 4.88; N, 7.85.

### Compound (Z)-40

Red solid, yield 0.11 g (28%). Mp 244-246 °C; IR (KBr)  $\nu$  1611, 1559, 1524, 1456, 1435, 1260  $cm^{-1}$ ;  $^1H$  NMR (400 MHz,  $CDCl_3$ )  $\delta$  (ppm) 7.21-8.40 (m, 11H), 6.83 (dd,  $J = 13.2$  and  $\sim 3.2$  Hz, 1H), 6.41 (d,  $J = 9.6$  Hz, 1H), 3.87-3.94 (m, 2H), 3.72-3.76 (m, 2H), 2.39 (s, 3H), 1.21 (s, 3H), 0.81 (s, 3H);  $^{13}C$  NMR (100 MHz,  $CDCl_3$ )  $\delta$  (ppm) 157.7, 155.8, 155.6, 148.3 (d,  $J(PC) = 29.0$  Hz), 137.7, 130.7 (d,  $J(PC) = 4.0$  Hz), 129.7, 129.6, 126.8, 124.8, 123.4, 121.7, 120.7, 119.8 (d,  $J(PC) = 13.0$  Hz), 117.1, 103.4 (d,  $J(PC) = 179.0$

Hz), 76.1 (d,  $J(\text{PC}) = 6.0$  Hz), 32.3 (d,  $J(\text{PC}) = 6.0$  Hz), 22.0, 21.3, 21.0;  $^{31}\text{P}$  NMR (80 MHz,  $\text{CDCl}_3$ )  $\delta$  (ppm) 11.5; LC/MS  $m/z$ : 532  $[\text{M}+\text{H}]^+$ ; Anal. Calcd. for  $\text{C}_{28}\text{H}_{26}\text{N}_3\text{O}_6\text{P}$ : C, 63.27; H, 4.93; N, 7.91. Found: C, 63.41; H, 4.88; N, 7.81.

#### Compound (E)-41

Red solid, yield 0.14 g (38%). Mp 238-242 °C; IR (KBr)  $\nu$  1630, 1609, 1553, 1522, 1341, 1227  $\text{cm}^{-1}$ ;  $^1\text{H}$  NMR (400 MHz,  $\text{CDCl}_3$ )  $\delta$  (ppm) 6.91-8.36 (m, 13H), 4.10-4.15 (m, 2H), 3.87 (s, 3H), 3.59-3.65 (m, 2H), 0.96 (s, 3H), 0.69 (s, 3H);  $^{13}\text{C}$  NMR (100 MHz,  $\text{CDCl}_3$ )  $\delta$  (ppm) 158.9, 158.5, 155.7, 155.6, 148.5 (d,  $J(\text{PC}) = 30.9$  Hz), 132.0 (d,  $J(\text{PC}) = 5.8$  Hz), 129.5, 126.2, 125.8, 124.8, 123.4, 121.6, 121.1, 116.8, 113.7, 102.6 (d,  $J(\text{PC}) = 199.8$  Hz), 75.4 (d,  $J(\text{PC}) = 5.8$  Hz), 55.3, 32.3 (d,  $J(\text{PC}) = 5.9$  Hz), 21.7, 21.3;  $^{31}\text{P}$  NMR (80 MHz,  $\text{CDCl}_3$ )  $\delta$  (ppm) 14.9; LC/MS  $m/z$ : 548  $[\text{M}+\text{H}]^+$ ; Anal. Calcd. for  $\text{C}_{28}\text{H}_{26}\text{N}_3\text{O}_7\text{P}$ : C, 61.43; H, 4.79; N, 7.67. Found: C, 61.32; H, 4.68; N, 7.56.

#### Compound (Z)-41

Red solid, yield 0.14 g (38%). Mp 206-208 °C; IR (KBr)  $\nu$  1628, 1611, 1578, 1528, 1343, 1238  $\text{cm}^{-1}$ ;  $^1\text{H}$  NMR (400 MHz,  $\text{CDCl}_3$ )  $\delta$  (ppm) 6.93-8.01 (m, 11H), 6.83 (dd,  $J = 13.6$  and  $\sim 3.6$  Hz, 1H), 6.40 (d,  $J = 10.0$  Hz, 1H), 3.88-3.95 (m, 2H), 3.85 (s, 3H), 3.71-3.76 (m, 2H), 1.21 (s, 3H), 0.82 (s, 3H);  $^{13}\text{C}$  NMR (100 MHz,  $\text{CDCl}_3$ )  $\delta$  (ppm) 159.3, 157.9, 155.8, 155.6, 148.5 (d,  $J(\text{PC}) = 29.6$  Hz), 132.1 (d,  $J(\text{PC}) = 4.9$  Hz), 129.8, 126.8, 125.7 (d,  $J(\text{PC}) = 5.6$  Hz), 124.8, 123.4, 121.7, 120.8, 119.9 (d,  $J(\text{PC}) = 12.8$  Hz), 117.1, 114.4, 102.9 (d,  $J(\text{PC}) = 180.4$  Hz), 76.0 (d,  $J(\text{PC}) = 6.0$  Hz), 55.4, 32.4 (d,  $J(\text{PC}) = 6.0$  Hz), 22.0, 21.1;  $^{31}\text{P}$  NMR (80 MHz,  $\text{CDCl}_3$ )  $\delta$  (ppm) 11.6; LC/MS  $m/z$ : 548  $[\text{M}+\text{H}]^+$ ; Anal. Calcd. for  $\text{C}_{28}\text{H}_{26}\text{N}_3\text{O}_7\text{P}$ : C, 61.43; H, 4.79; N, 7.67. Found: C, 61.55; H, 4.65; N, 7.58.

#### Compound (E)-42

Red solid, yield 0.14 g (39%). Mp. 226-228 °C; IR (KBr)  $\nu$  1628, 1611, 1572, 1557, 1524, 1385, 1339, 1238  $\text{cm}^{-1}$ ;  $^1\text{H}$  NMR (400 MHz,  $\text{CDCl}_3$ )  $\delta$  (ppm) 7.33-8.39 (m, 11H), 7.07 (d,  $J = 10.0$  Hz, 1H), 6.92 (d,  $J = 10.0$  Hz, 1H), 4.17-4.22 (m, 2H), 3.59-3.66 (m, 2H), 0.92 (s, 3H), 0.69 (s, 3H);  $^{13}\text{C}$  NMR (100 MHz,  $\text{CDCl}_3$ )  $\delta$  (ppm) 159.4, 159.0, 155.5 (d,  $J(\text{PC}) = 7.5$  Hz), 148.5 (d,  $J(\text{PC}) = 26.7$  Hz), 133.3, 132.3 (d,  $J(\text{PC}) = 4.7$  Hz), 130.1, 128.5, 126.2, 124.8, 123.4, 121.8, 120.9, 120.7, 116.8, 101.4 (d,  $J(\text{PC}) = 202.3$  Hz), 75.2

(d,  $J(\text{PC}) = 5.6$  Hz), 32.3 (d,  $J(\text{PC}) = 5.5$  Hz), 21.5, 21.3;  $^{31}\text{P}$  NMR (80 MHz,  $\text{CDCl}_3$ )  $\delta$  (ppm) 14.6; LC/MS  $m/z$ : 552  $[\text{M}]^+$  and 554  $[\text{M}+2\text{H}]^+$ ; Anal. Calcd. for  $\text{C}_{27}\text{H}_{23}\text{ClN}_3\text{O}_6\text{P}$ : C, 58.76; H, 4.20; N, 7.61. Found: C, 58.62; H, 4.28; N, 7.88.

#### Compound (Z)-42

Red solid, yield 0.14 g (39%). Mp. 202-204 °C; IR (KBr)  $\nu$  1626, 1559, 1522, 1458, 1343, 1458, 1244, 1049  $\text{cm}^{-1}$ ;  $^1\text{H}$  NMR (400 MHz,  $\text{CDCl}_3$ )  $\delta$  (ppm) 7.33-8.38 (m, 11H), 6.90 (dd,  $J = 10.0$  and  $\sim 2.0$  Hz, 1H), 6.37 (d,  $J = 9.6$  Hz, 1H), 3.95-4.01 (m, 2H), 3.71-3.76 (m, 2H), 1.19 (s, 3H), 0.85 (s, 3H);  $^{13}\text{C}$  NMR (100 MHz,  $\text{CDCl}_3$ )  $\delta$  (ppm) 158.2, 155.6 (d,  $J(\text{PC}) = 7.4$  Hz), 148.5 (d,  $J(\text{PC}) = 26.3$  Hz), 134.0, 132.4, 132.3, 130.6, 129.2, 126.9, 124.8, 123.5, 121.9, 120.6, 119.4 (d,  $J(\text{PC}) = 12.7$  Hz), 117.2, 102.1 (d,  $J(\text{PC}) = 182.2$  Hz), 76.0 (d,  $J(\text{PC}) = 6.0$  Hz), 32.4 (d,  $J(\text{PC}) = 6.0$  Hz), 21.9, 21.2;  $^{31}\text{P}$  NMR (80 MHz,  $\text{CDCl}_3$ )  $\delta$  (ppm) 11.0; LC/MS  $m/z$ : 552  $[\text{M}]^+$  and 554  $[\text{M}+2\text{H}]^+$ ; Anal. Calcd. for  $\text{C}_{27}\text{H}_{23}\text{ClN}_3\text{O}_6\text{P}$ : C, 58.76; H, 4.20; N, 7.61. Found: C, 58.85; H, 4.31; N, 7.55.

#### Compound (E)-43

Red solid, yield 0.22 g (49%). Mp. 244-248 °C; IR (KBr)  $\nu$  1632, 1562, 1510, 1339, 1231, 1051  $\text{cm}^{-1}$ ;  $^1\text{H}$  NMR (400 MHz,  $\text{CDCl}_3$ )  $\delta$  (ppm) 7.81-8.03 (m, 7H), 7.22 (d,  $J = 8.0$  Hz, 1H), 6.86 (d,  $J = 8.0$  Hz, 1H), 4.35-4.39 (m, 2H), 3.76-3.83 (m, 2H), 2.03 (d,  $J = 12.0$  Hz, 3H), 1.28 (s, 3H), 0.97 (s, 3H);  $^{13}\text{C}$  NMR (100 MHz,  $\text{CDCl}_3$ )  $\delta$  (ppm) 158.7 (d,  $J(\text{PC}) = 36.2$  Hz), 155.9 (d,  $J(\text{PC}) = 3.1$  Hz), 155.6, 148.6, 148.4, 127.5, 126.0, 124.8, 123.3, 121.5, 121.2, 121.1, 116.4, 94.6 (d,  $J(\text{PC}) = 202.0$  Hz), 74.5 (d,  $J(\text{PC}) = 5.4$  Hz), 32.5 (d,  $J(\text{PC}) = 5.3$  Hz), 22.3, 21.5, 12.1 (d,  $J(\text{PC}) = 4.3$  Hz);  $^{31}\text{P}$  NMR (80 MHz,  $\text{CDCl}_3$ )  $\delta$  (ppm) 20.5; LC/MS  $m/z$ : 456  $[\text{M}+\text{H}]^+$ ; Anal. Calcd. for  $\text{C}_{22}\text{H}_{22}\text{N}_3\text{O}_6\text{P}$ : C, 58.02; H, 4.87; N, 9.23. Found: C, 58.21; H, 4.78; N, 9.45.

#### Compound (Z)-43 (~90%; the remaining was the E-isomer)

Red solid, yield 0.11 g (25%); Mp. 146-150 °C; IR (KBr)  $\nu$  1638, 1605, 1526, 1462, 1343, 1262, 1053  $\text{cm}^{-1}$ ;  $^1\text{H}$  NMR (400 MHz,  $\text{CDCl}_3$ ) (major)  $\delta$  (ppm) 7.21-8.40 (m, 7H), 6.94 (dd,  $J = 10.0$  and  $\sim 2.0$  Hz, 1H), 6.63 (d,  $J = 9.6$  Hz, 1H), 4.14-4.20 (m, 2H), 3.87-3.92 (m, 2H), 1.95 (d,  $J = 14.8$  Hz, 3H), 1.21 (s, 3H), 1.07 (s, 3H);  $^{13}\text{C}$  NMR (100 MHz,  $\text{CDCl}_3$ )  $\delta$  (ppm) 155.6 (d,  $J(\text{PC}) = 31.1$  Hz) 148.7, 148.4, 127.5, 126.0, 124.7<sub>8</sub>, 124.7<sub>7</sub>,



123.4, 121.5, 121.2, 116.4, 92.1, 74.5 (d,  $J(\text{PC}) = 5.7$  Hz), 32.5 (d,  $J(\text{PC}) = 5.0$  Hz), 22.3, 21.5, 12.2; The doublet due to P-C carbon could not be clearly identified due to low intensity;  $^{31}\text{P}$  NMR  $\delta$  (ppm) 16.6; LC/MS  $m/z$ : 456  $[\text{M}+\text{H}]^+$ ; Anal. Calcd. for  $\text{C}_{22}\text{H}_{22}\text{N}_3\text{O}_6\text{P}$ : C, 58.02; H, 4.87; N, 9.23: Found: C, 58.12; H, 4.91; N, 9.12.

**Crystal data:**

**(E)-8:**  $\text{C}_{21}\text{H}_{23}\text{O}_4\text{PS}$ ,  $M = 402.43$ , Monoclinic, Space group  $\text{P}2(1)/c$ ,  $a = 10.667(2)$ ,  $b = 9.913(2)$ ,  $c = 20.138(4)$  Å,  $\beta = 111.543(9)$ ,  $V = 1980.7(7)$  Å<sup>3</sup>,  $Z = 4$ ,  $\mu = 0.268$  mm<sup>-1</sup>, data/restraints/parameters: 3484/ 0/ 246, R indices ( $I > 2\sigma(I)$ ):  $R1 = 0.0697$ ,  $wR2$  (all data) = 0.1355

**9:**  $\text{C}_{21}\text{H}_{23}\text{O}_4\text{PS}$ ,  $M = 402.43$ , Monoclinic, Space group  $\text{P}2(1)/c$ ,  $a = 9.127(2)$ ,  $b = 17.133(3)$ ,  $c = 12.580(3)$  Å,  $\beta = 93.34(2)$ ,  $V = 1980.7(7)$  Å<sup>3</sup>,  $Z = 4$ ,  $\mu = 0.270$  mm<sup>-1</sup>, data/restraints/parameters: 3436/ 0/ 251, R indices ( $I > 2\sigma(I)$ ):  $R1 = 0.0415$ ,  $wR2$  (all data) = 0.0871

**(E)-12:**  $\text{C}_{22}\text{H}_{25}\text{O}_5\text{PS}$ ,  $M = 432.35$ , Monoclinic, Space group  $\text{P}2(1)/c$ ,  $a = 5.952(2)$ ,  $b = 9.834(4)$ ,  $c = 36.141(14)$  Å,  $\beta = 94.321(7)$ ,  $V = 2109.4(14)$  Å<sup>3</sup>,  $Z = 4$ ,  $\mu = 0.260$  mm<sup>-1</sup>, data/restraints/parameters: 3712/ 0/ 266, R indices ( $I > 2\sigma(I)$ ):  $R1 = 0.0593$ ,  $wR2$  (all data) = 0.1458

(*Z*)-**12**: C<sub>22</sub>H<sub>25</sub>O<sub>5</sub>PS, *M* = 432.46, Monoclinic, Space group P2(1)/c, *a* = 12.3185(7), *b* = 12.0813(7), *c* = 18.8019(8) Å,  $\beta$  = 130.587(2), *V* = 2124.98(19) Å<sup>3</sup>, *Z* = 4,  $\mu$  = 0.258 mm<sup>-1</sup>, data/restraints/parameters: 3752/ 0/ 265, R indices (*I* > 2 $\sigma$ (*I*)): R1 = 0.0687, *w*R2 (all data) = 0.1544

(*E*)-**16**: C<sub>16</sub>H<sub>21</sub>O<sub>4</sub>PS, *M* = 340.37, Monoclinic, Space group P2(1)/c, *a* = 6.8884(5), *b* = 22.6134(16), *c* = 11.3005(7) Å,  $\beta$  = 111.284(3), *V* = 1640.22(19) Å<sup>3</sup>, *Z* = 4,  $\mu$  = 0.309 mm<sup>-1</sup>, data/restraints/parameters: 2884/ 0/ 202, R indices (*I* > 2 $\sigma$ (*I*)): R1 = 0.0497, *w*R2 (all data) = 0.1166

(*E*)-**35**: C<sub>28</sub>H<sub>27</sub>N<sub>2</sub>O<sub>4</sub>P, *M* = 486.49, Monoclinic, Space group P2(1)/c, *a* = 21.0466(15), *b* = 11.4539(8), *c* = 9.9034(7) Å,  $\beta$  = 91.0190(10), *V* = 2387.0(3) Å<sup>3</sup>, *Z* = 4,  $\mu$  = 0.154 mm<sup>-1</sup>, data/restraints/parameters: 4198/ 0/ 319, R indices (*I* > 2 $\sigma$ (*I*)): R1 = 0.0474, *w*R2 (all data) = 0.1156

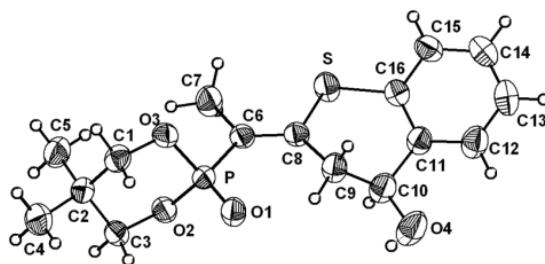

**Figure S1.** An ORTEP diagram of compound (*E*)-**16**. Selected bond lengths [Å] with esd's in parentheses. P-C(6) 1.772(3), C(6)-C(8) 1.346(4), C(8)-C(9) 1.500(3), C(9)-C(10) 1.532(4), S-C(8) 1.765(2), O(4)-C(10) 1.389(3). [Hydrogen bond parameters: O(4)-H(4)...O(1) 0.82 1.90 2.699(3) 164.3 °; symmetry code: 1-x, 1-y, 1-z].

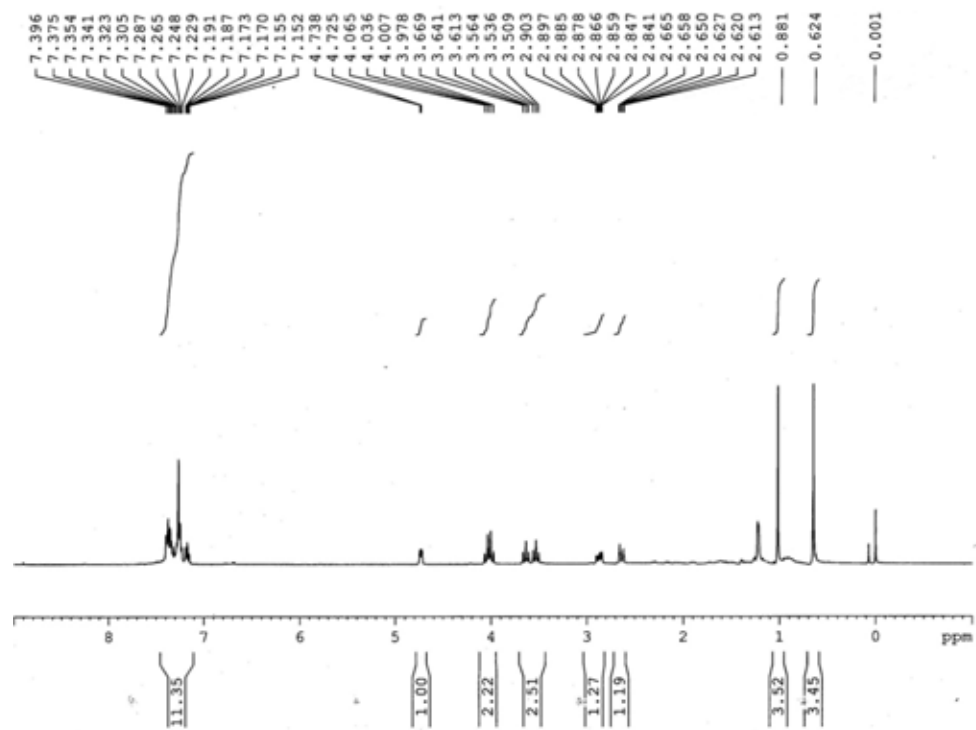

Figure S2a. <sup>1</sup>H NMR spectrum of compound (Z)-8

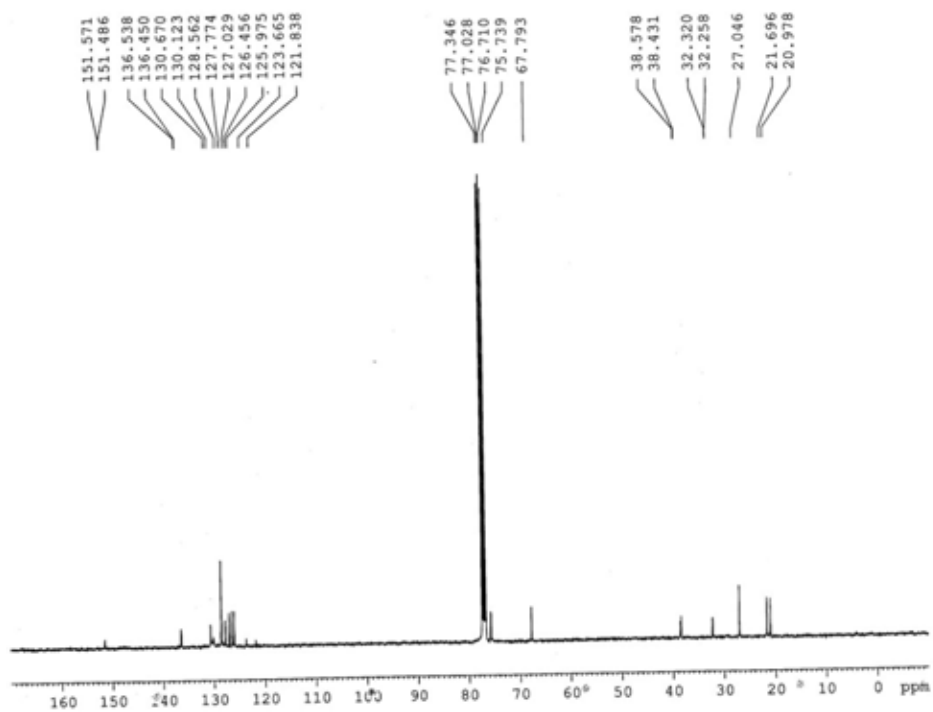

Figure S2b. <sup>13</sup>C NMR spectrum of compound (Z)-8

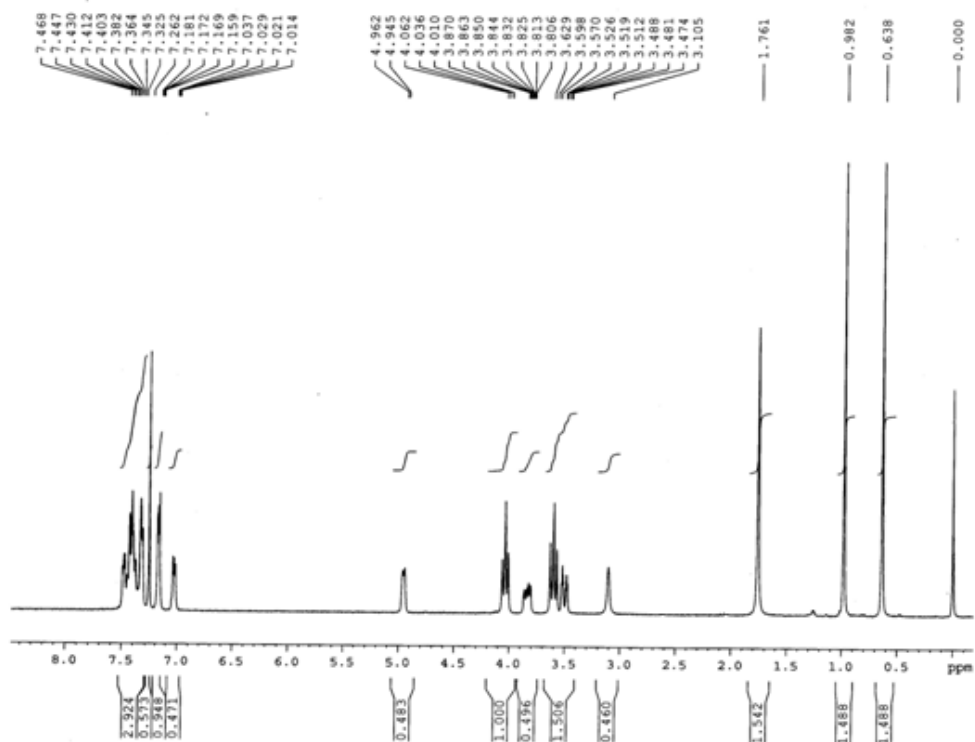

Figure S3a. <sup>1</sup>H NMR spectrum of compound (E)-8

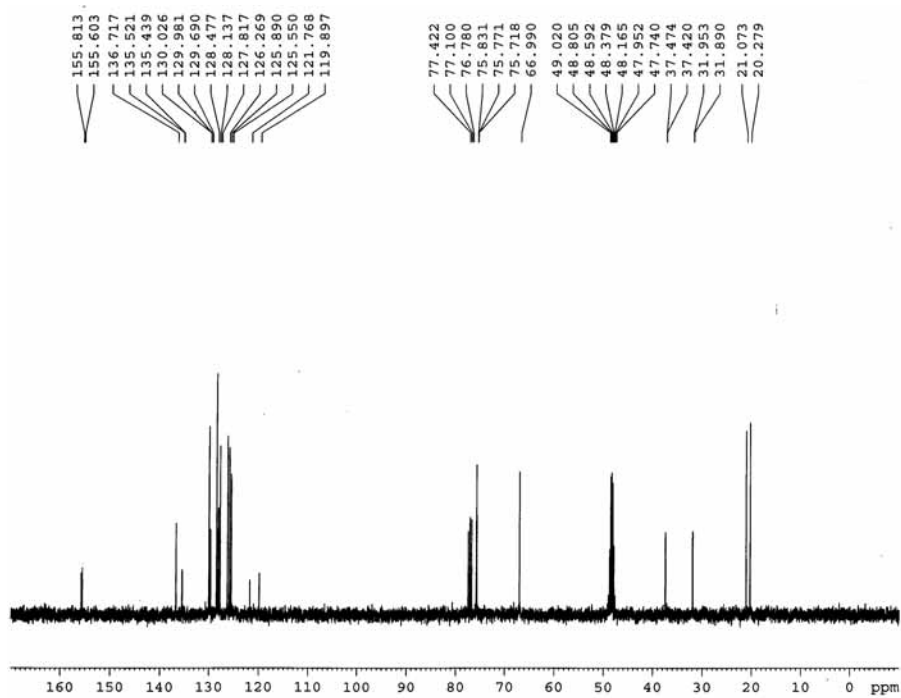

Figure S3b. <sup>13</sup>C NMR spectrum of compound (E)-8

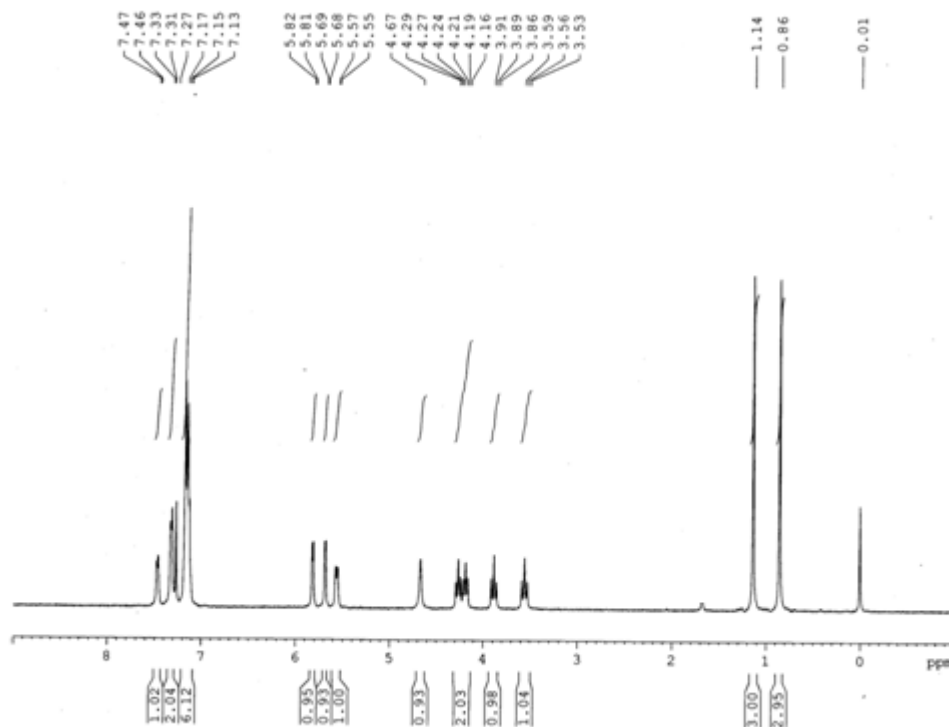

Figure S4a. <sup>1</sup>H NMR spectrum of compound 9

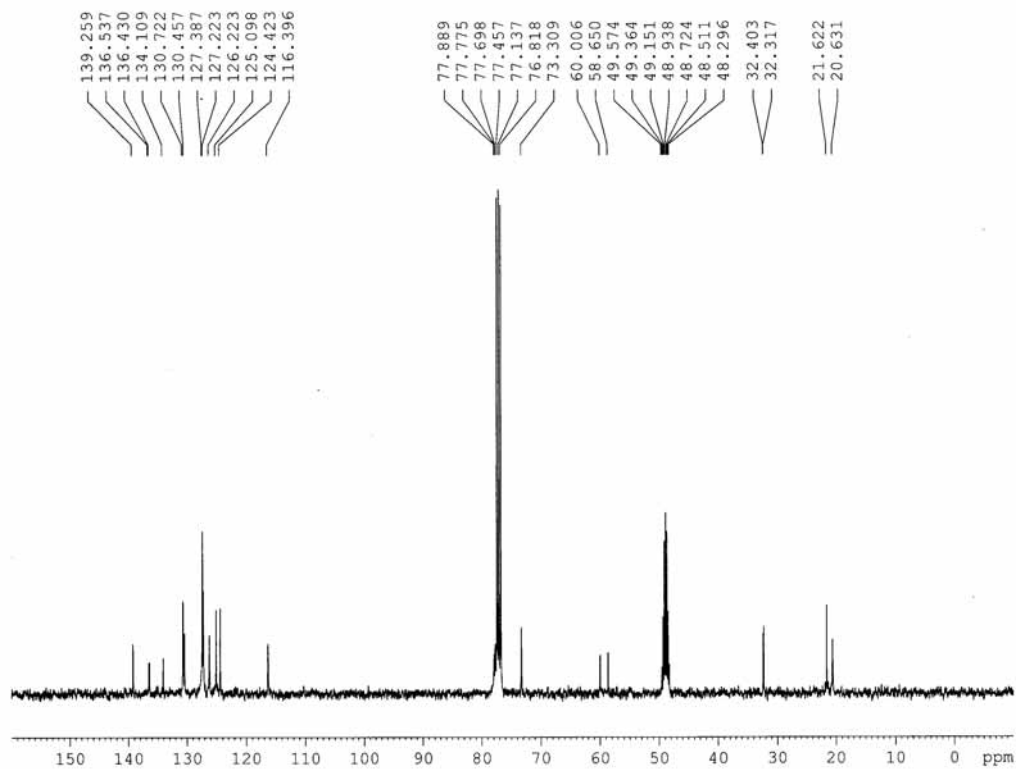

Figure S4b. <sup>13</sup>C NMR spectrum of compound 9

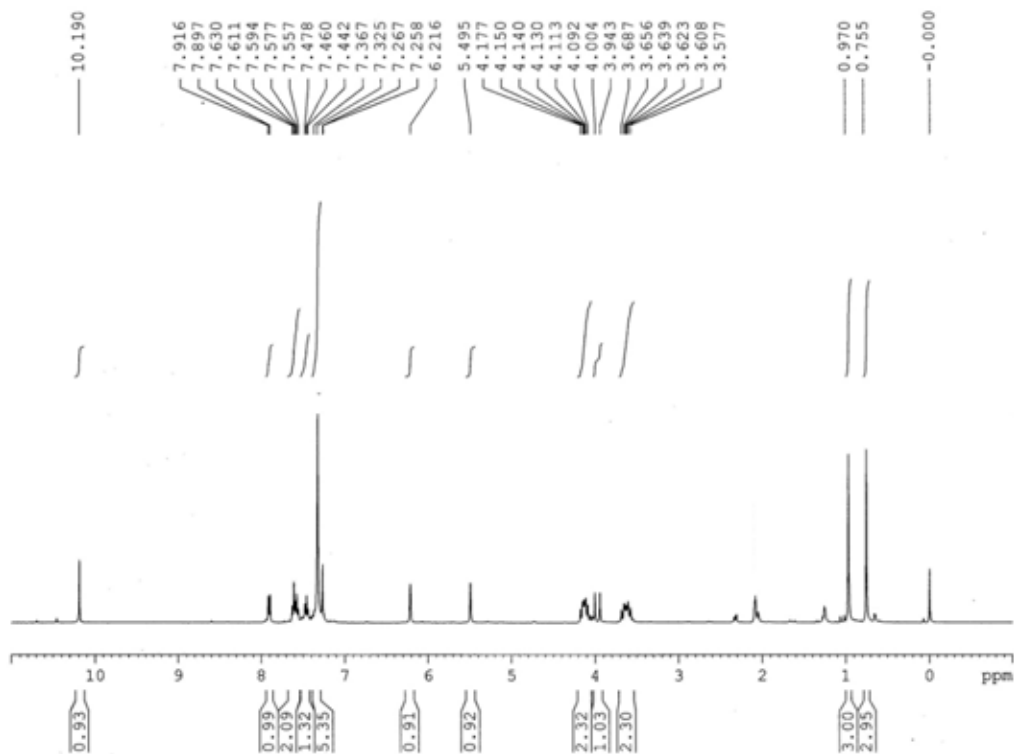

Figure S5a. <sup>1</sup>H NMR spectrum of compound 10

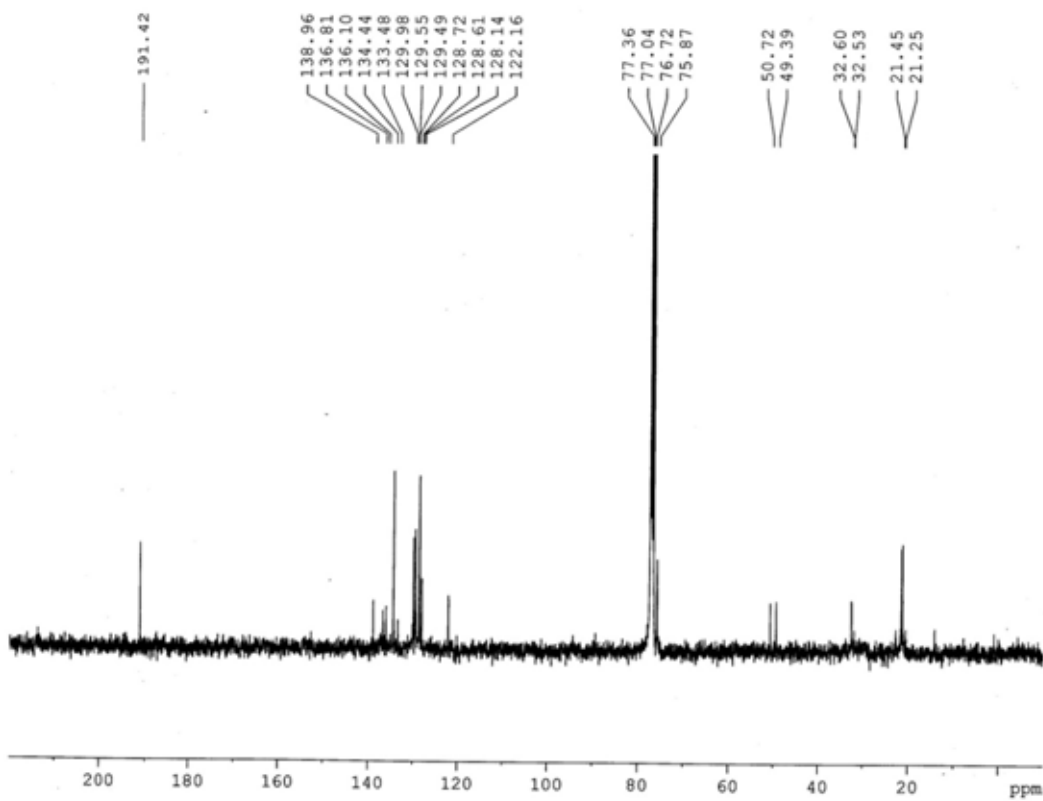

Figure S5b. <sup>13</sup>C NMR spectrum of compound 10

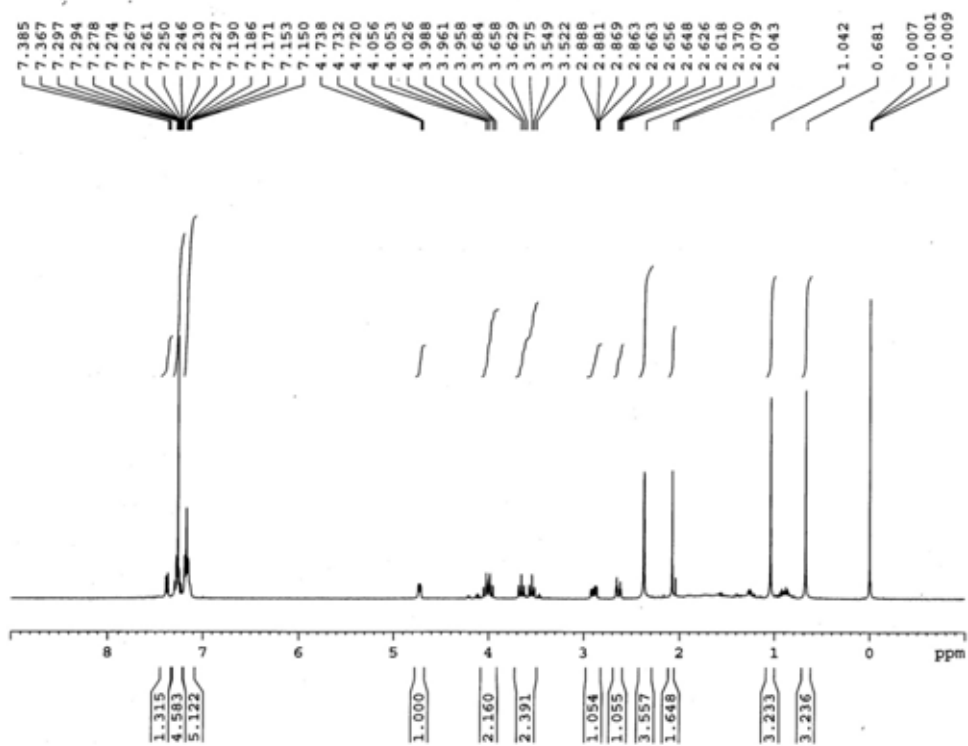

Figure S6a. <sup>1</sup>H NMR spectrum of compound (Z)-11

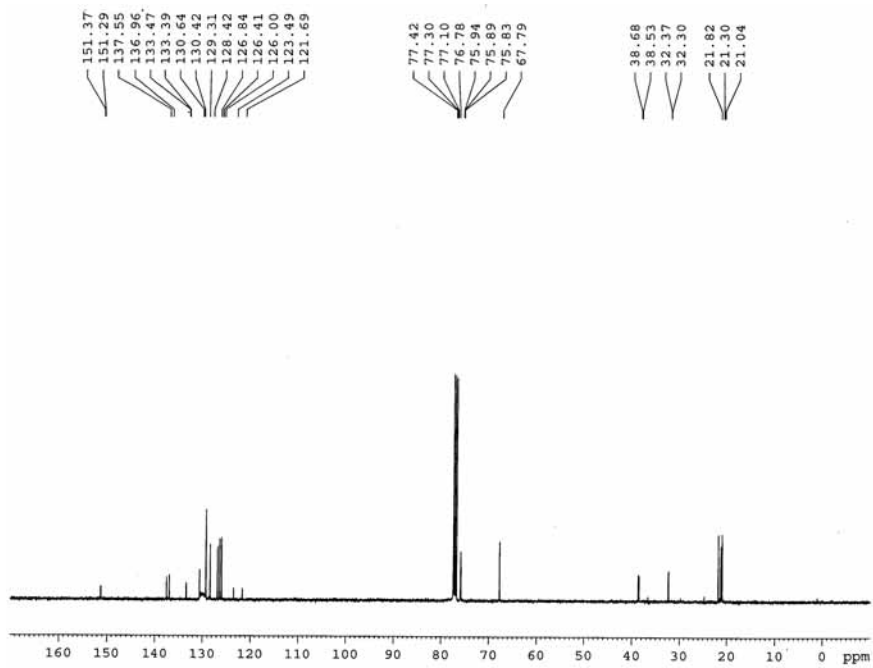

Figure S6b. <sup>13</sup>C NMR spectrum of compound (Z)-11

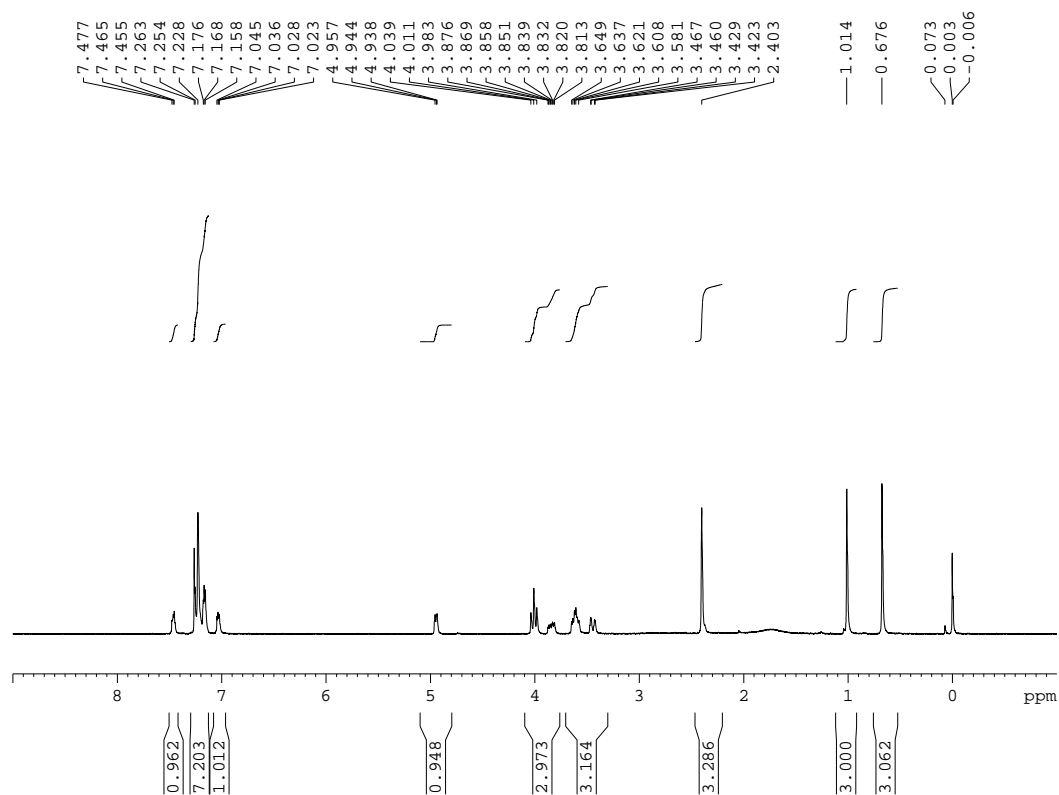

Figure S7a.  $^1\text{H}$  NMR spectrum of compound (*E*)-11

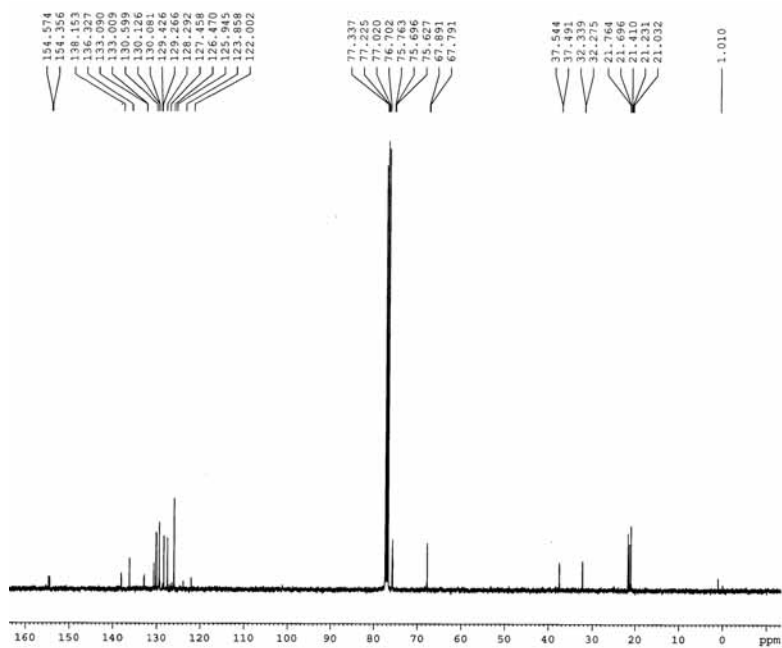

Figure S7b.  $^{13}\text{C}$  NMR spectrum of compound (*E*)-11



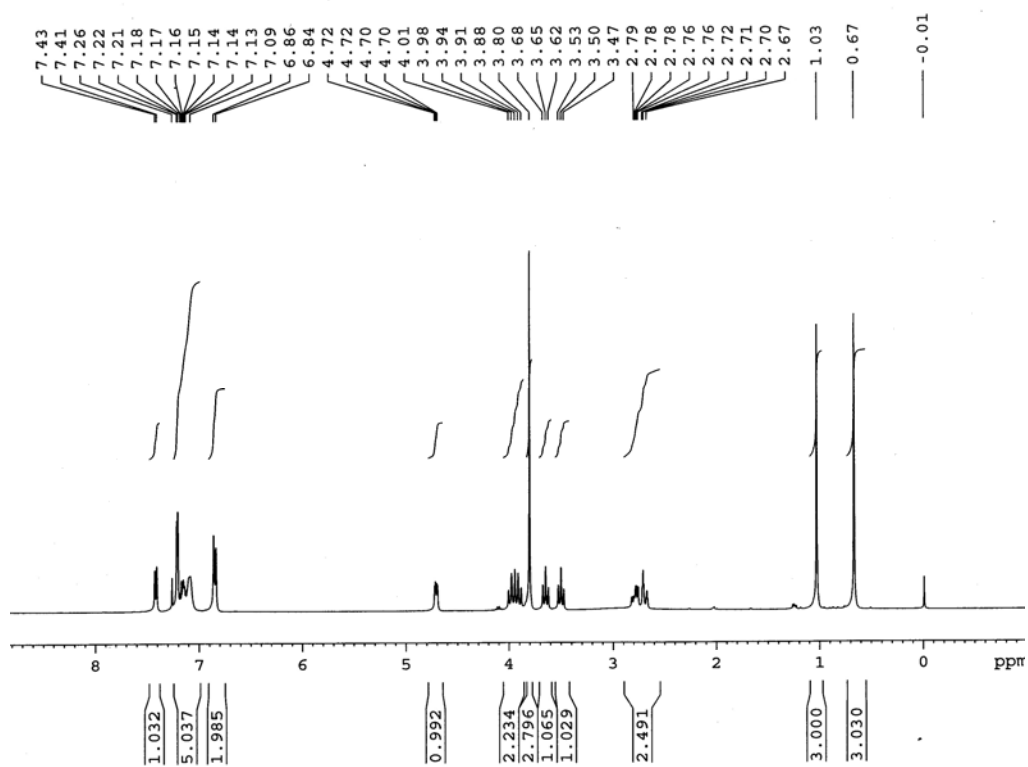

Figure S8a. <sup>1</sup>H NMR spectrum of compound (Z)-12

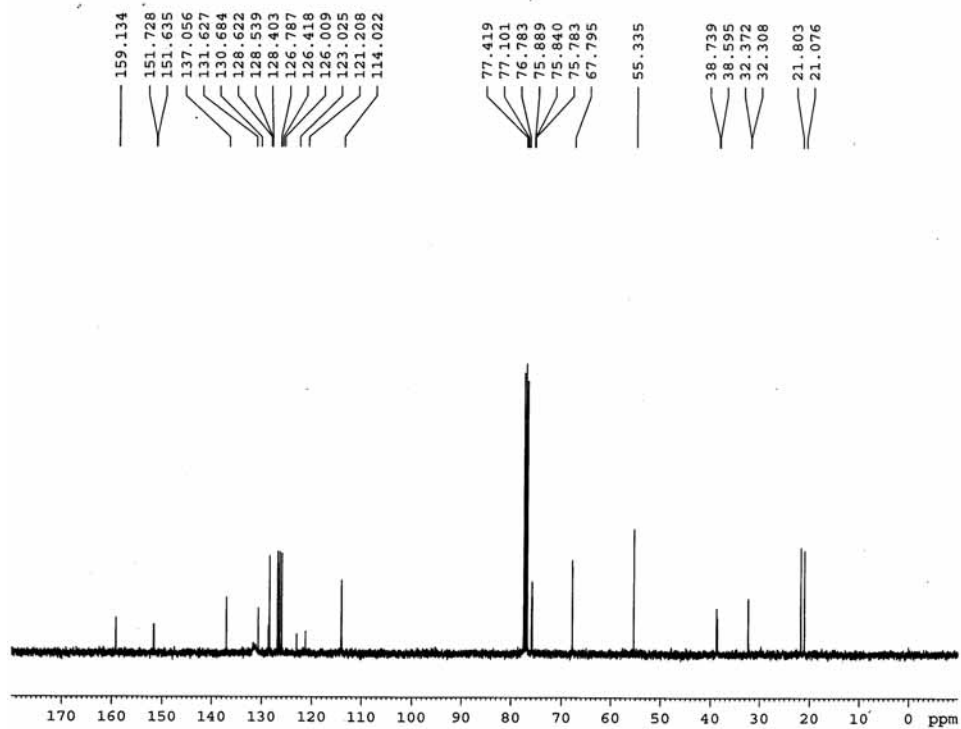

Figure S8b. <sup>13</sup>C NMR spectrum of compound (Z)-12

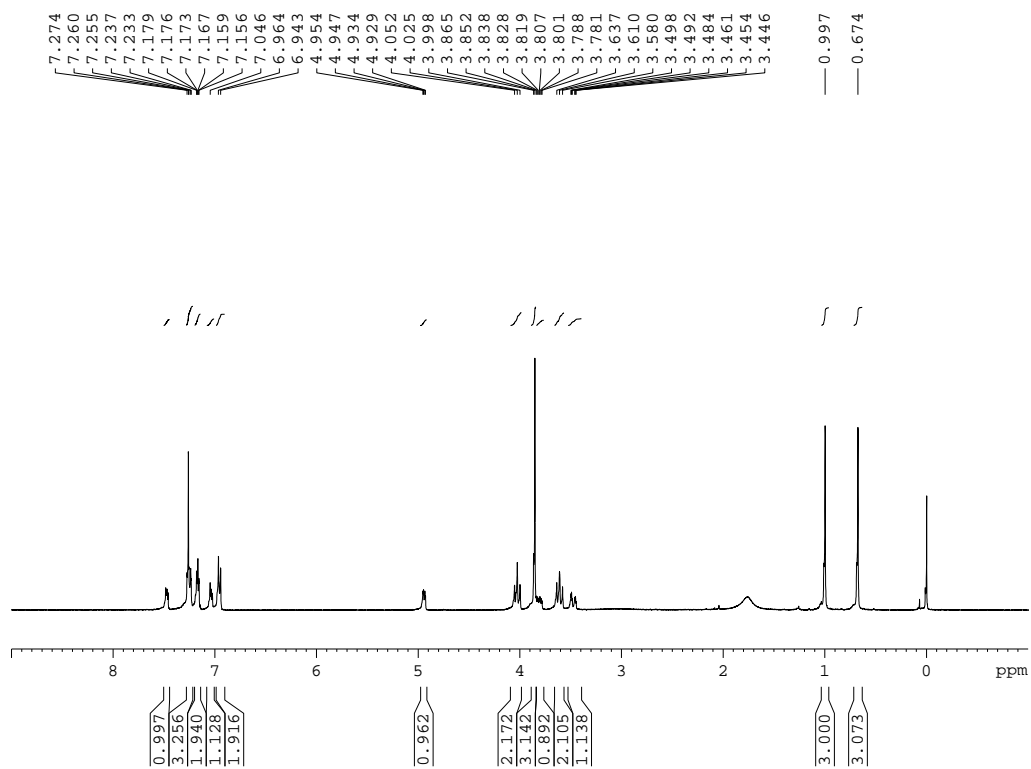

Figure S9a. <sup>1</sup>H NMR spectrum of compound (E)-12

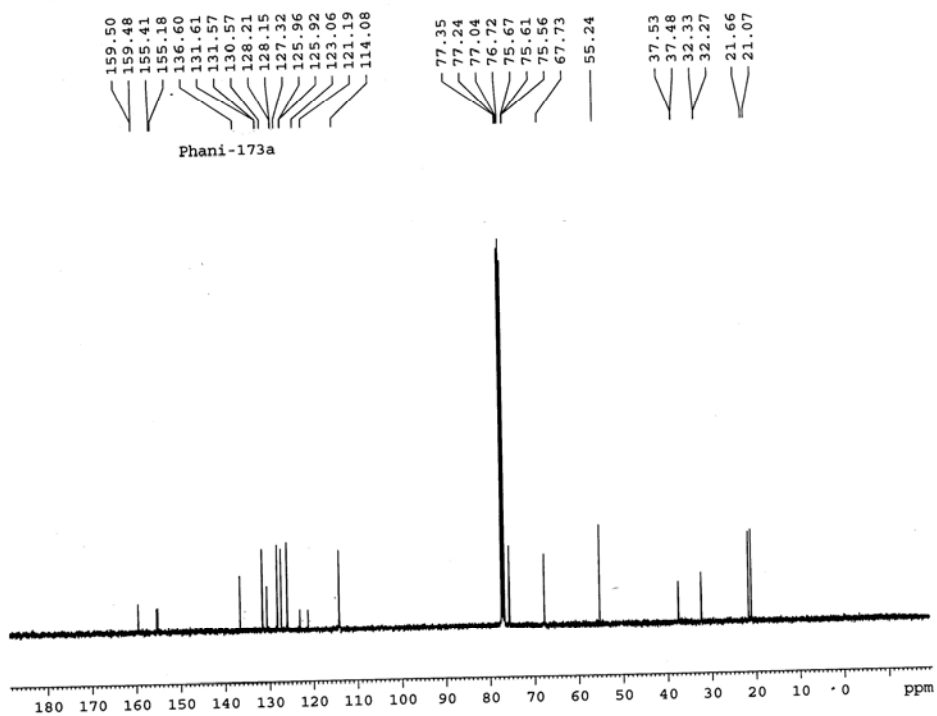

Figure S9b. <sup>13</sup>C NMR spectrum of compound (E)-12

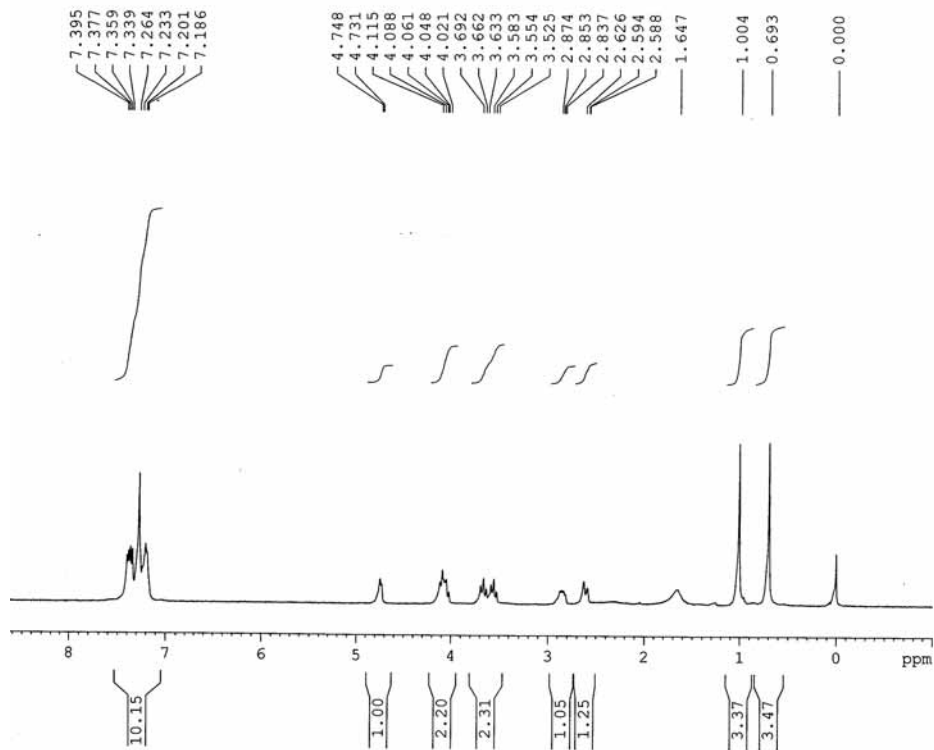

Figure S10a.  $^1\text{H}$  NMR spectrum of compound (Z)-13

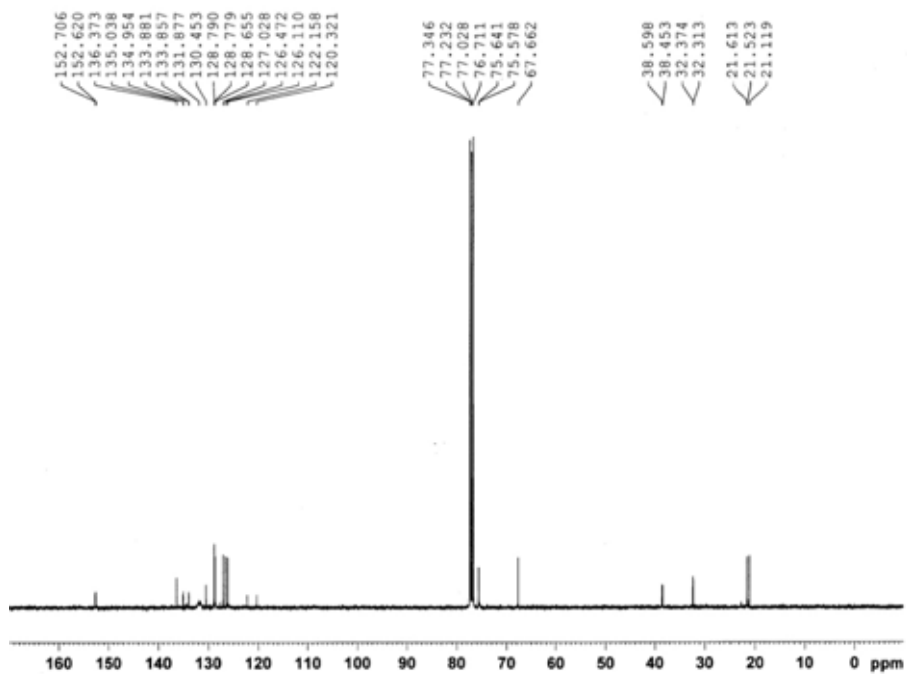

Figure S10b.  $^{13}\text{C}$  NMR spectrum of compound (Z)-13

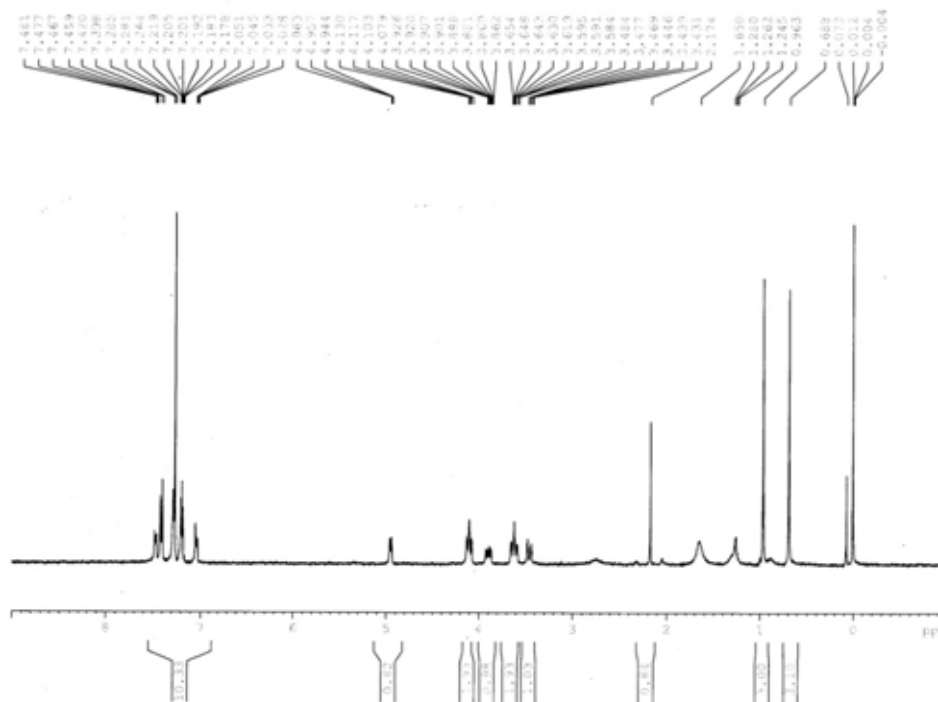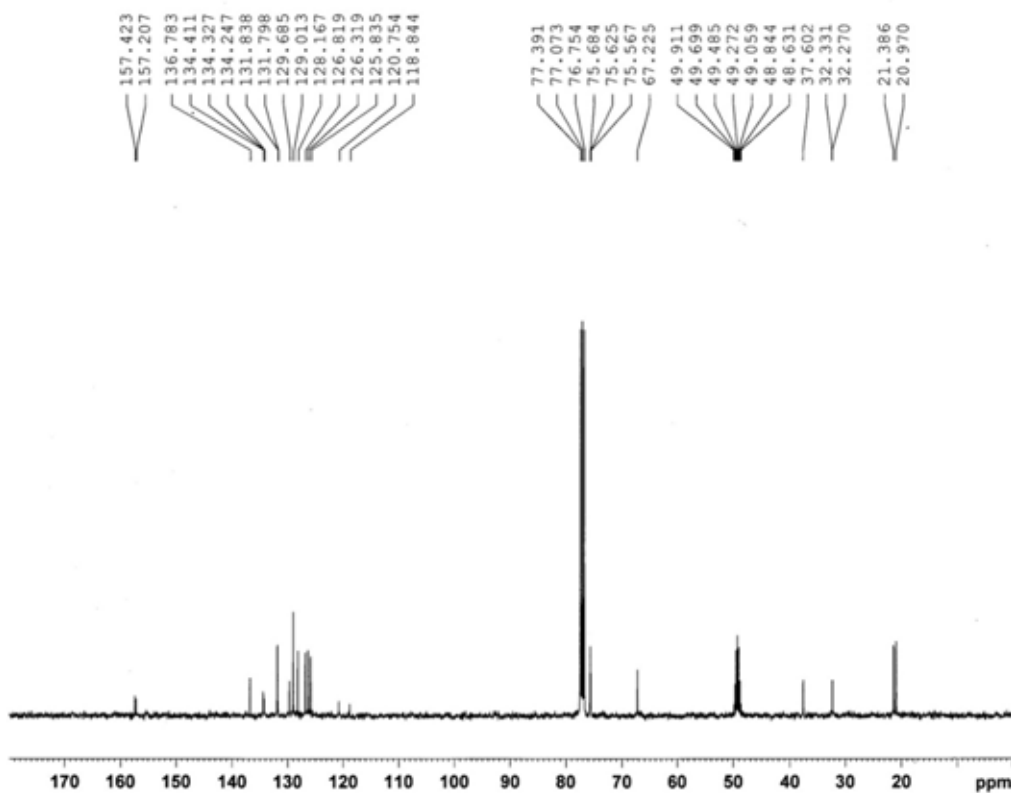

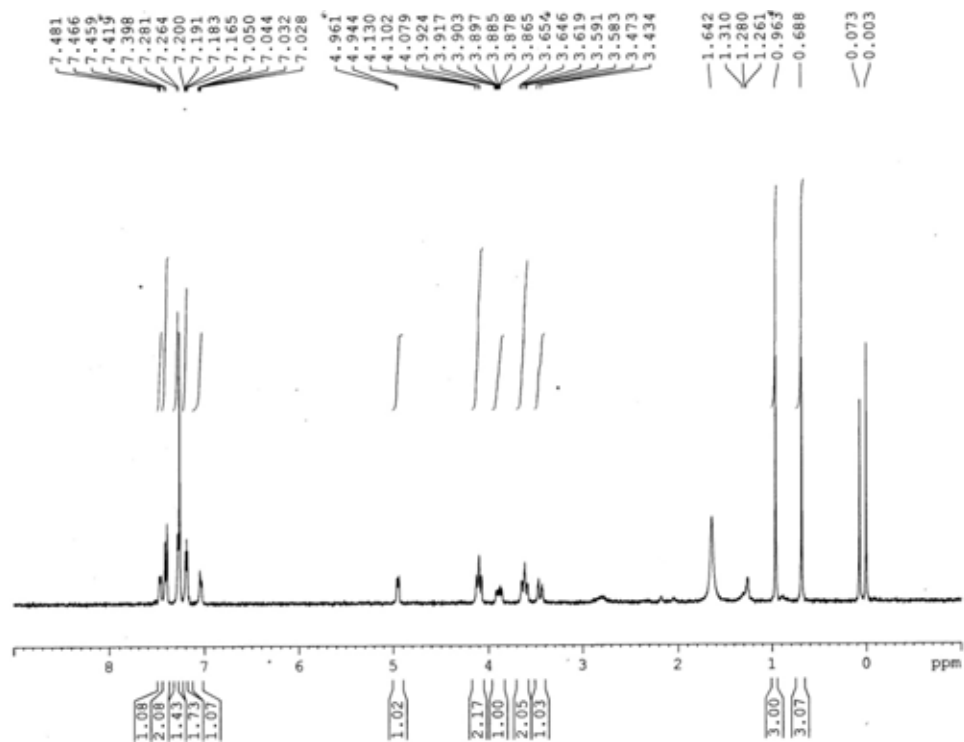

Figure S12a. <sup>1</sup>H NMR spectrum of compound (E)-14

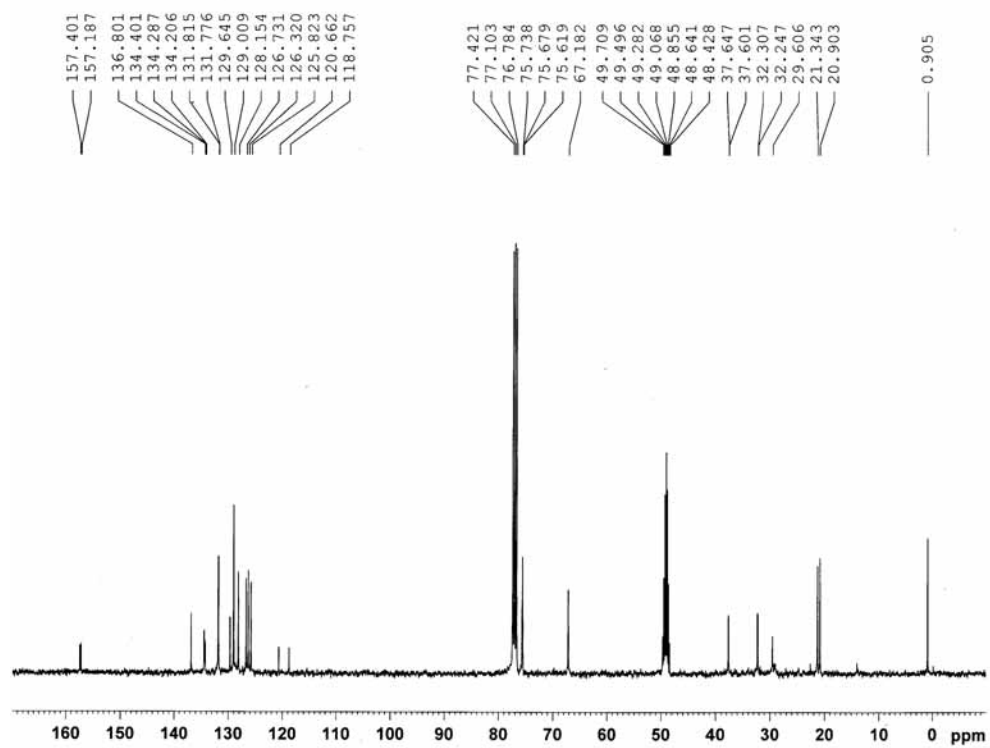

Figure S12b. <sup>13</sup>C NMR spectrum of compound (E)-14

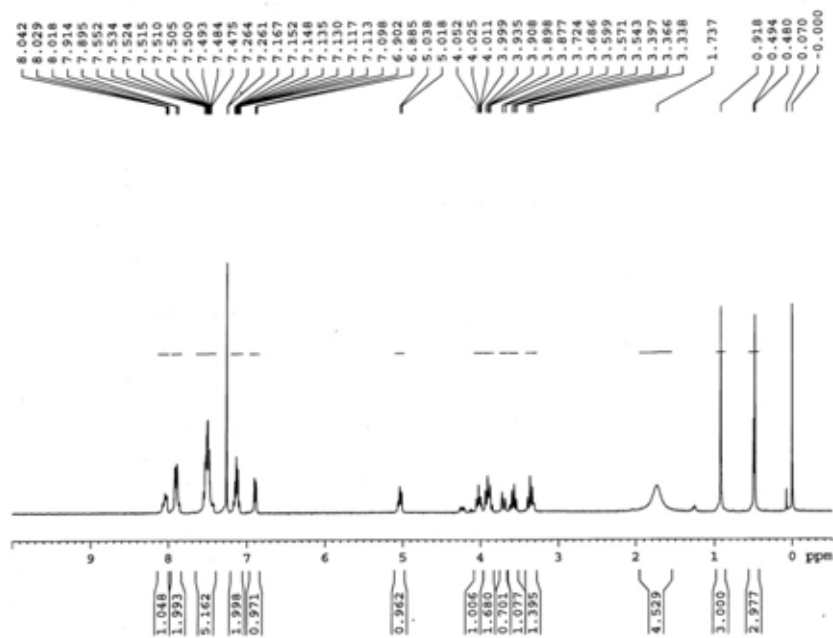

Figure S13a. <sup>1</sup>H NMR spectrum of compound 15

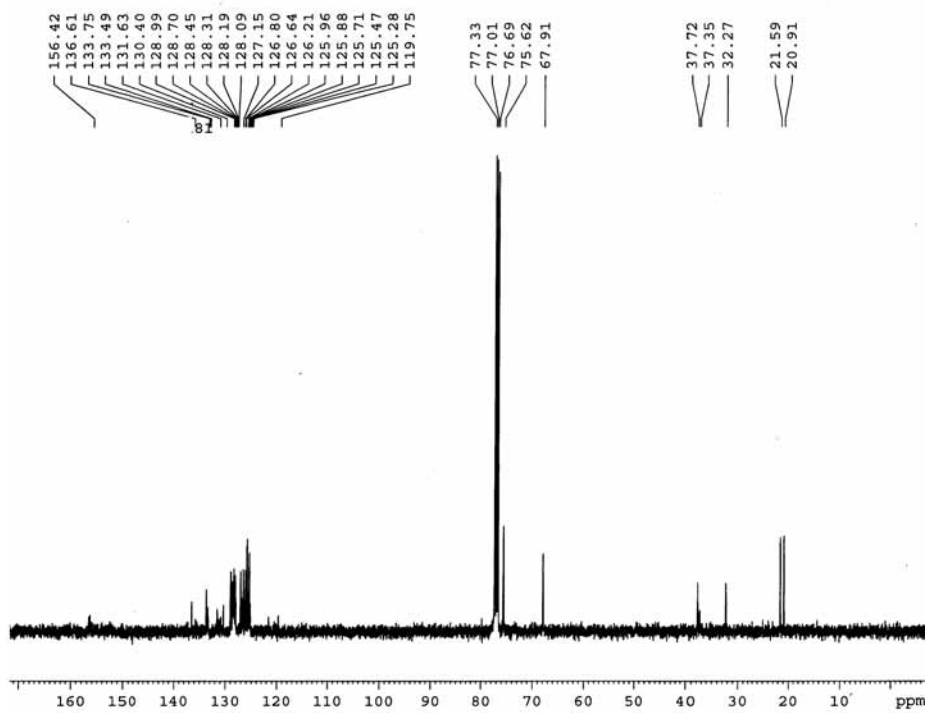

Figure S13b. <sup>13</sup>C NMR spectrum of compound 15

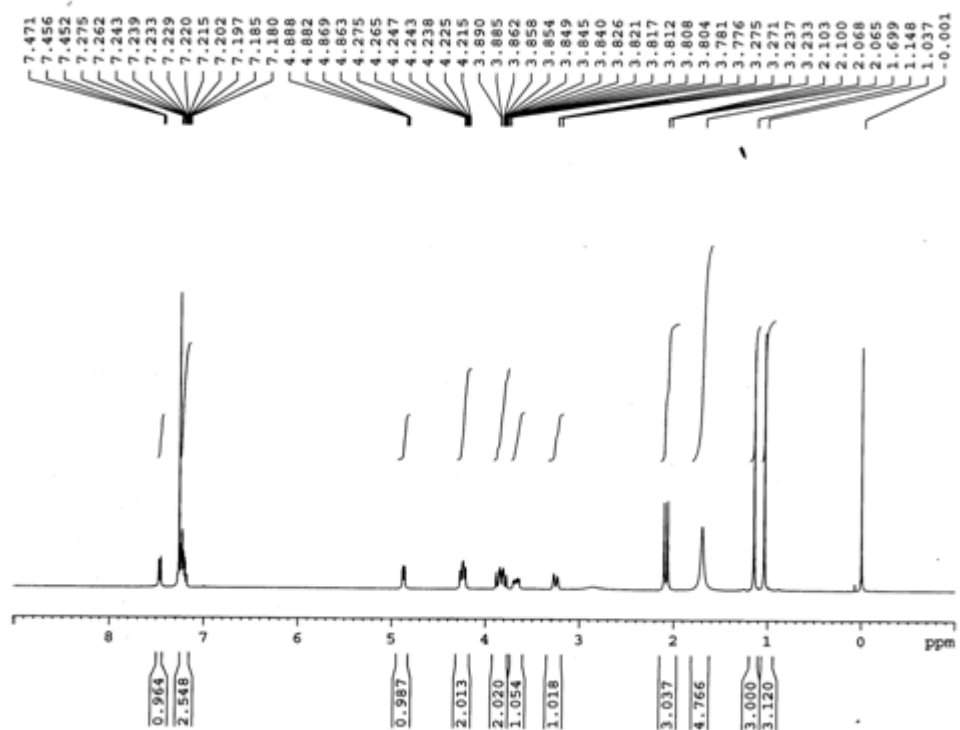

Figure S14a.  $^1\text{H}$  NMR spectrum of compound (*E*)-16

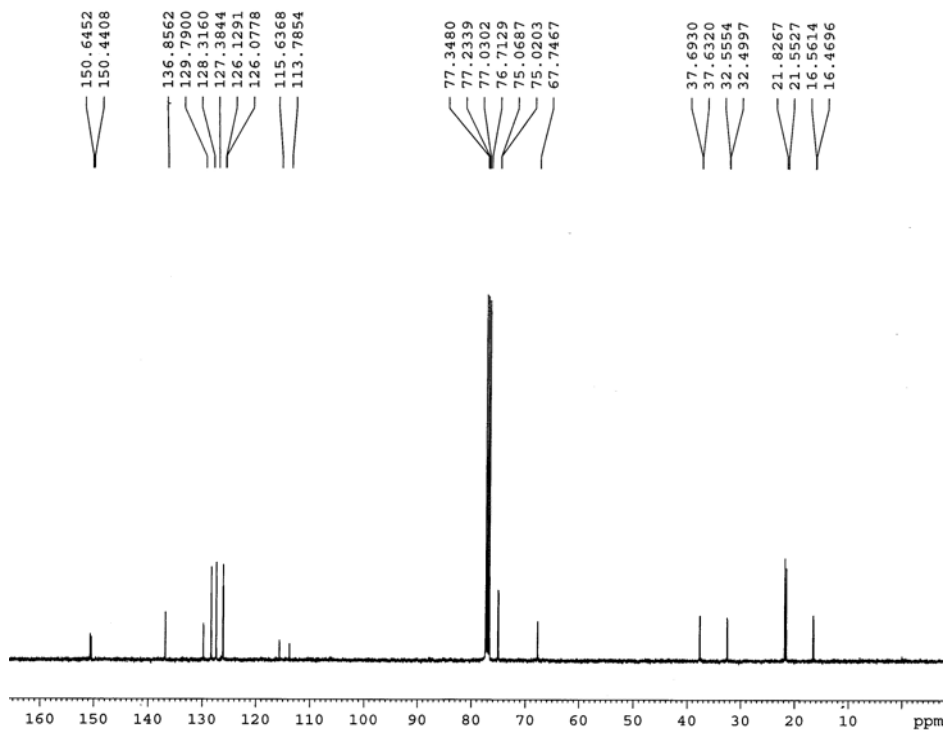

Figure S14b.  $^{13}\text{C}$  NMR spectrum of compound (*E*)-16

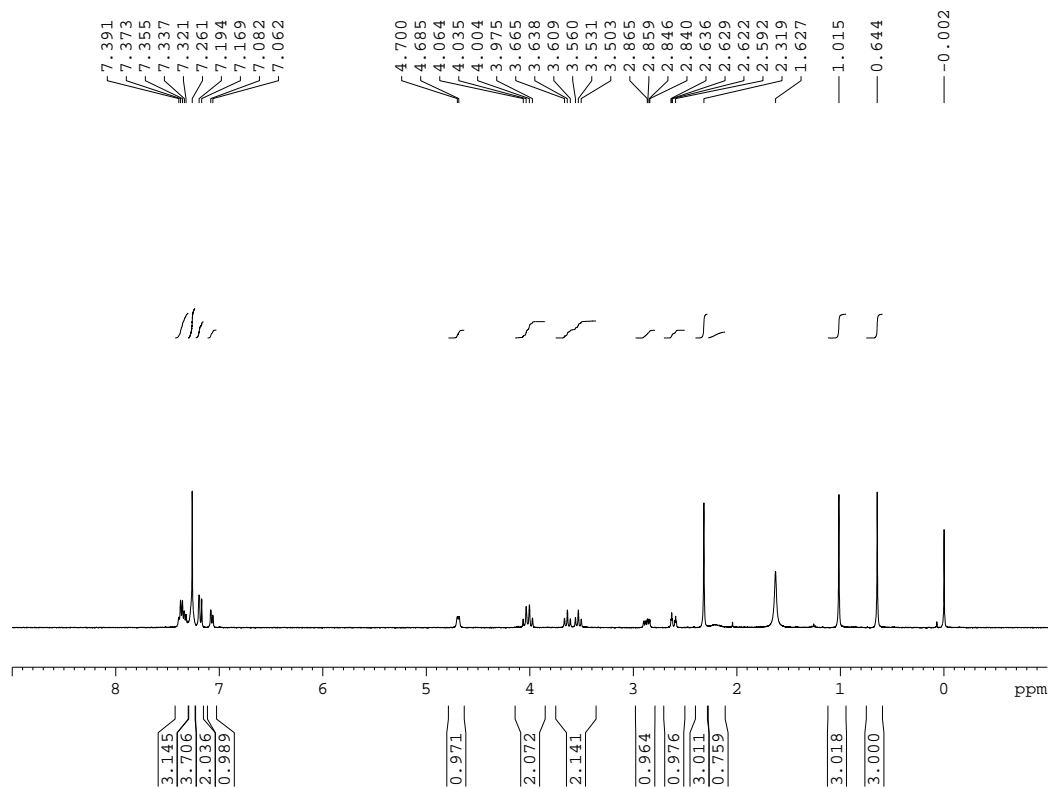

Figure S15a. <sup>1</sup>H NMR spectrum of compound (Z)-17

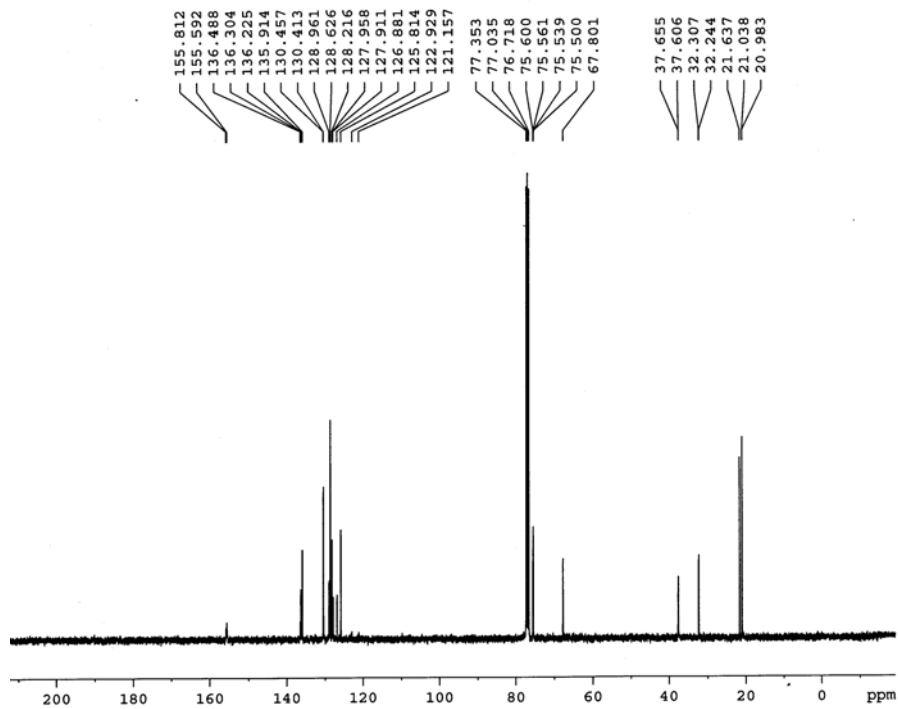

Figure S15b. <sup>13</sup>C NMR spectrum of compound (Z)-17



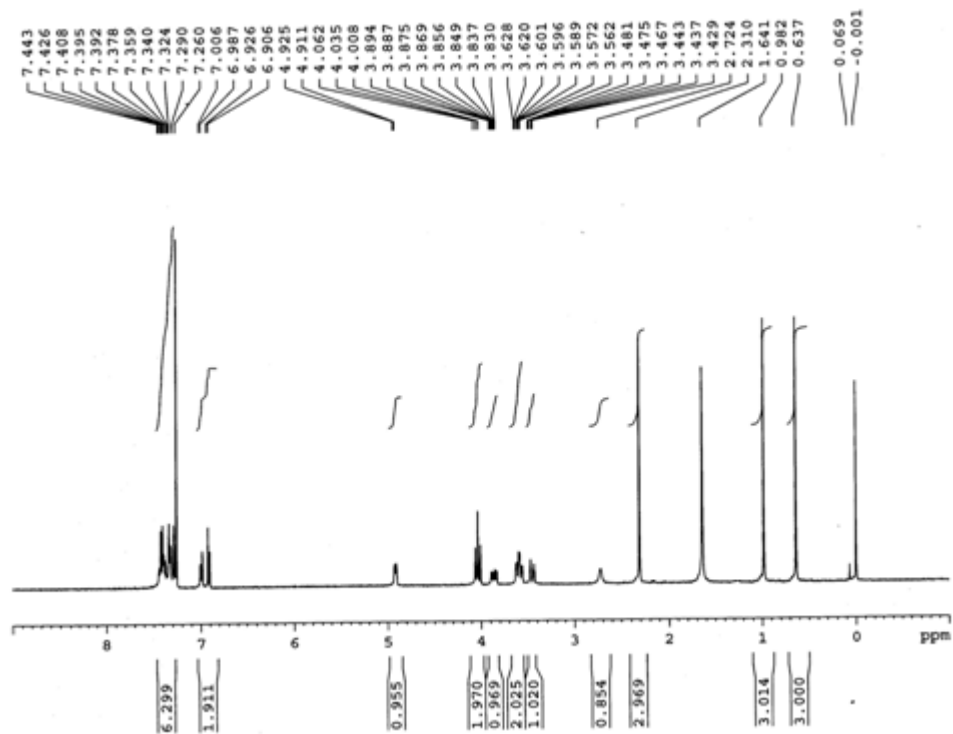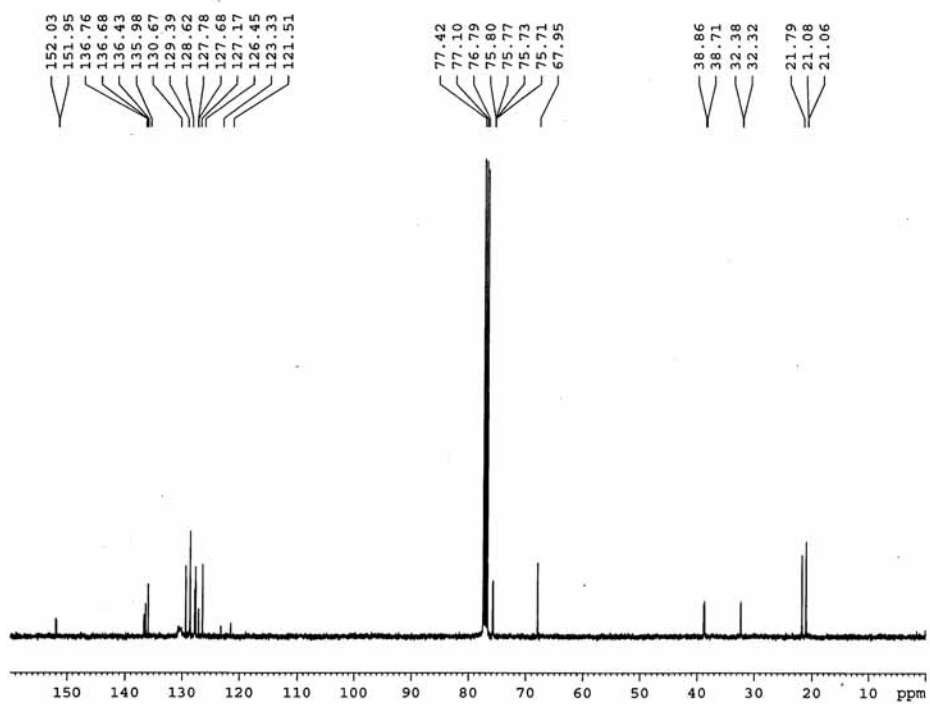

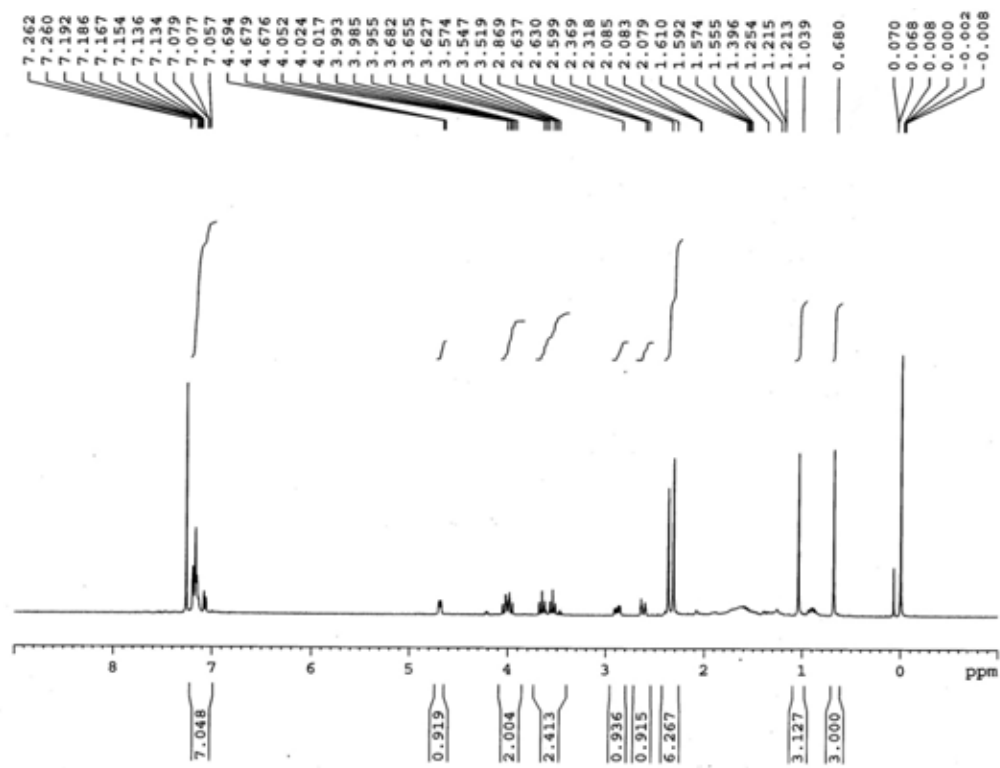

Figure S17a.  $^1\text{H}$  NMR spectrum of compound (Z)-18

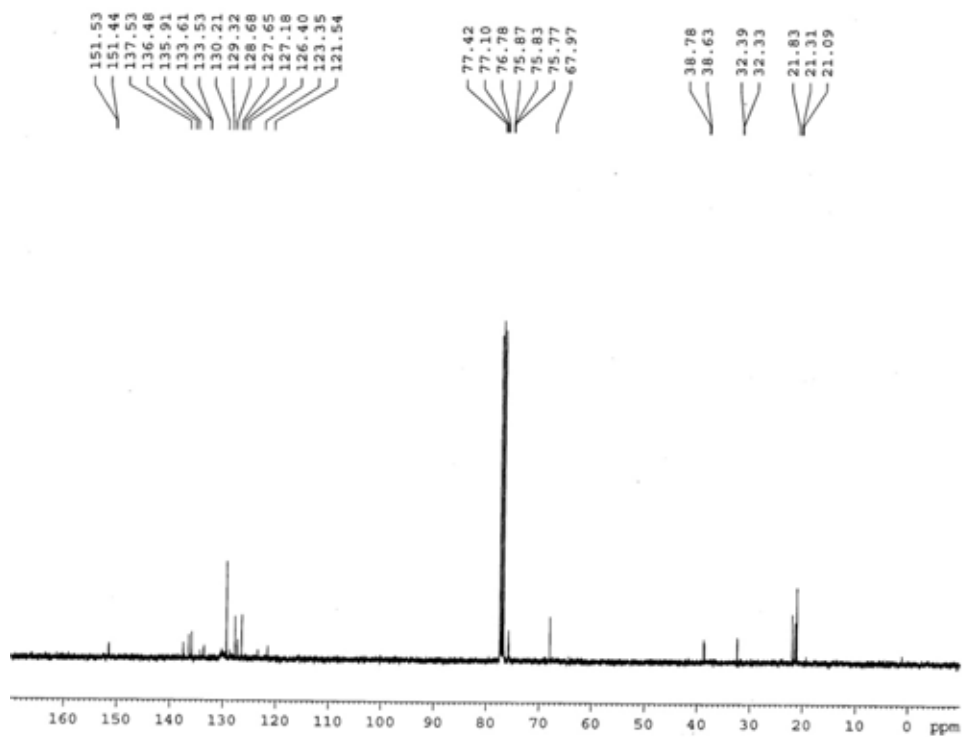

Figure S17b.  $^{13}\text{C}$  NMR spectrum of compound (Z)-18

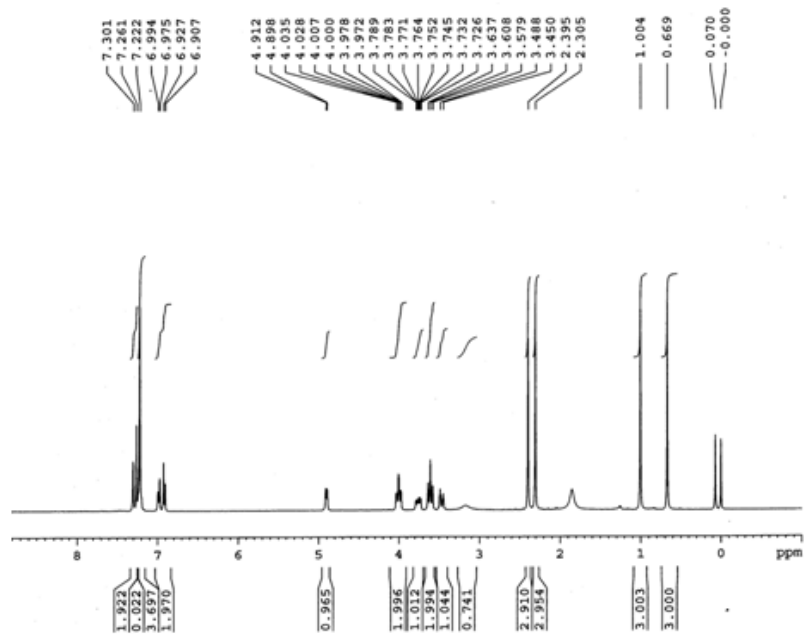

Figure S18a. <sup>1</sup>H NMR spectrum of compound (E)-18

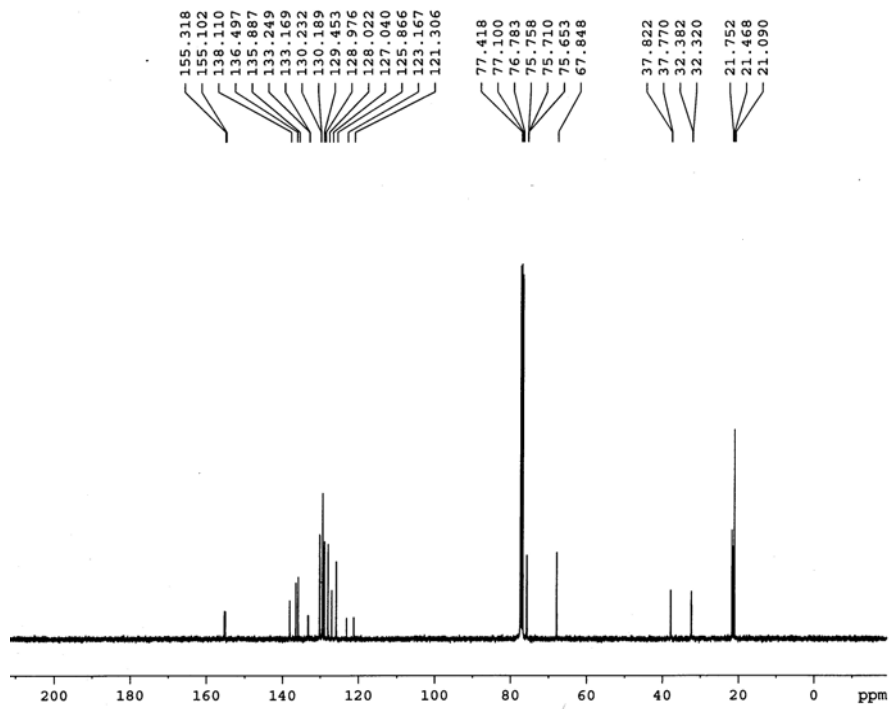

Figure S18b. <sup>13</sup>C NMR spectrum of compound (E)-18

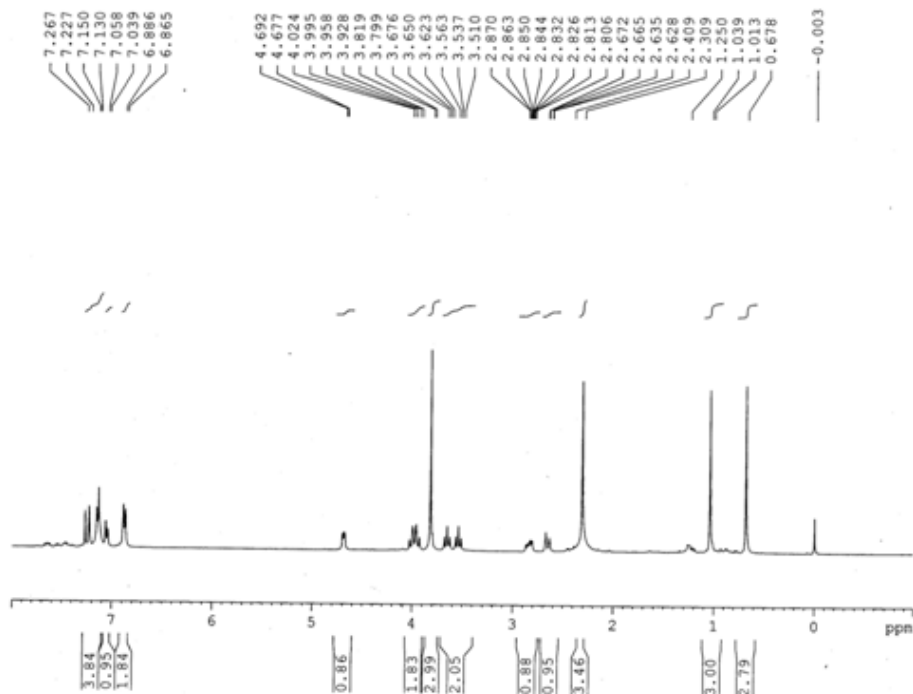

Figure S19a.  $^1\text{H}$  NMR spectrum of compound (Z)-19

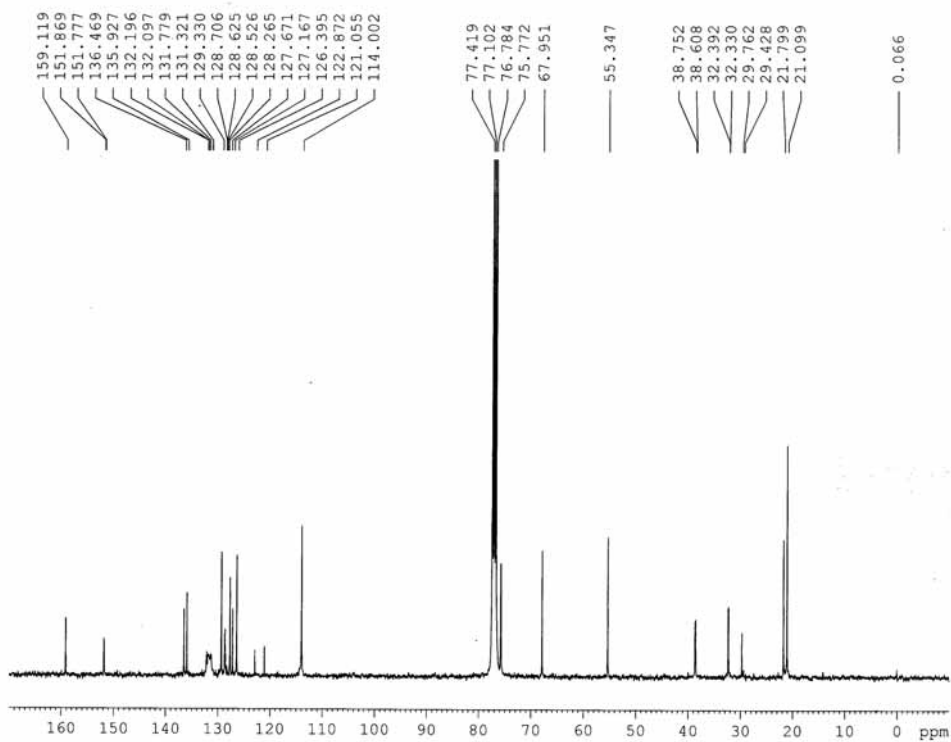

Figure S19b.  $^{13}\text{C}$  NMR spectrum of compound (Z)-19

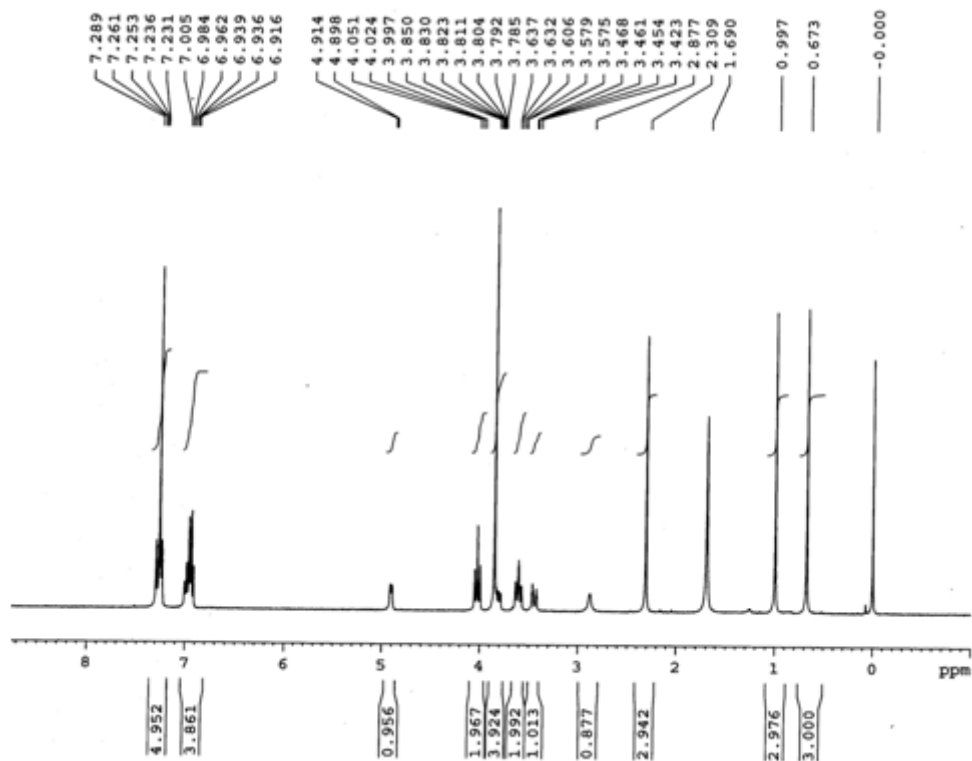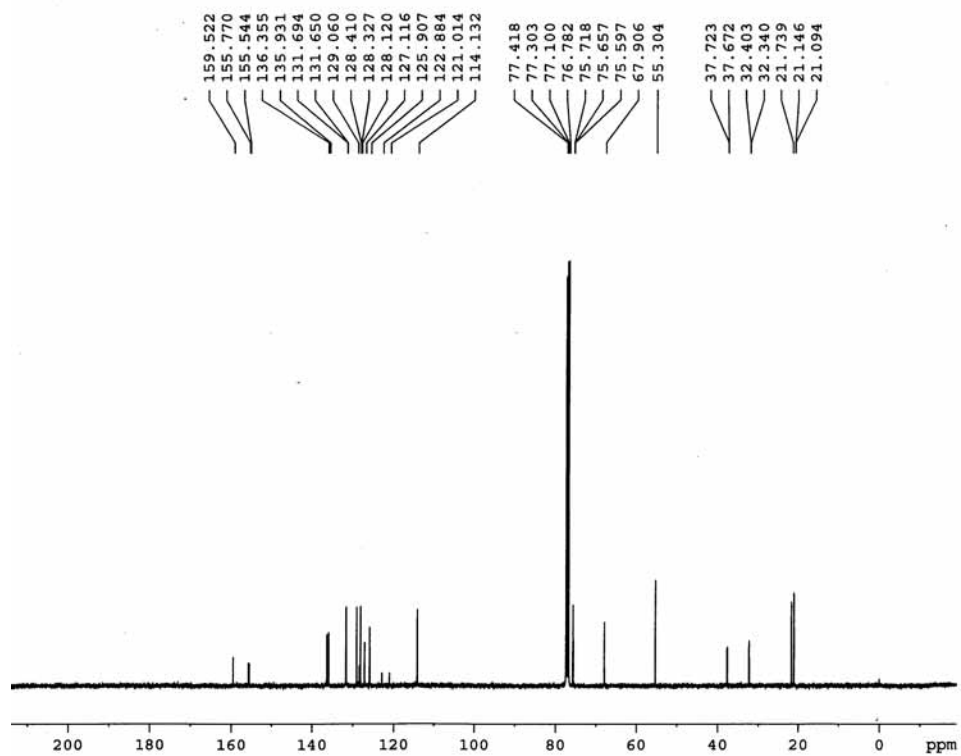

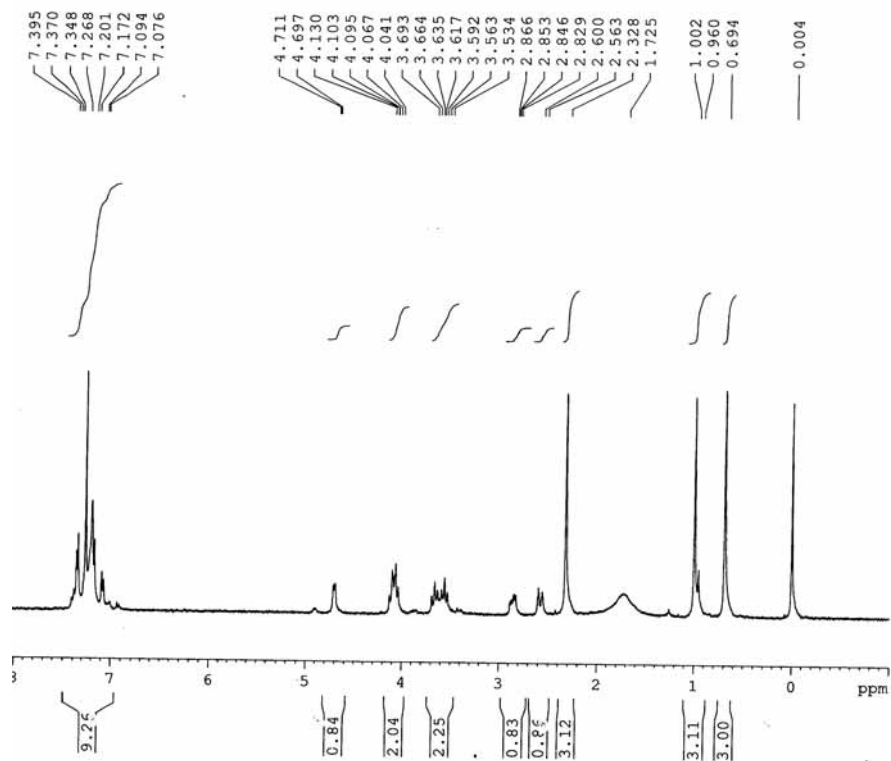

Figure S21a.  $^1\text{H}$  NMR spectrum of compound (Z)-20

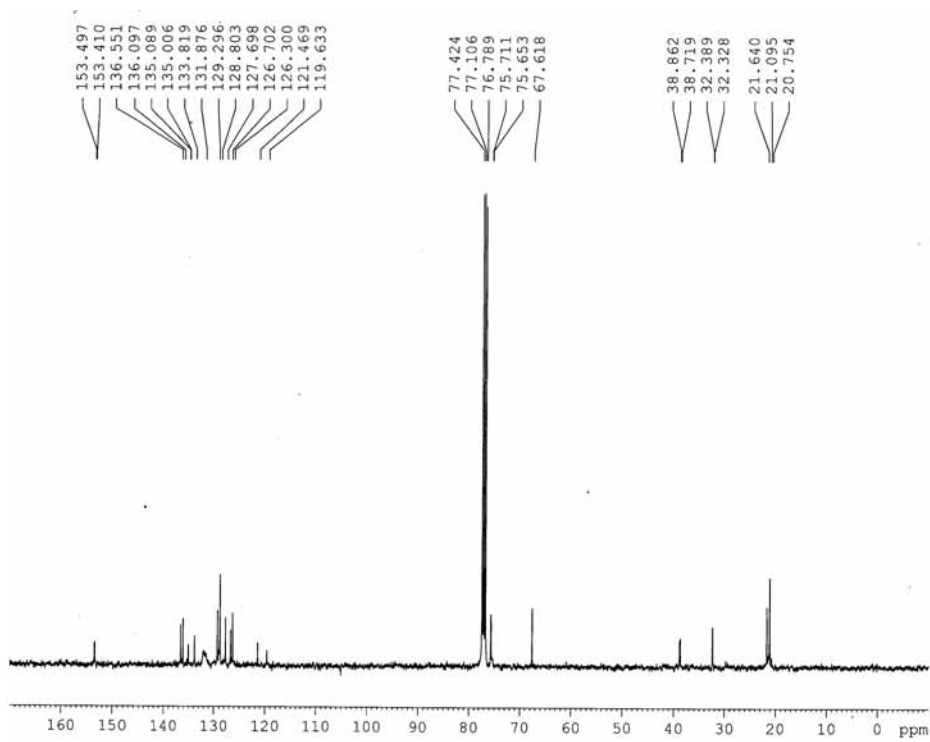

Figure S21b.  $^{13}\text{C}$  NMR spectrum of compound (Z)-20

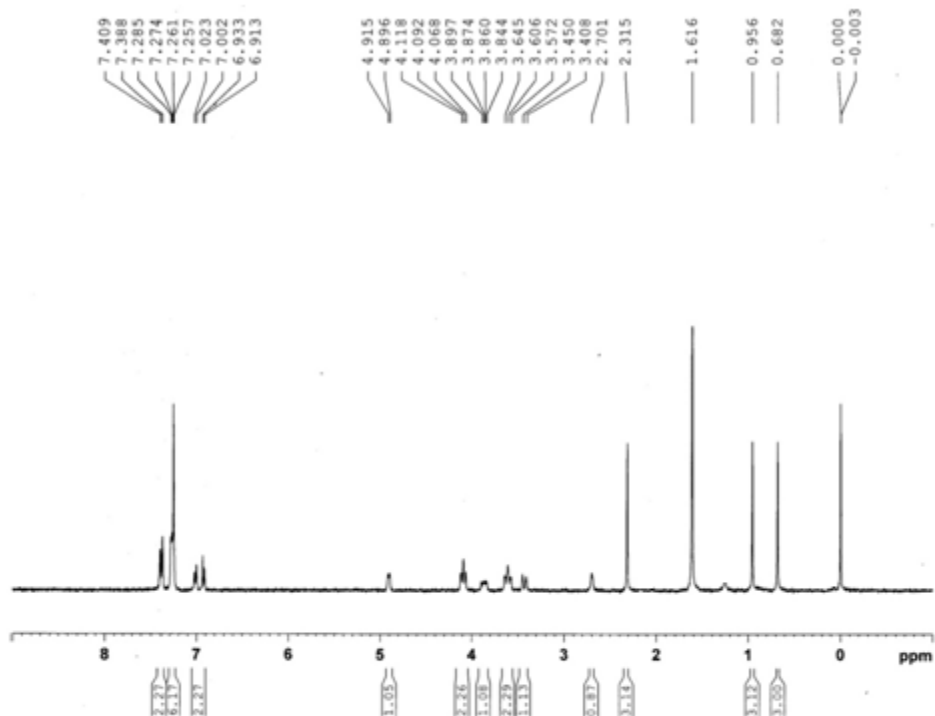

Figure S22a. <sup>1</sup>H NMR spectrum of compound (E)-20

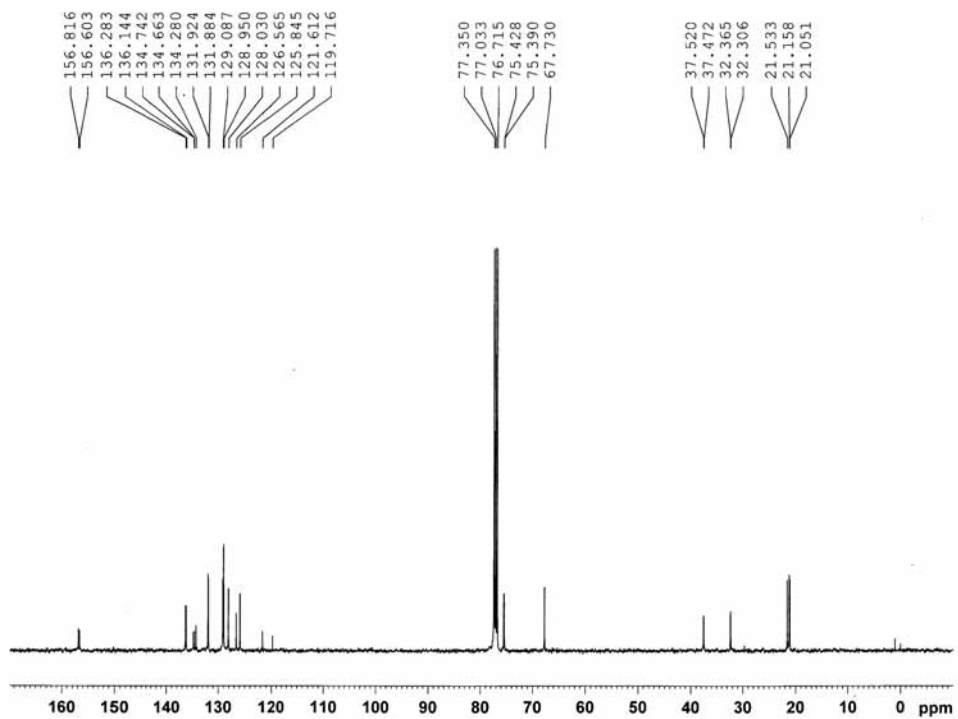

Figure S22b. <sup>13</sup>C NMR spectrum of compound (E)-20

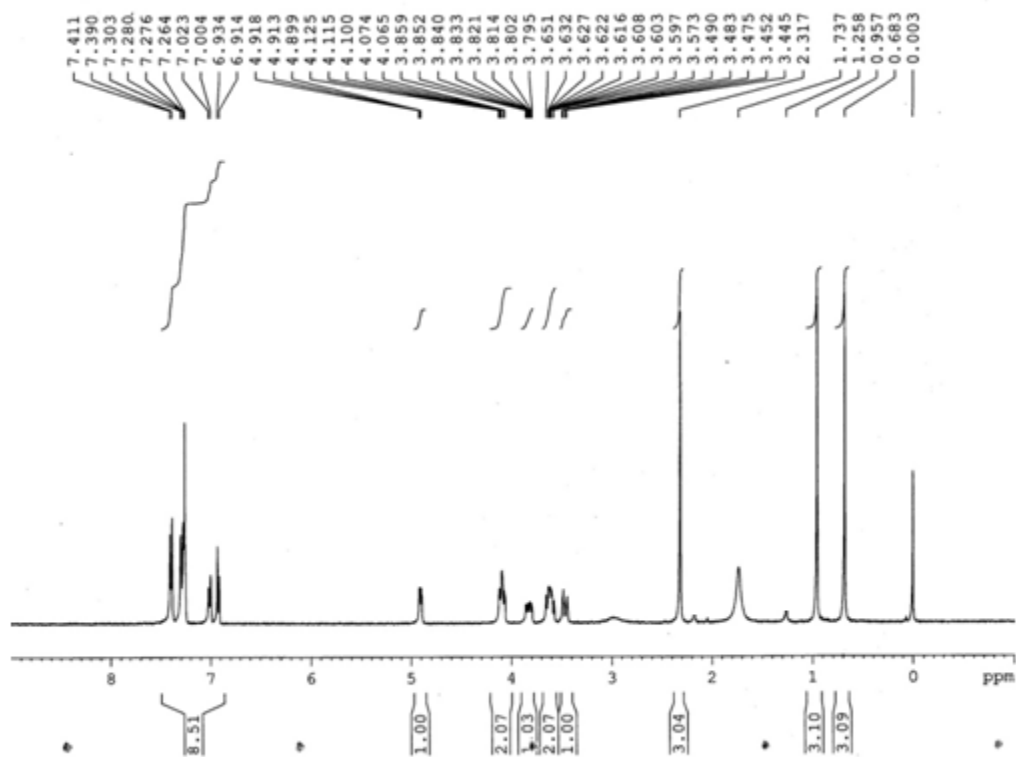

Figure S23a.  $^1\text{H}$  NMR spectrum of compound (*E*)-21

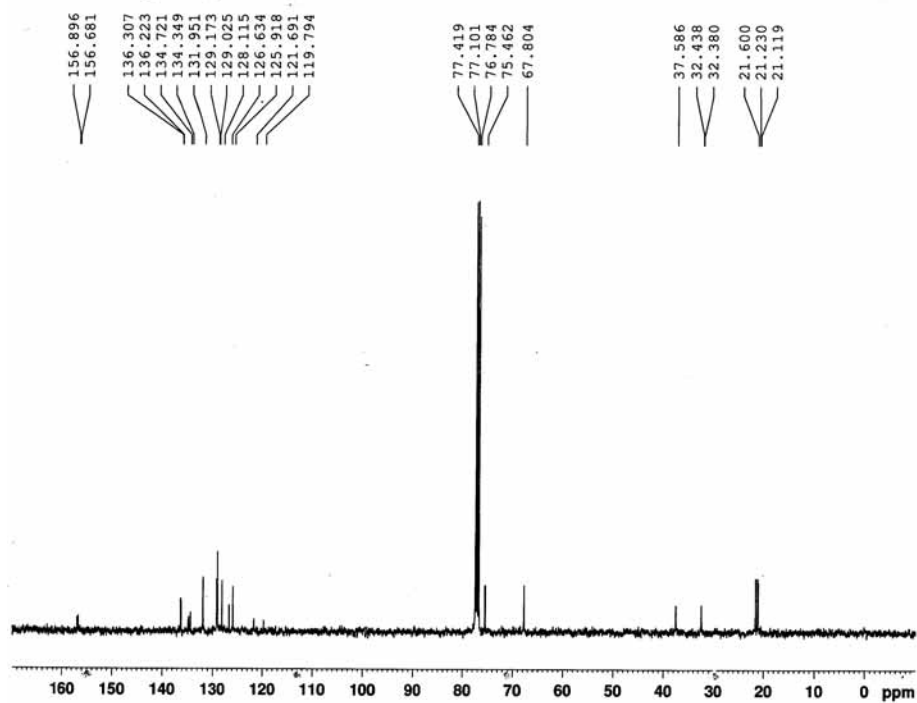

Figure S23b.  $^{13}\text{C}$  NMR spectrum of compound (*E*)-21



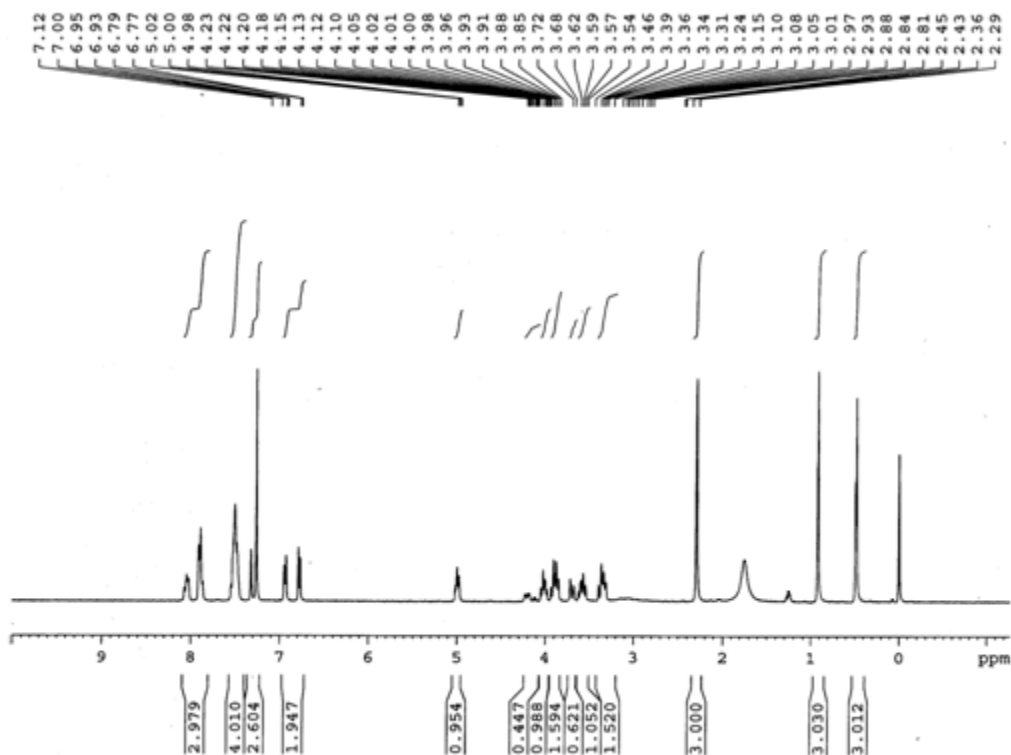

Figure S24a.  $^1\text{H}$  NMR spectrum of compound 22

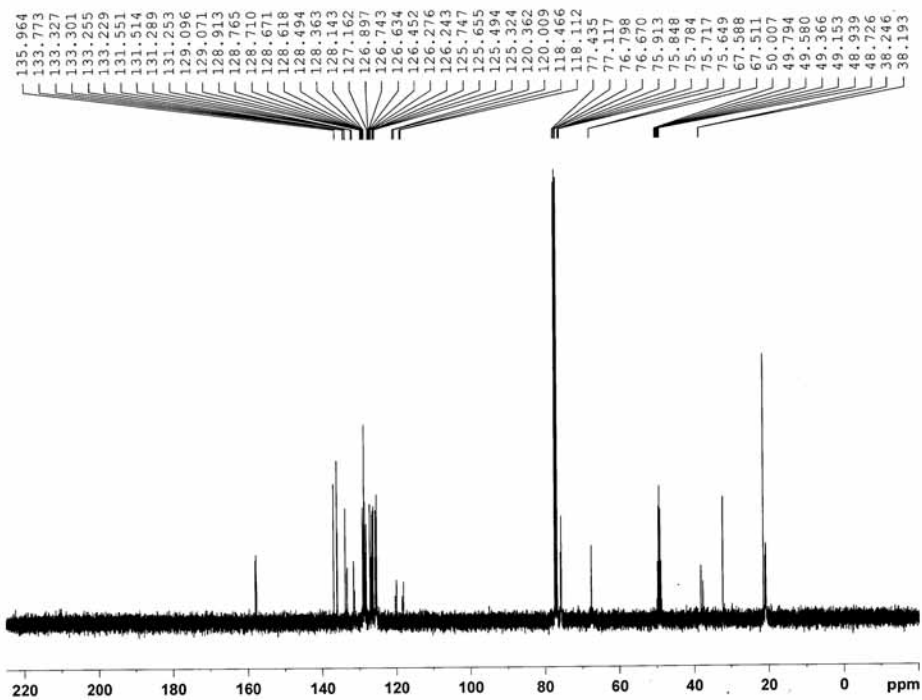

Figure S24b.  $^{13}\text{C}$  NMR spectrum of compound 22

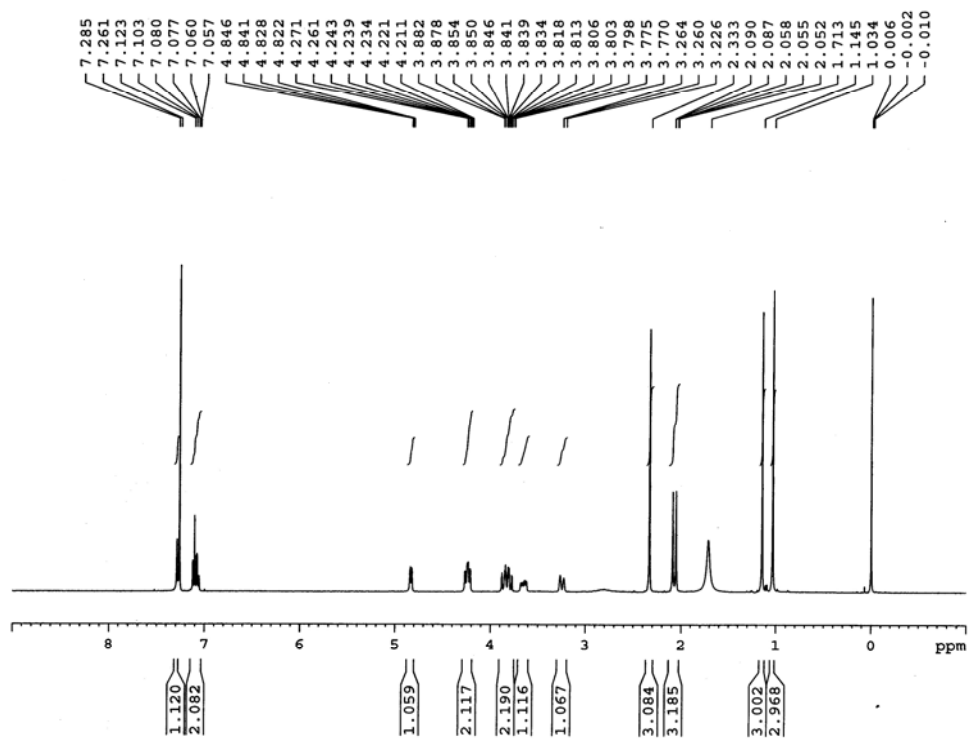

Figure S25a.  $^1\text{H}$  NMR spectrum of compound (*E*)-23

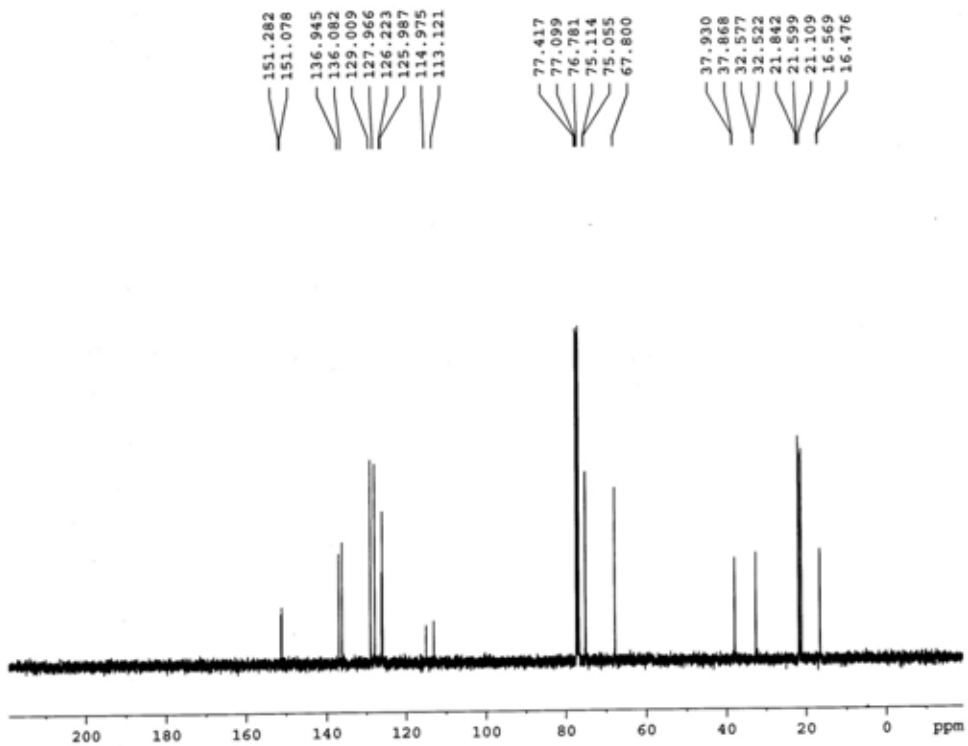

Figure S25b.  $^{13}\text{C}$  NMR spectrum of compound (*E*)-23

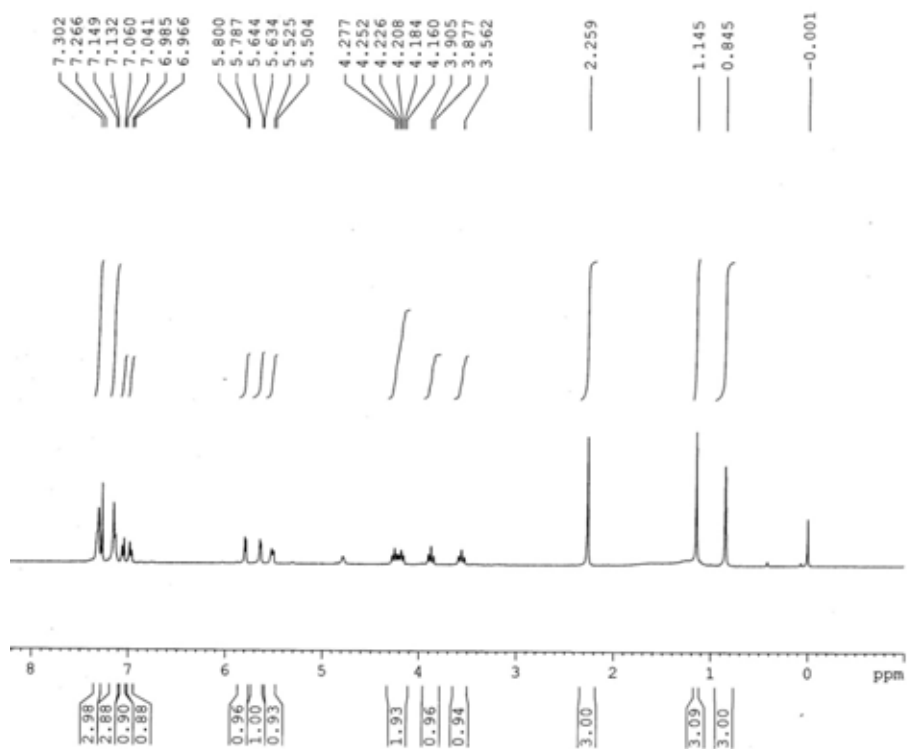

Figure S26a. <sup>1</sup>H NMR spectrum of compound 24

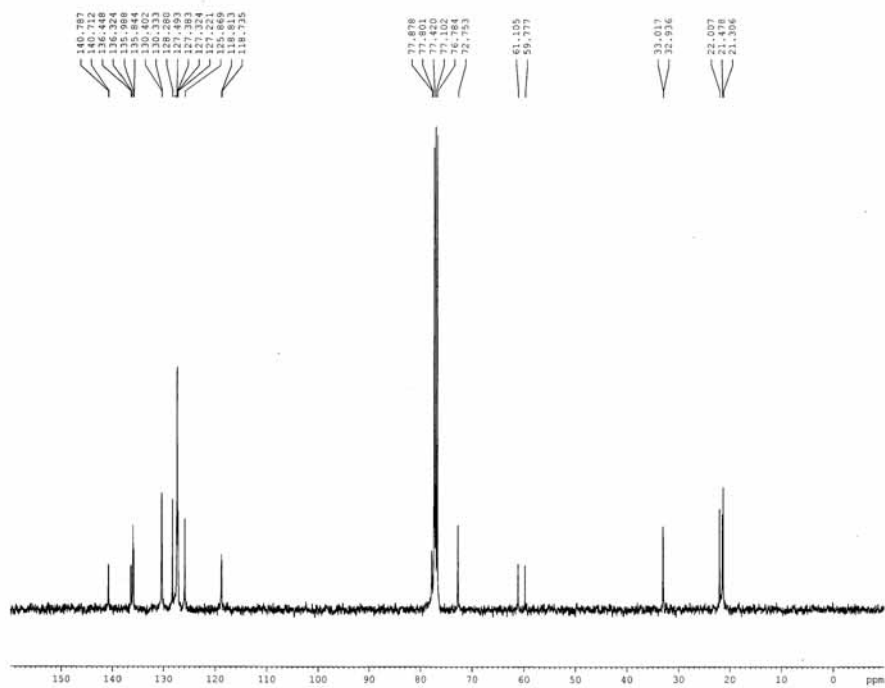

Figure S26b. <sup>13</sup>C NMR spectrum of compound 24

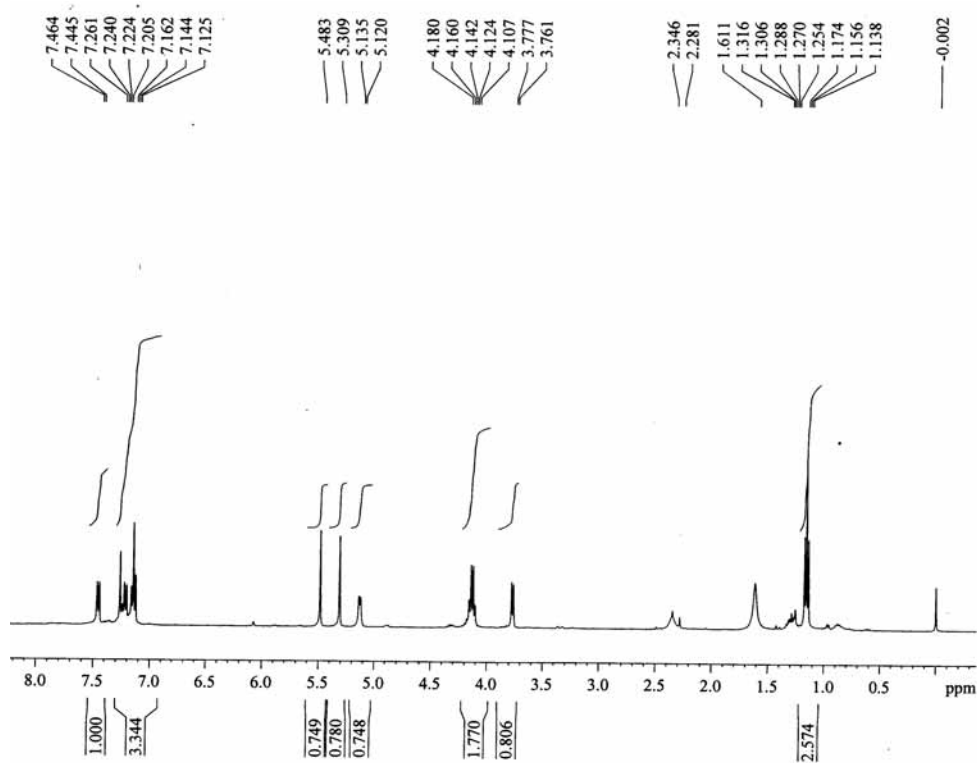

Figure S27a. <sup>1</sup>H NMR spectrum of compound 25

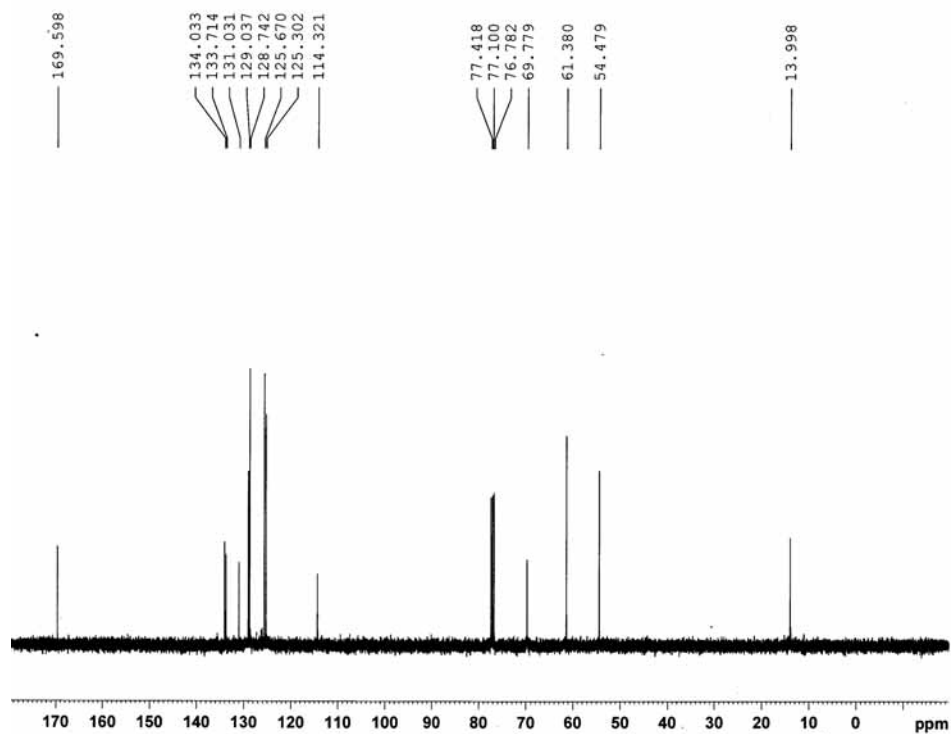

Figure S27b. <sup>13</sup>C NMR spectrum of compound 25

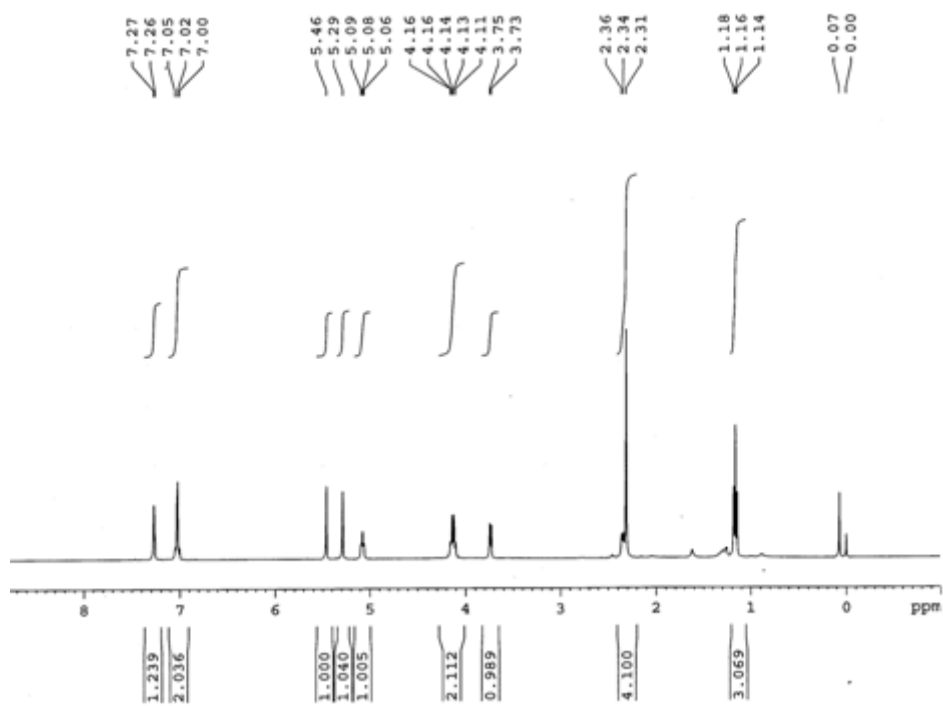

Figure S28a.  $^1\text{H}$  NMR spectrum of compound 26

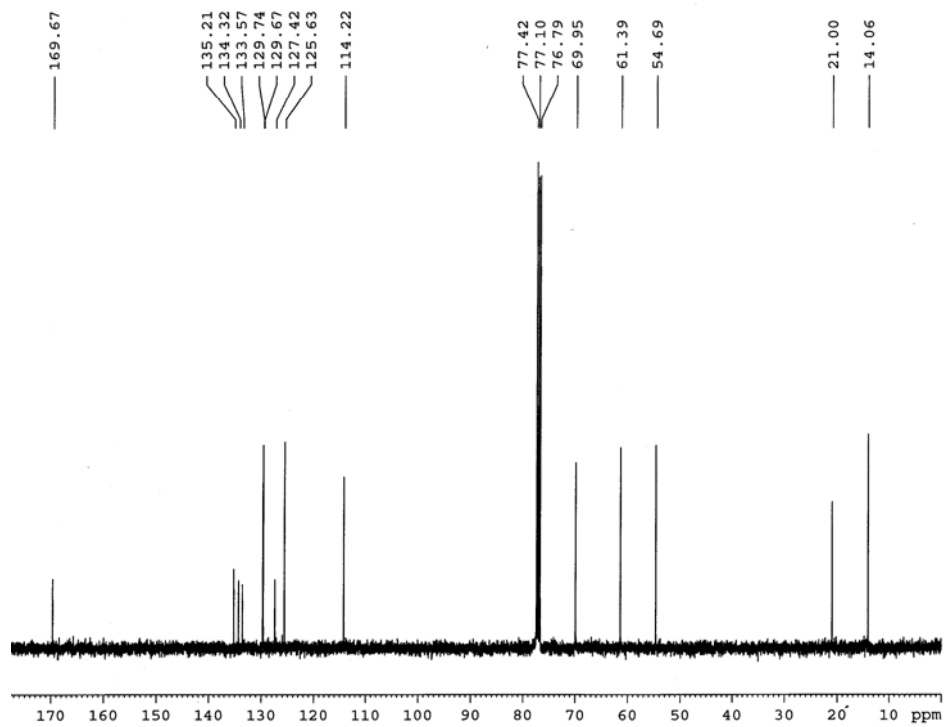

Figure S28b.  $^{13}\text{C}$  NMR spectrum of compound 26

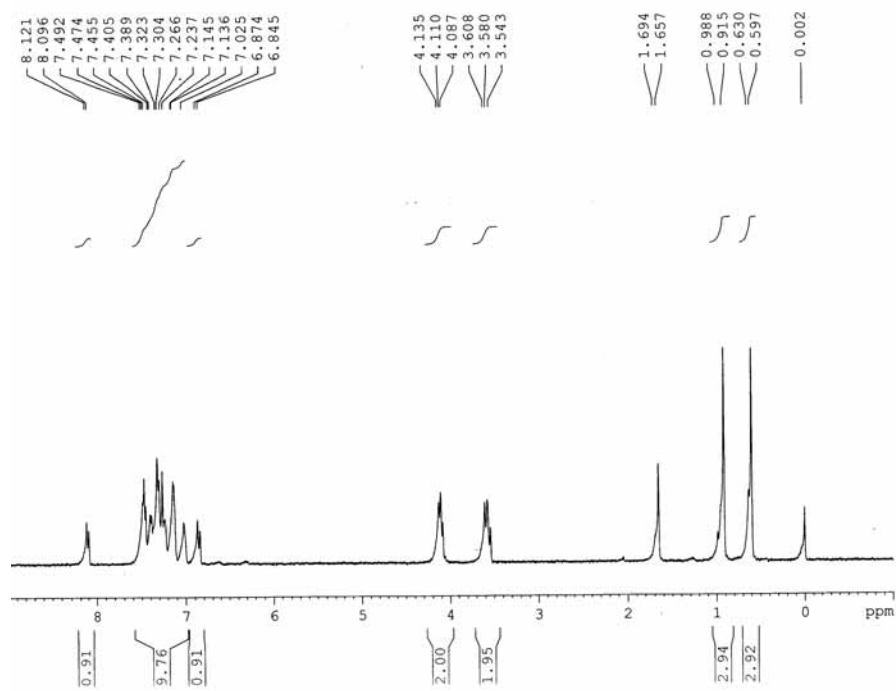

**Figure S29a.** <sup>1</sup>H NMR spectrum of compound 27

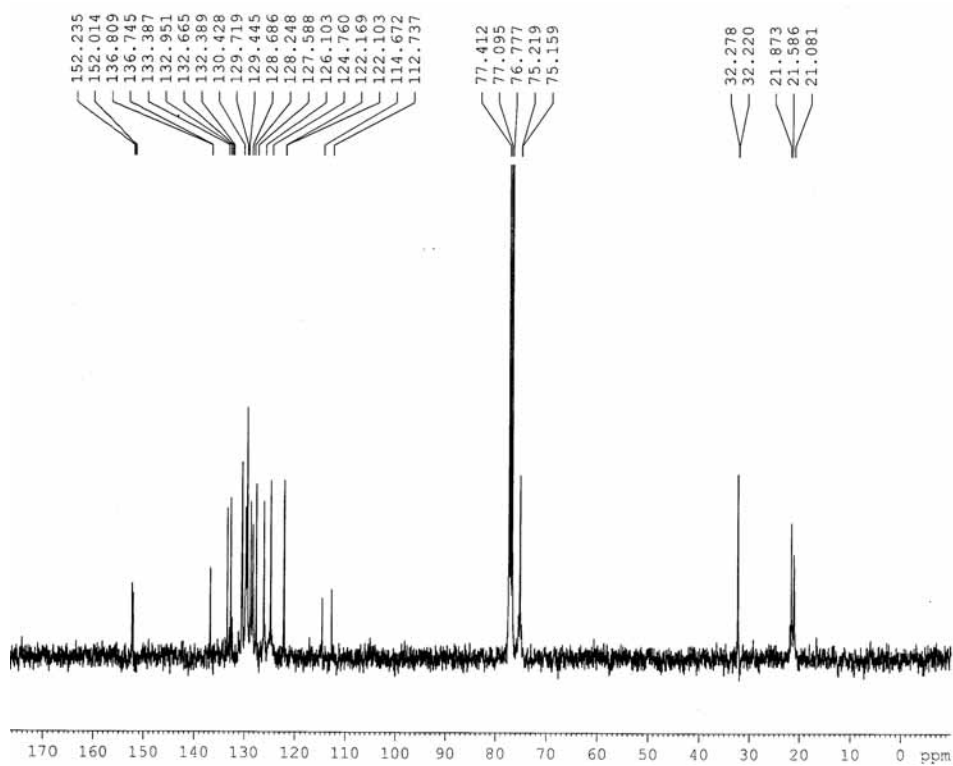

**Figure S29b.** <sup>13</sup>C NMR spectrum of compound 27

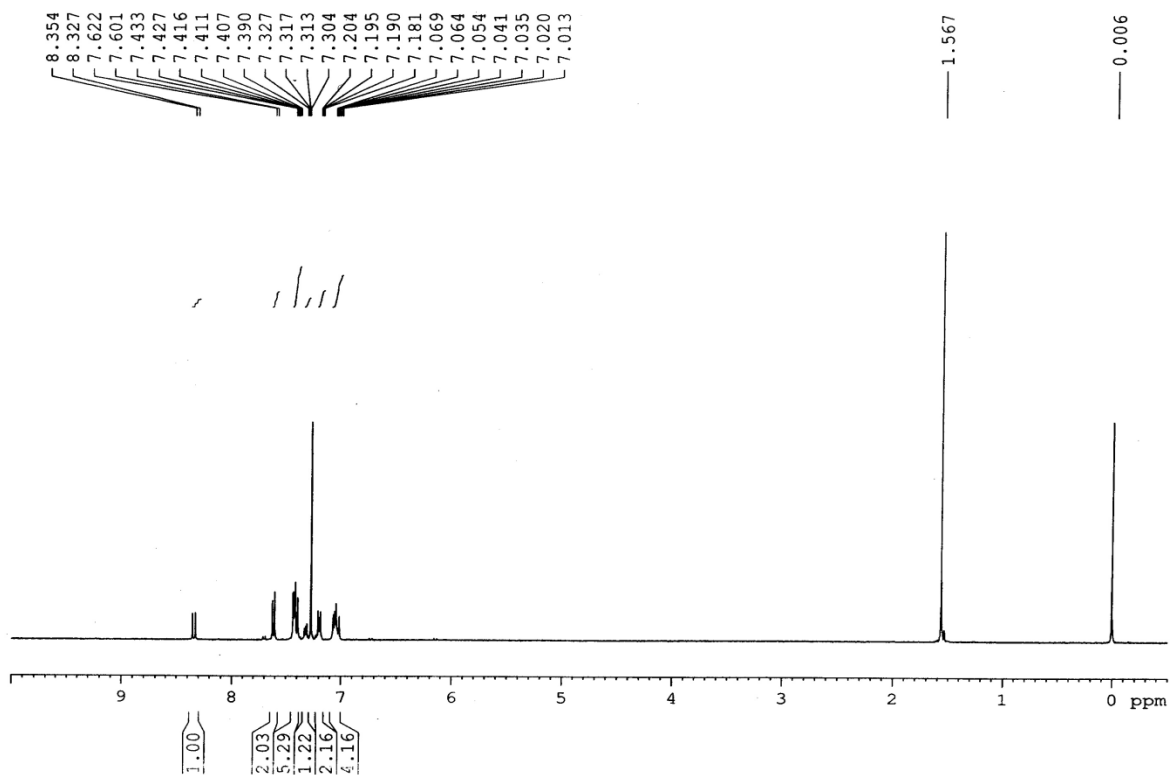

Figure S30a. <sup>1</sup>H NMR spectrum of compound 28

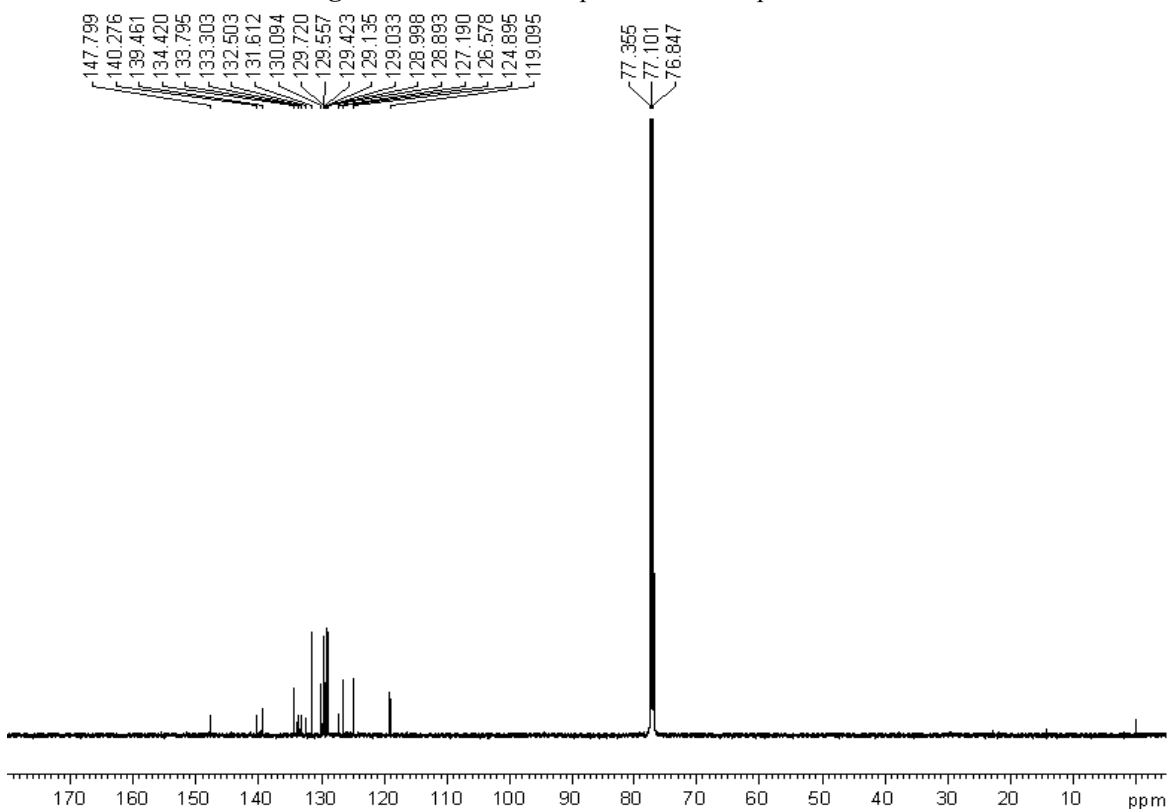

Figure S30b. <sup>13</sup>C NMR spectrum of compound 28

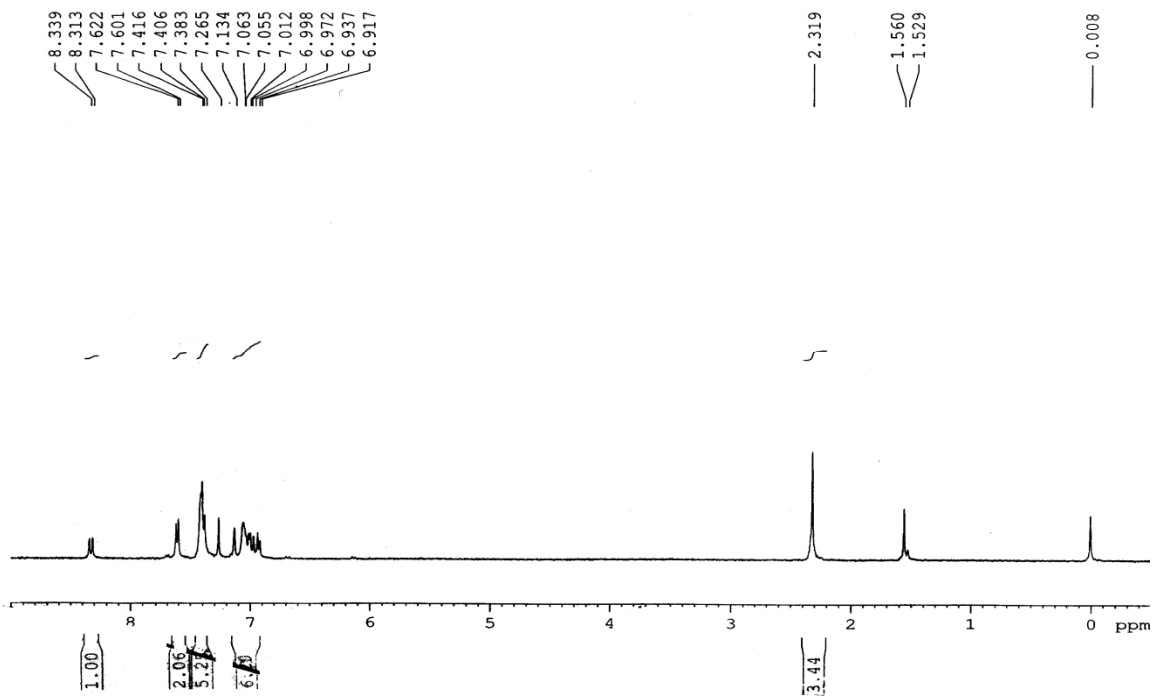

Figure S31a. <sup>1</sup>H NMR spectrum of compound 29

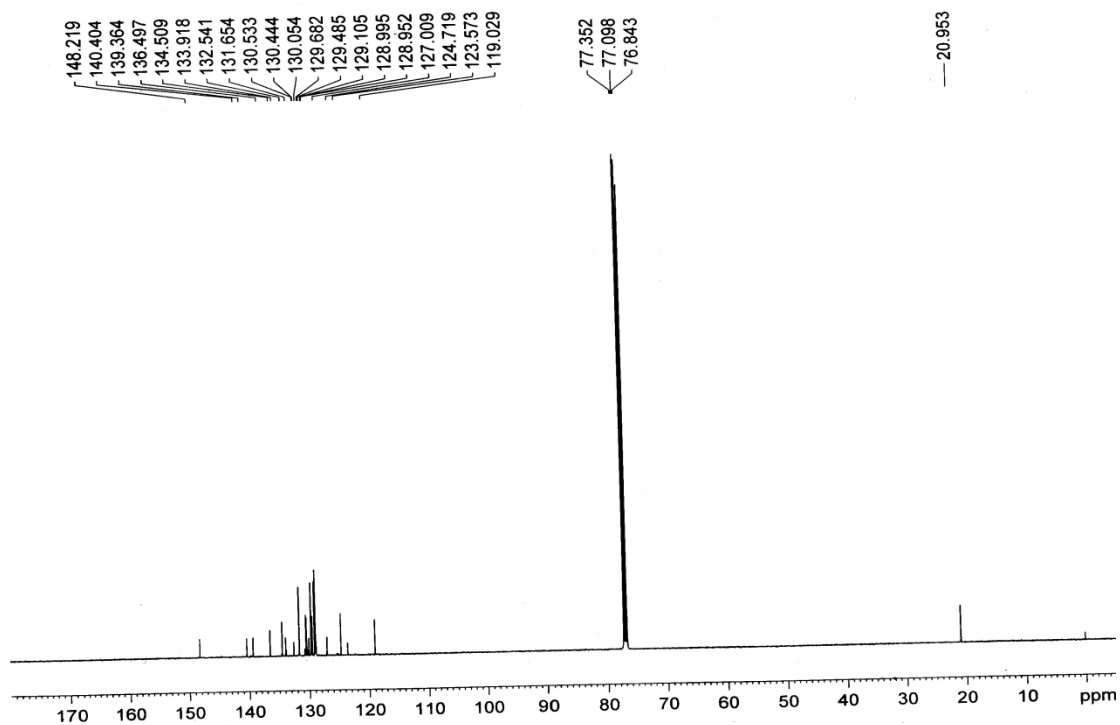

Figure S31b. <sup>13</sup>C NMR spectrum of compound 29



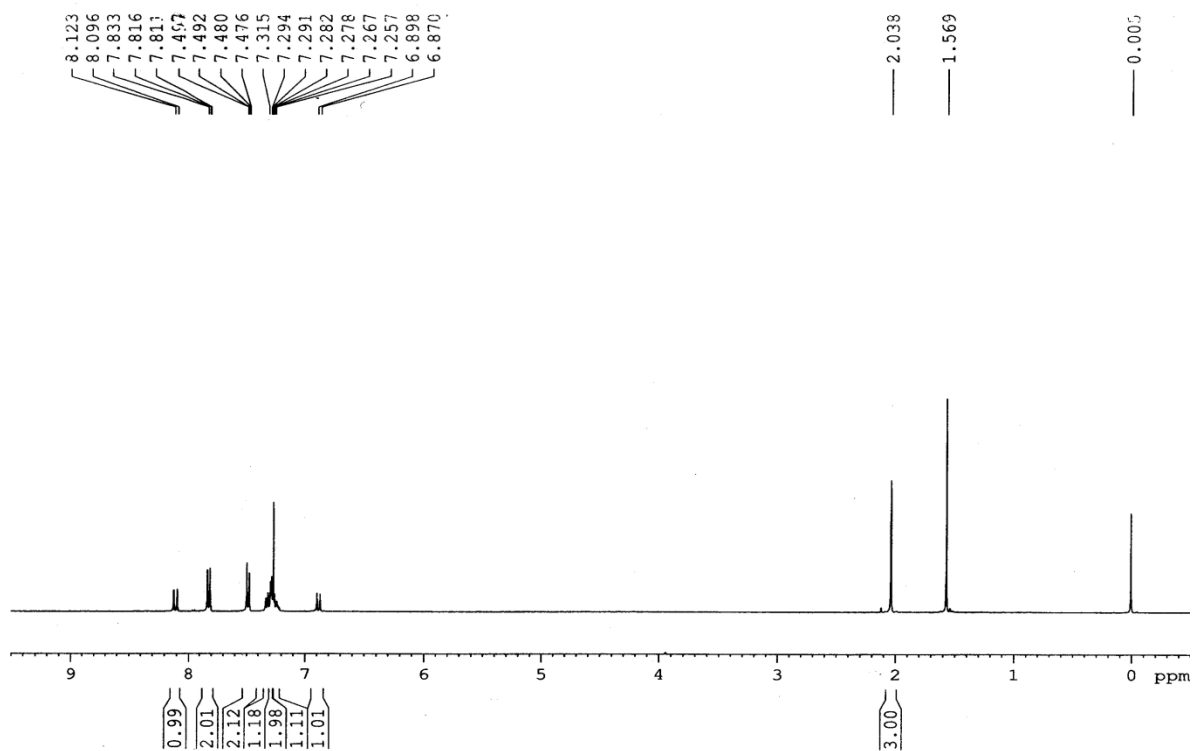

Figure S32a. <sup>1</sup>H NMR spectrum of compound 30

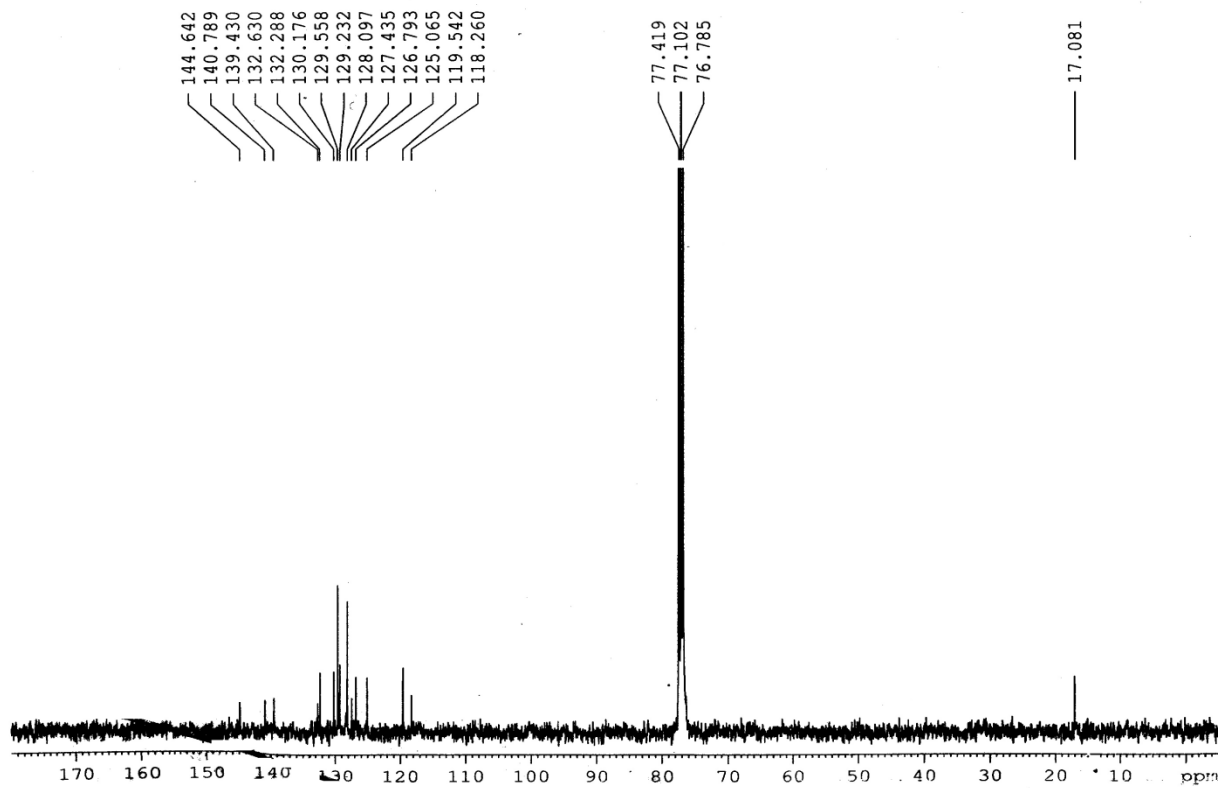

Figure S32b. <sup>13</sup>C NMR spectrum of compound 30

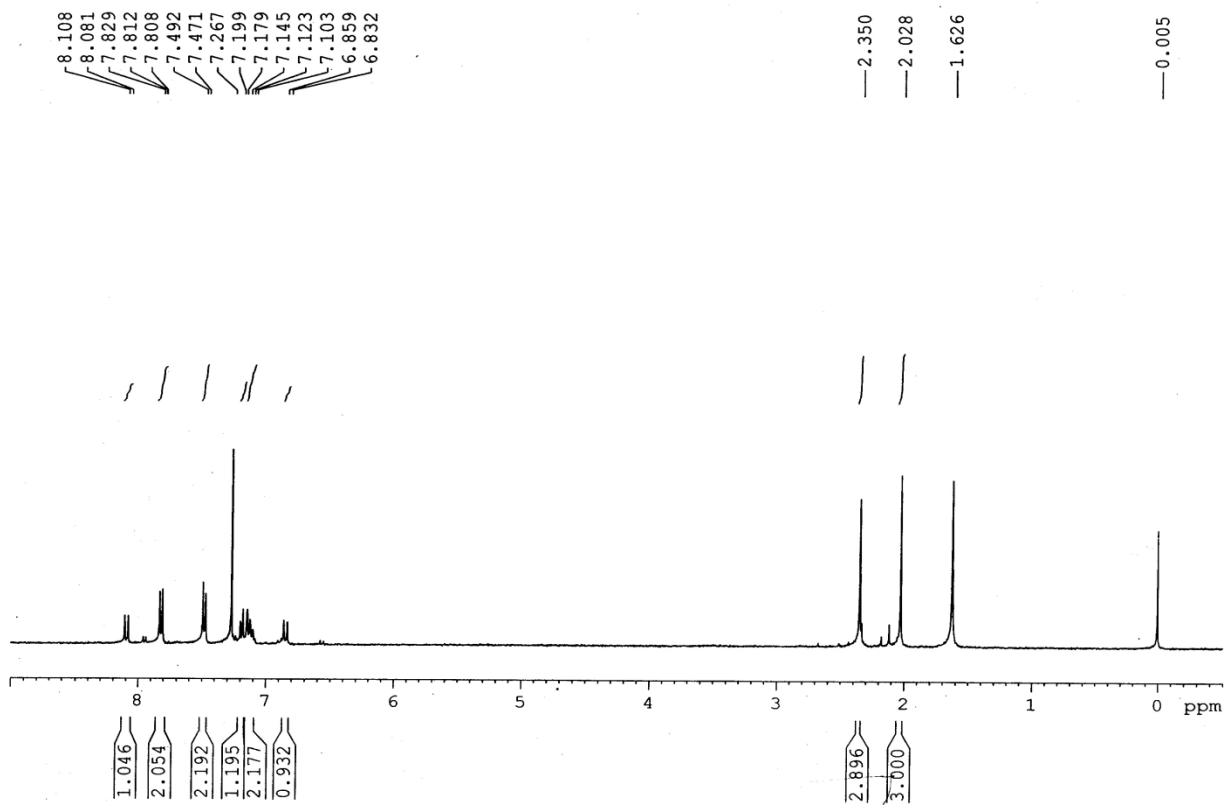

Figure S33a. <sup>1</sup>H NMR spectrum of compound 31

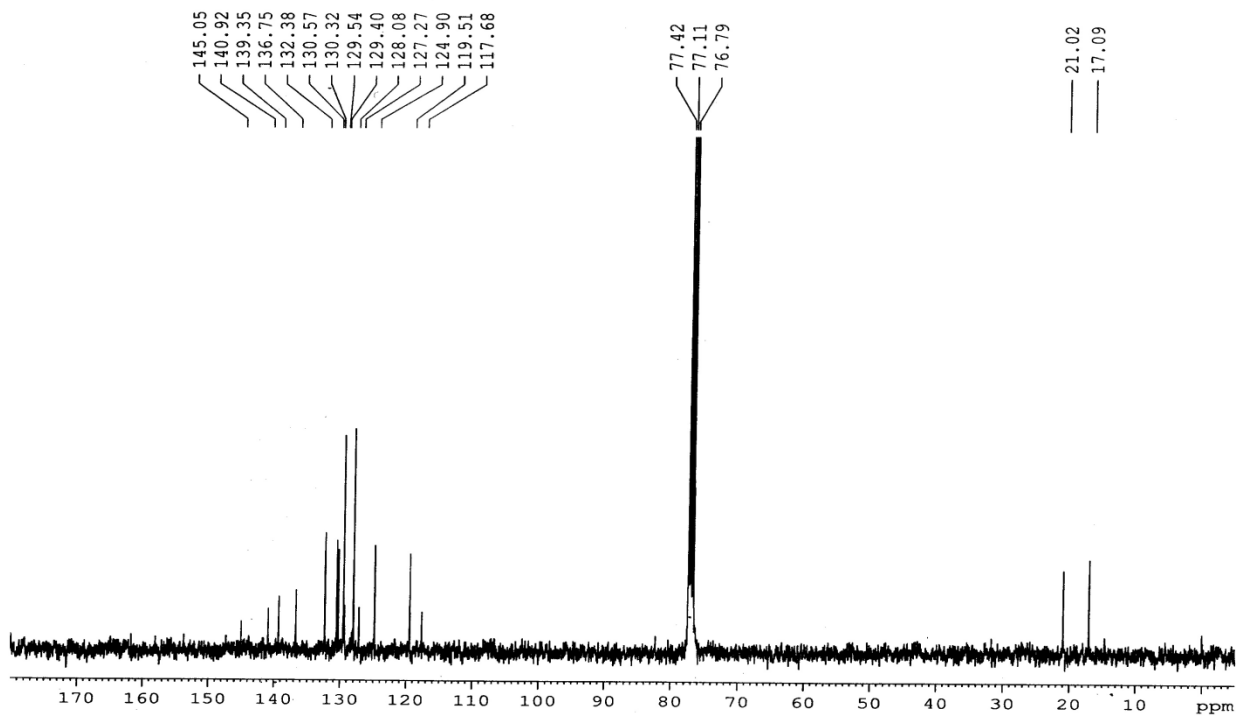

Figure S33b. <sup>13</sup>C NMR spectrum of compound 31

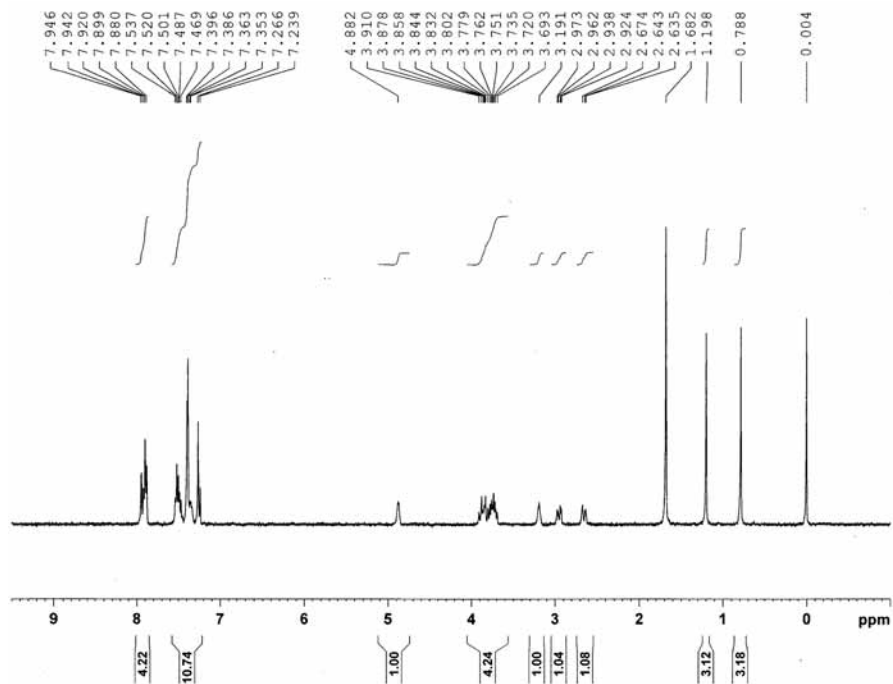

Figure S34a.  $^1\text{H}$  NMR spectrum of compound (*E*)-32

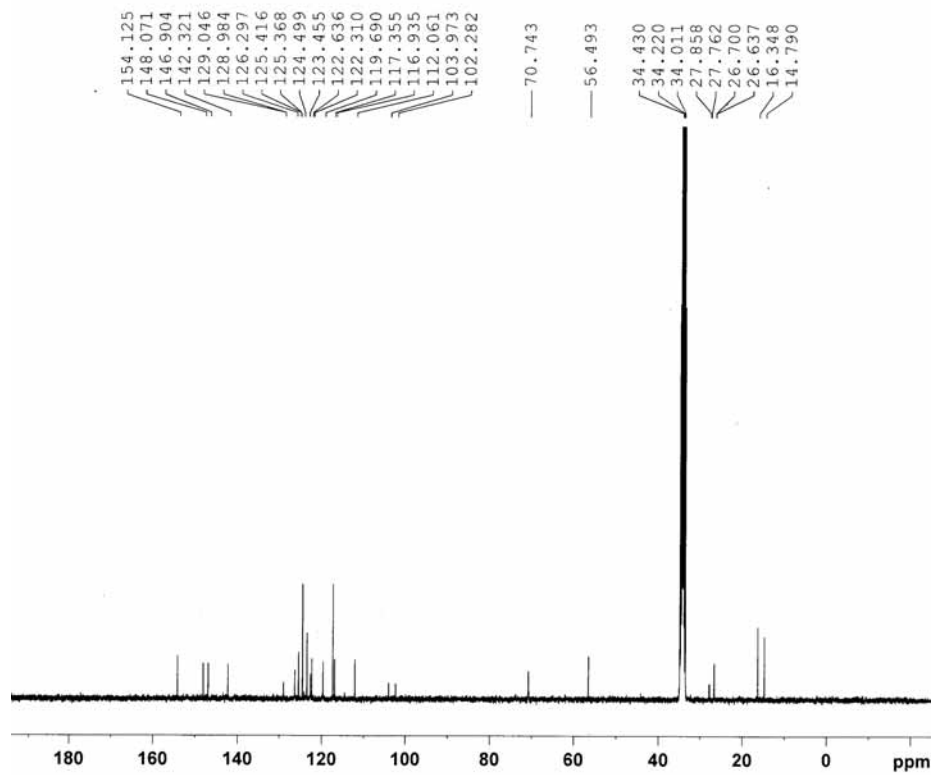

Figure S34b.  $^{13}\text{C}$  NMR spectrum of compound (*E*)-32

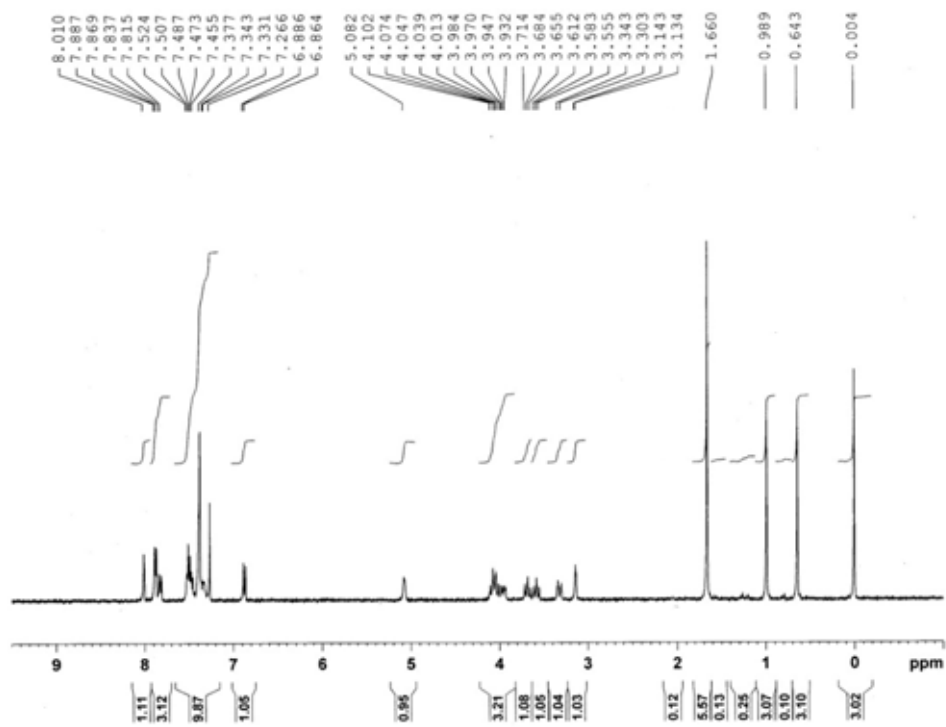

Figure S35a.  $^1\text{H}$  NMR spectrum of compound (Z)-32

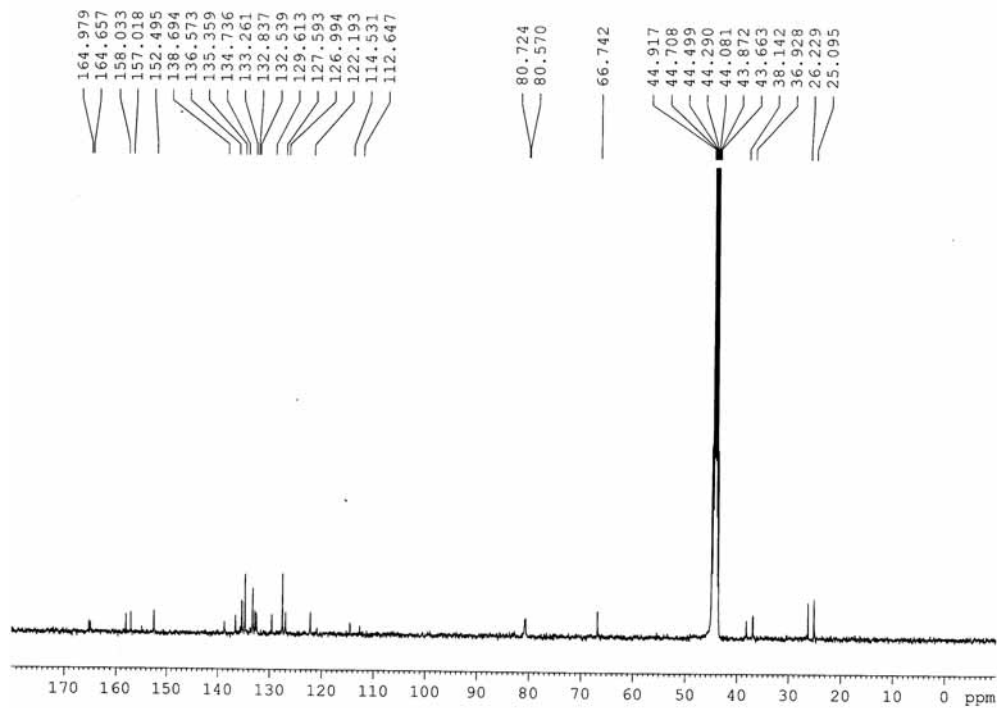

Figure S35b.  $^{13}\text{C}$  NMR spectrum of compound (Z)-32

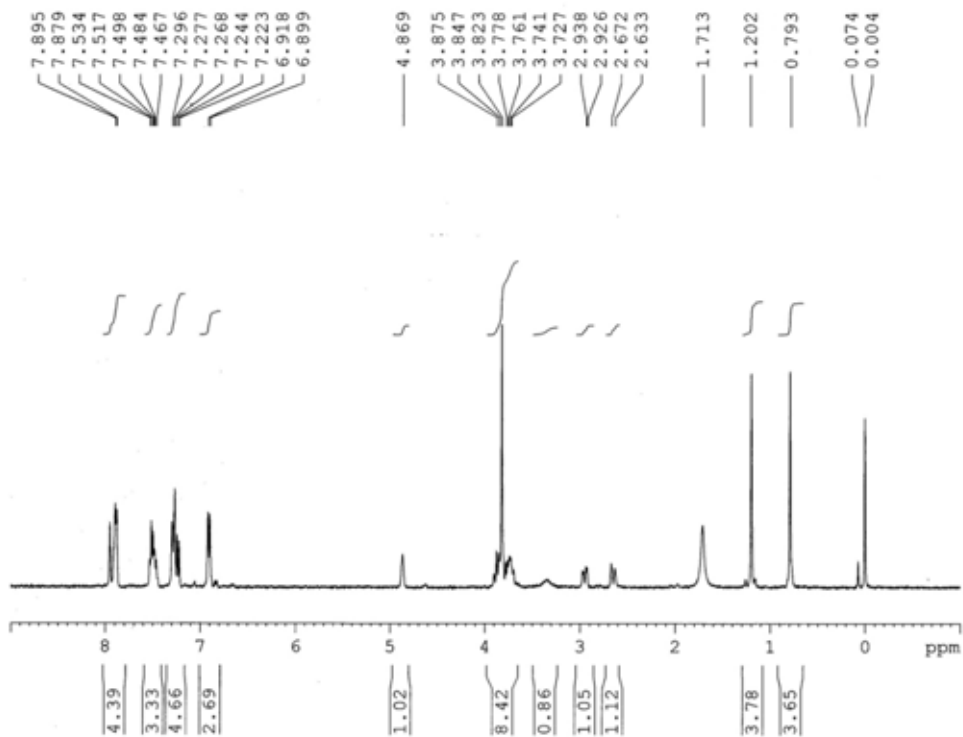

Figure S36a.  $^1\text{H}$  NMR spectrum of compound (*E*)-33

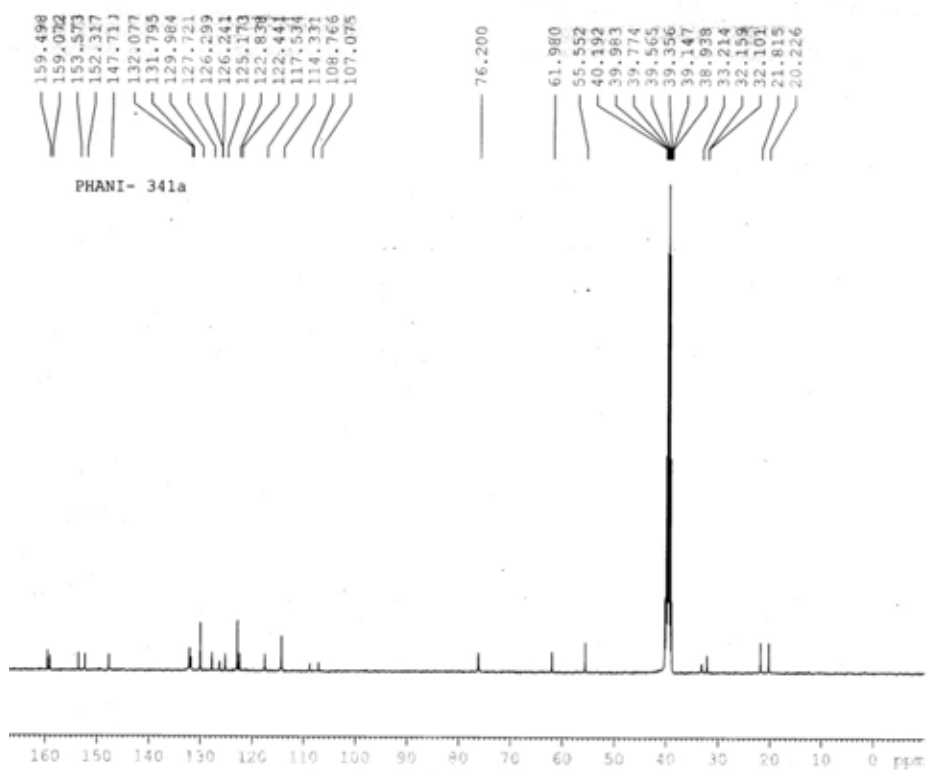

Figure S36b.  $^{13}\text{C}$  NMR spectrum of compound (*E*)-33

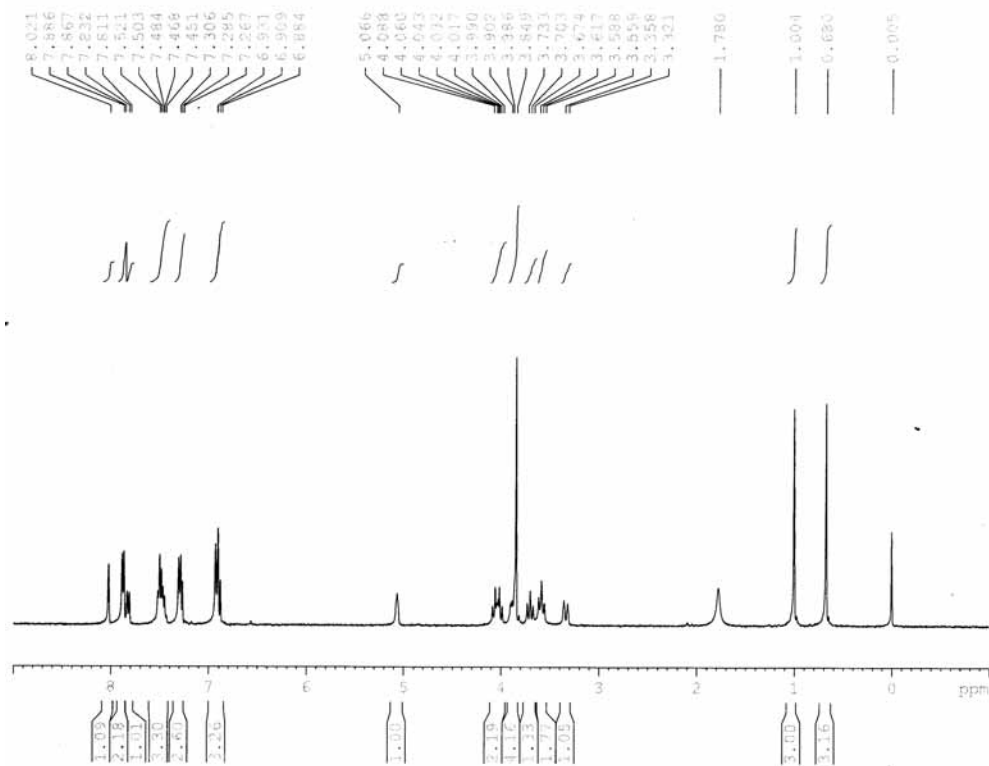

Figure S37a. <sup>1</sup>H NMR spectrum of compound (Z)-33

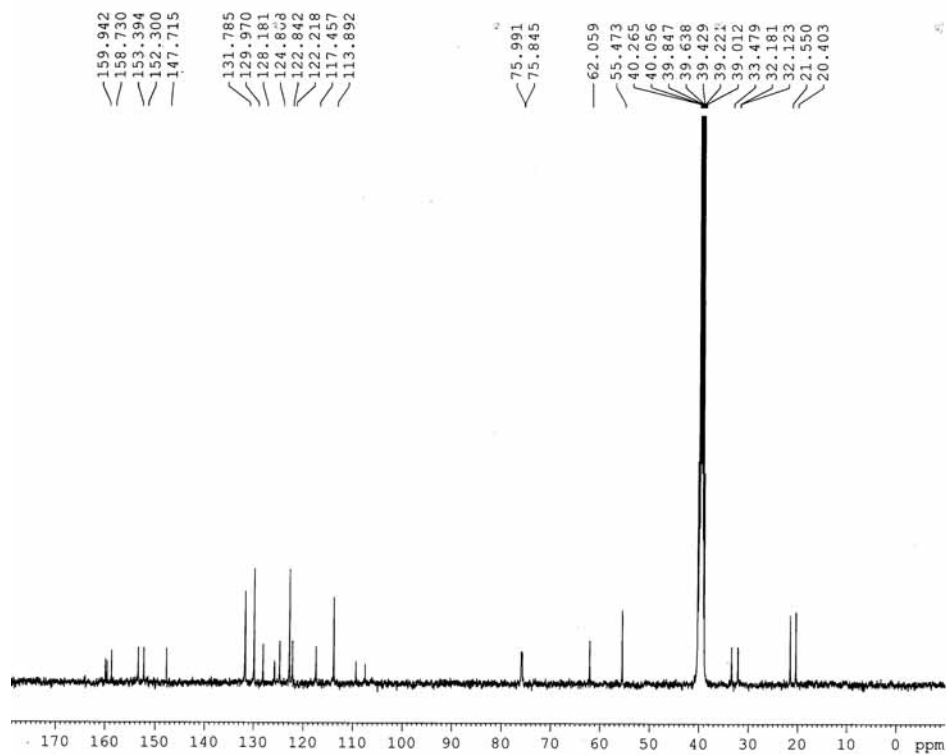

Figure S37b. <sup>13</sup>C NMR spectrum of compound (Z)-33

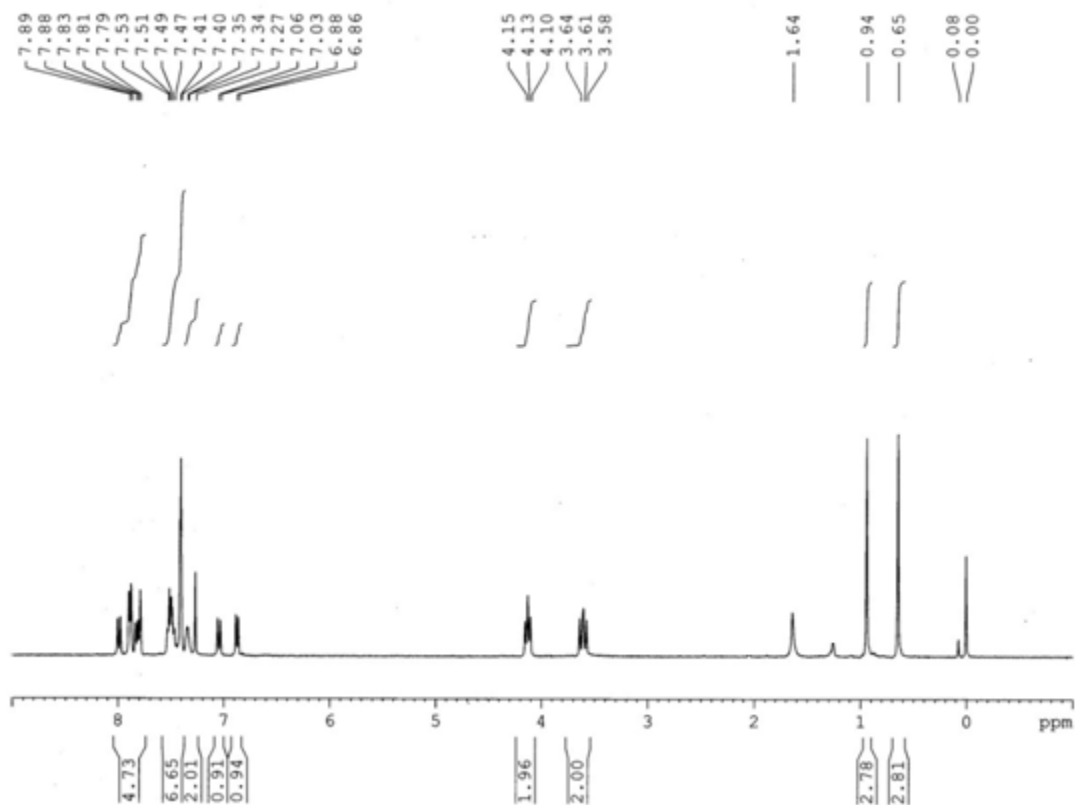

Figure S38a. <sup>1</sup>H NMR spectrum of compound (E)-34

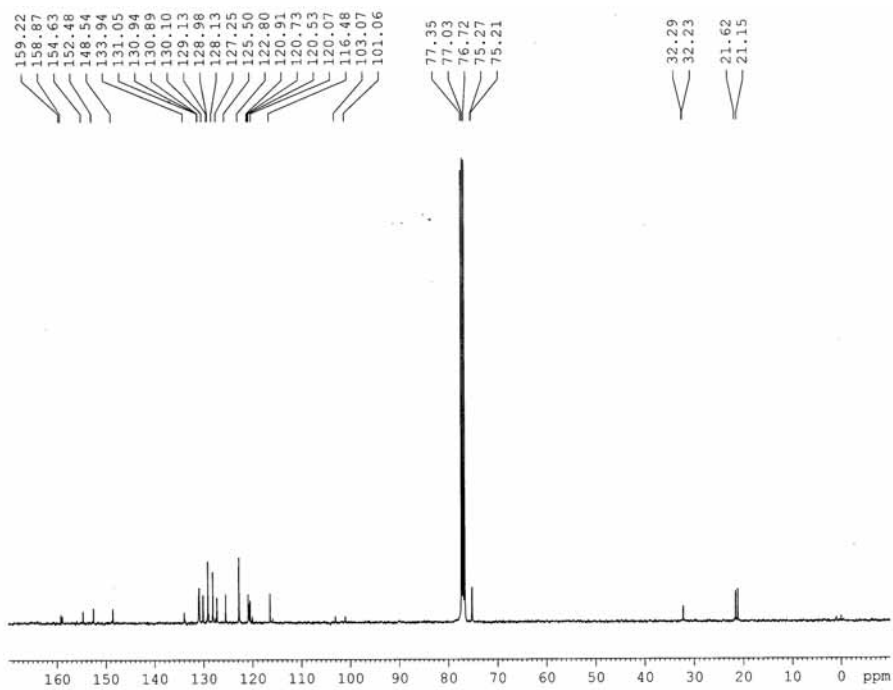

Figure S38b. <sup>13</sup>C NMR spectrum of compound (E)-34

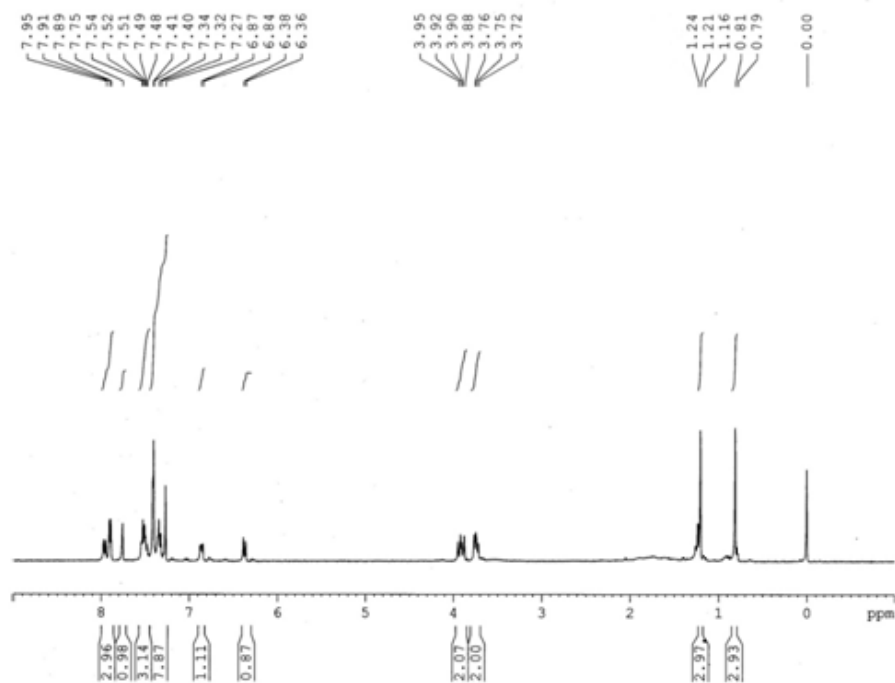

Figure S39a.  $^1\text{H}$  NMR spectrum of compound (Z)-34

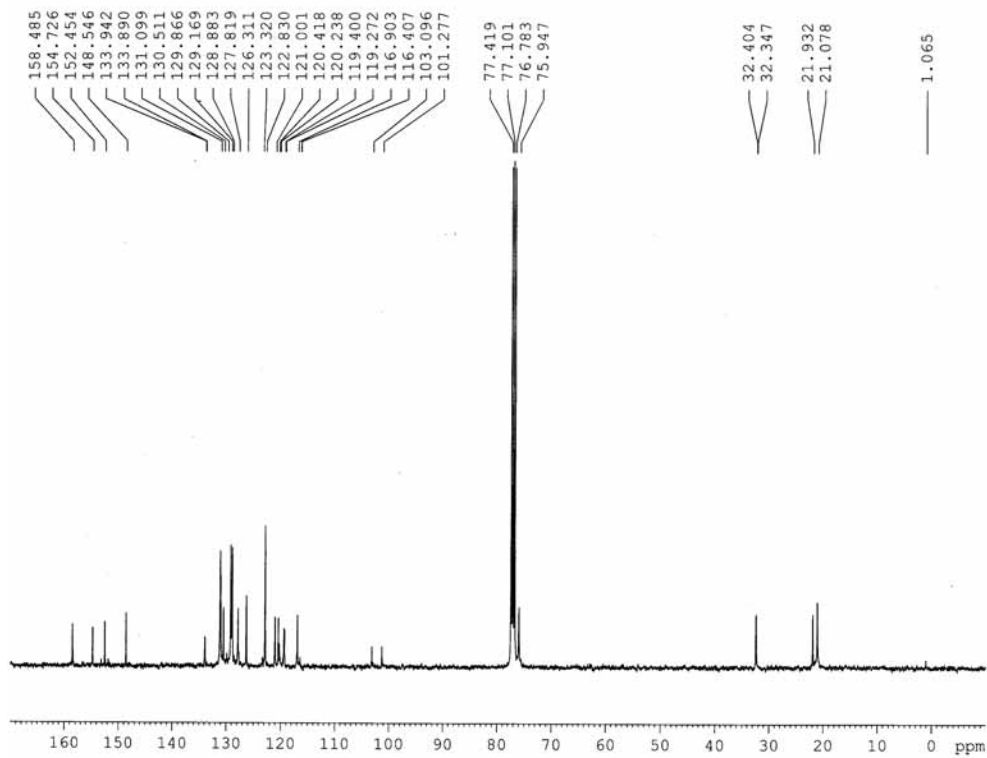

Figure S39b.  $^{13}\text{C}$  NMR spectrum of compound (Z)-34



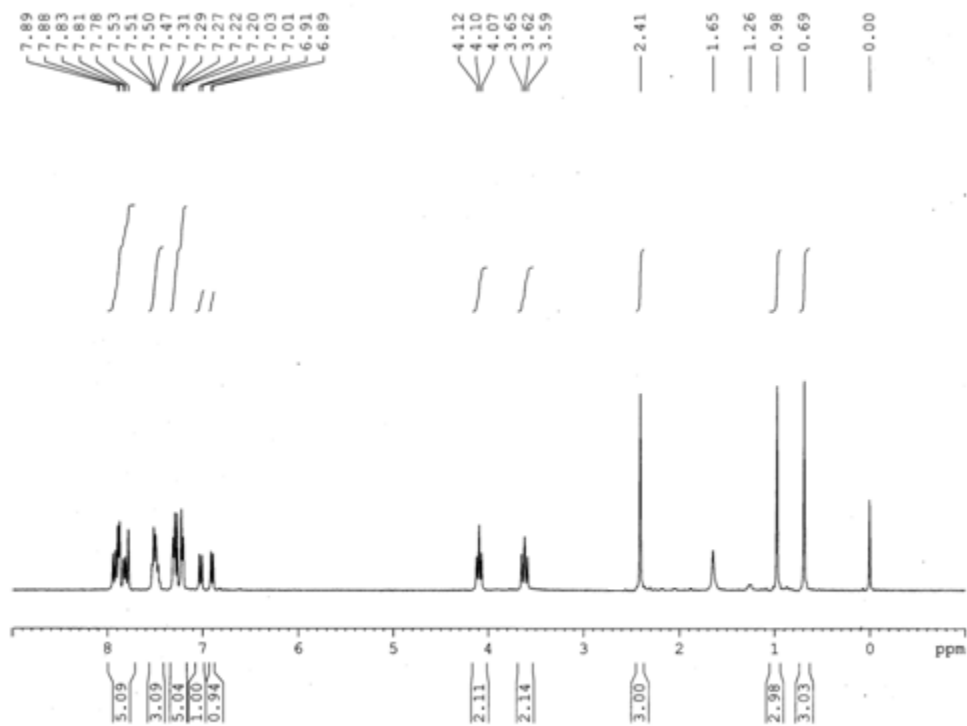

Figure S40a. <sup>1</sup>H NMR spectrum of compound (E)-35

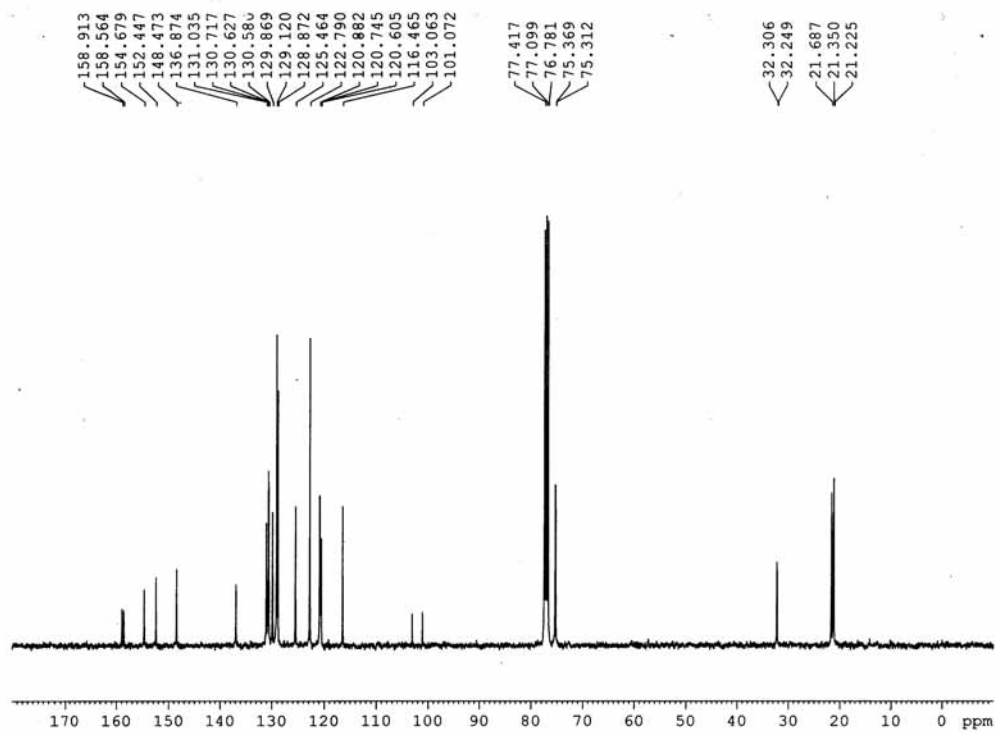

Figure S40b. <sup>13</sup>C NMR spectrum of compound (E)-35

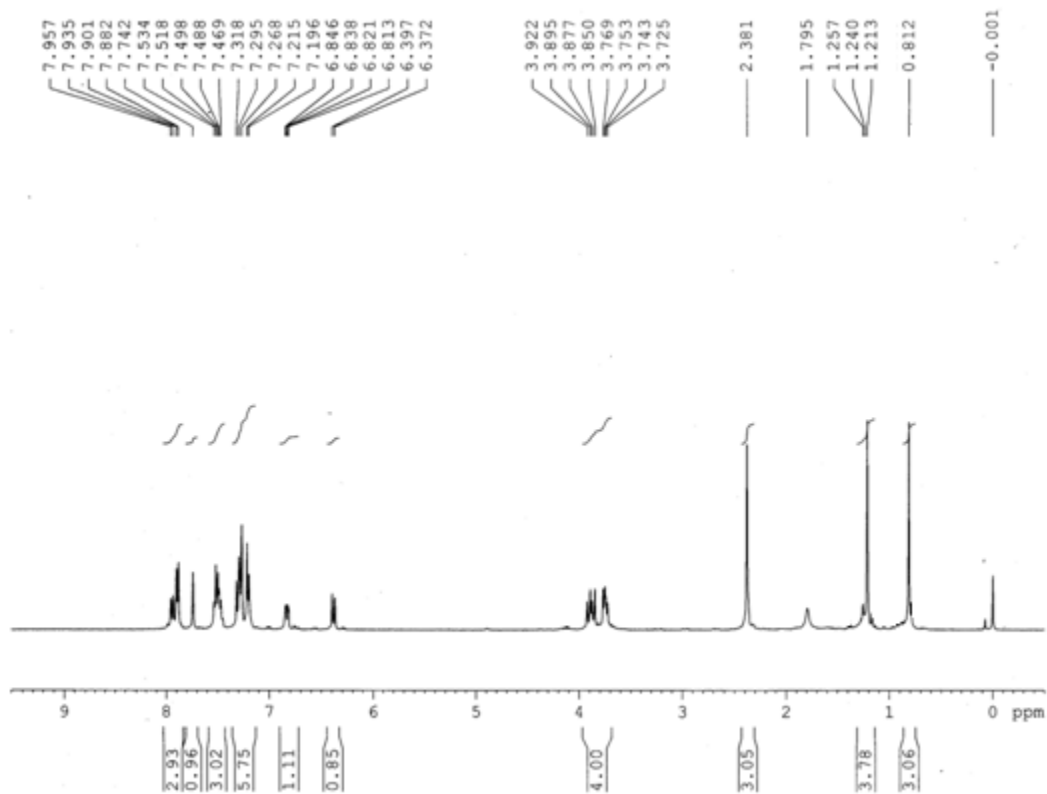

Figure S41a.  $^1\text{H}$  NMR spectrum of compound (Z)-35

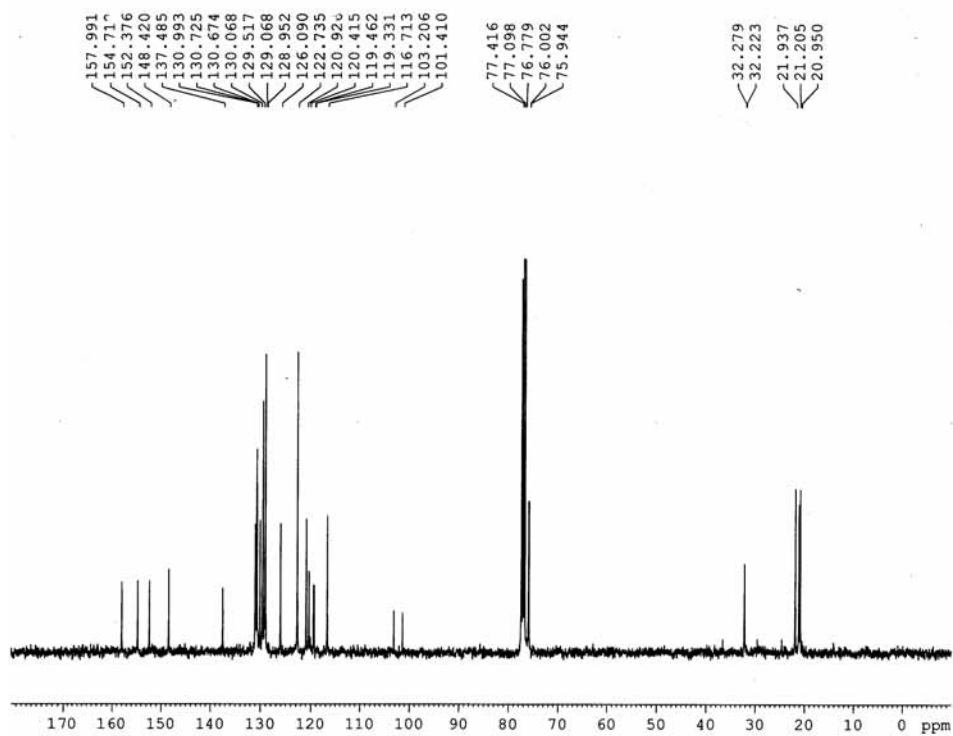

Figure S41b.  $^{13}\text{C}$  NMR spectrum of compound (Z)-35

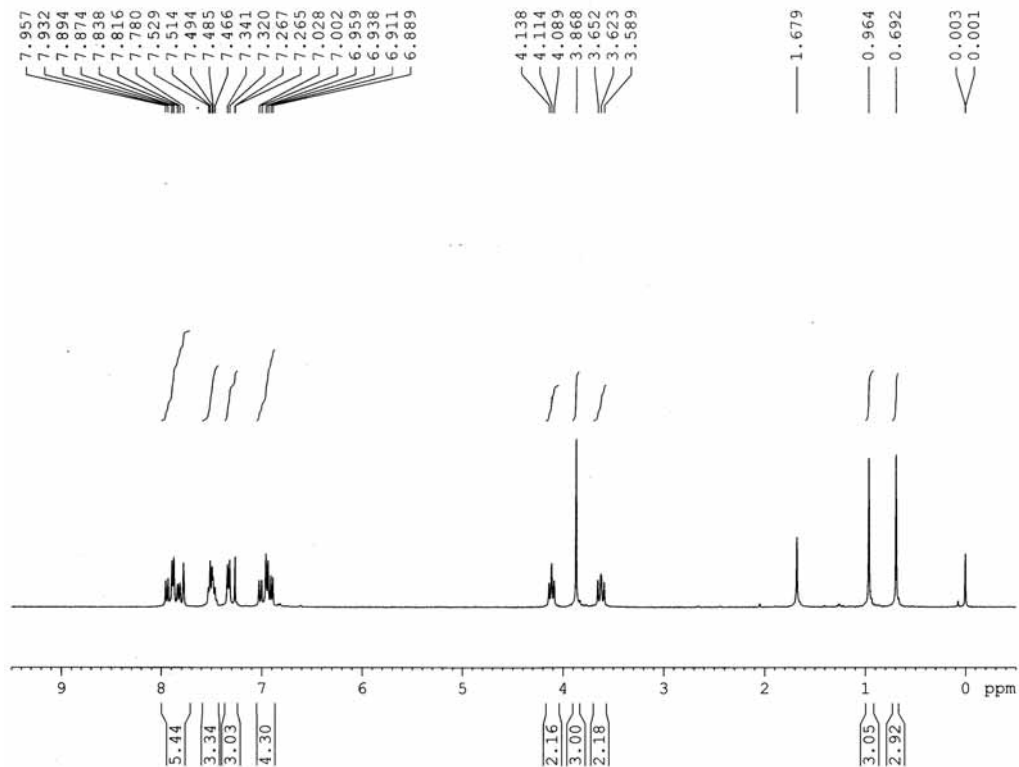

Figure S42a. <sup>1</sup>H NMR spectrum of compound (E)-36

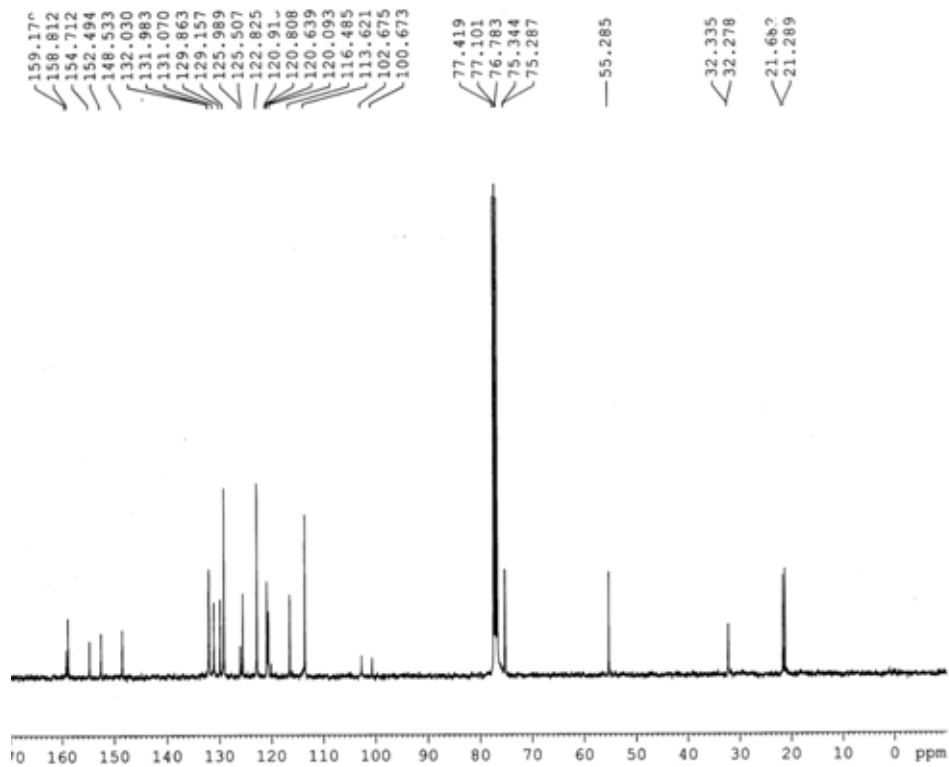

Figure S42b. <sup>13</sup>C NMR spectrum of compound (E)-36

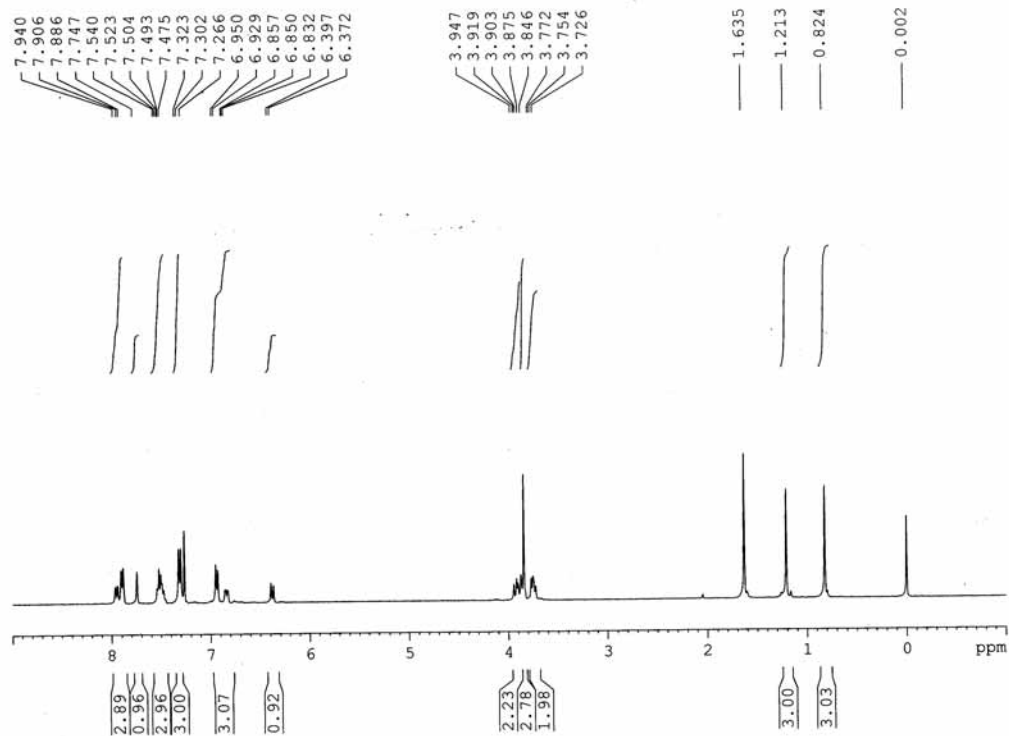

Figure S43a. <sup>1</sup>H NMR spectrum of compound (Z)-36

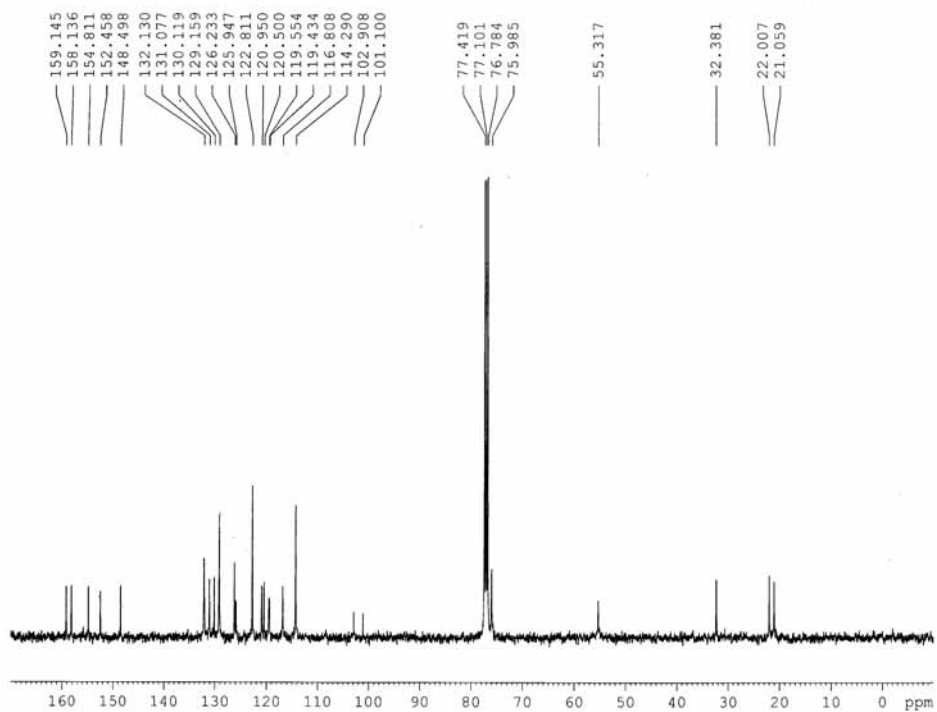

Figure S43b. <sup>13</sup>C NMR spectrum of compound (Z)-36

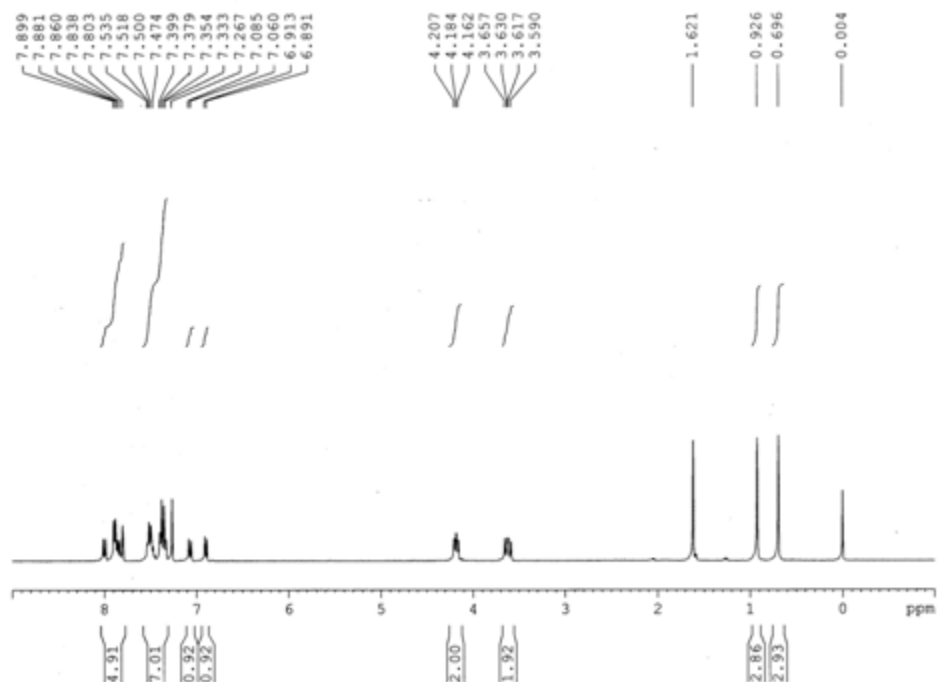

Figure S44a. <sup>1</sup>H NMR spectrum of compound (E)-37

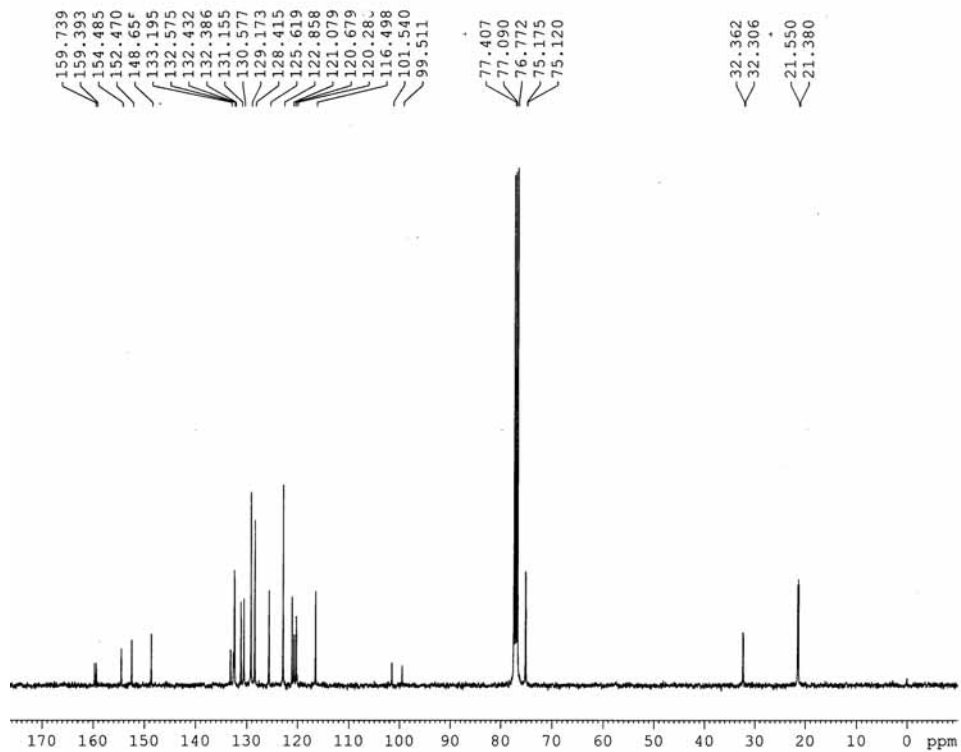

Figure S44b. <sup>13</sup>C NMR spectrum of compound (E)-37

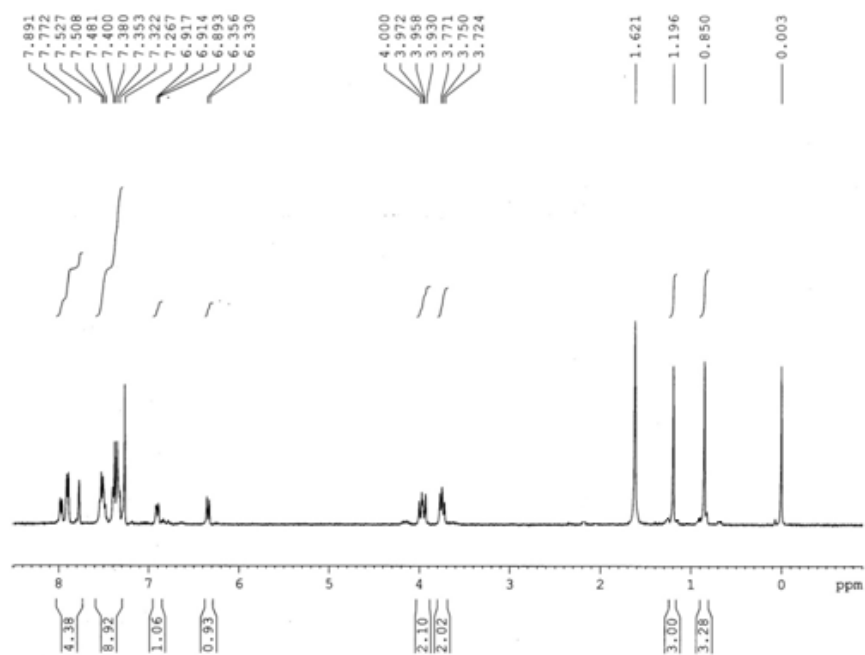

Figure S45a.  $^1\text{H}$  NMR spectrum of compound (Z)-37

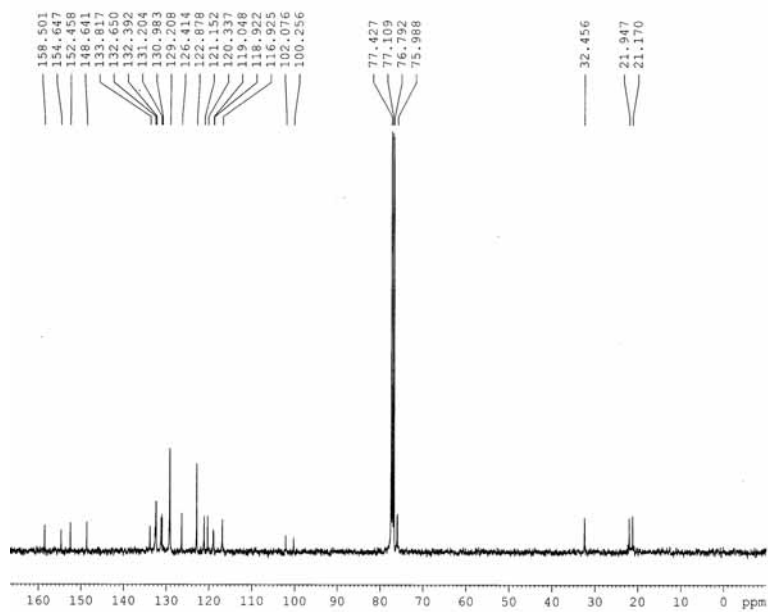

Figure S45b.  $^{13}\text{C}$  NMR spectrum of compound (Z)-37

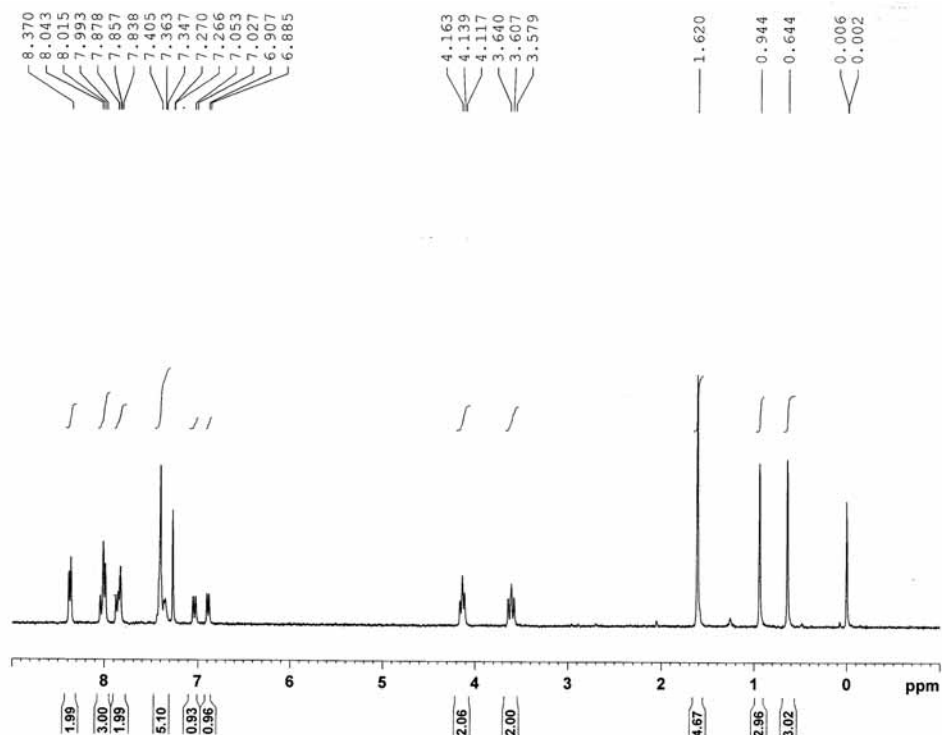

Figure S46a. <sup>1</sup>H NMR spectrum of compound (E)-38

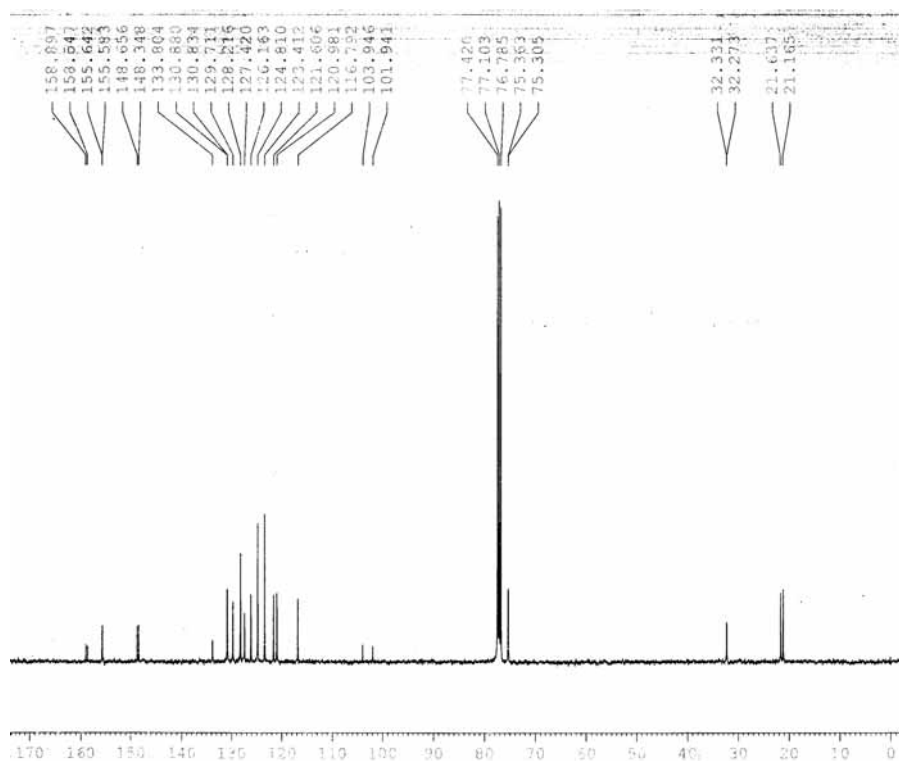

Figure S46b. <sup>13</sup>C NMR spectrum of compound (E)-38

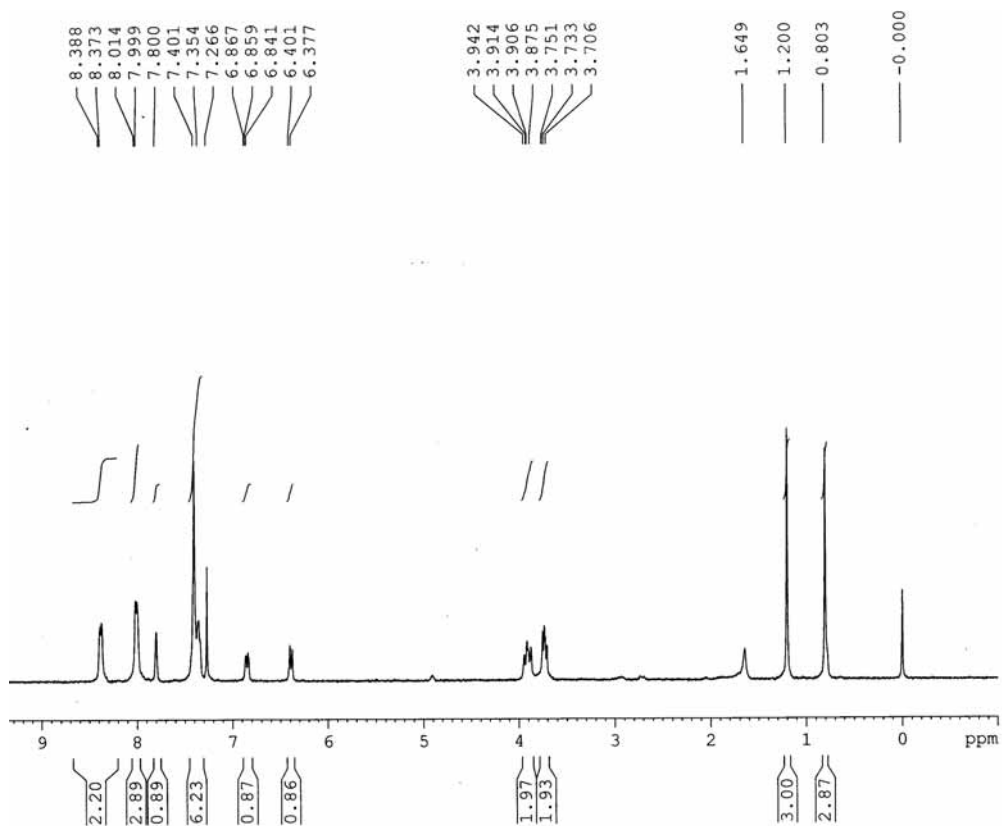

Figure S47a.  $^1\text{H}$  NMR spectrum of compound (Z)-38

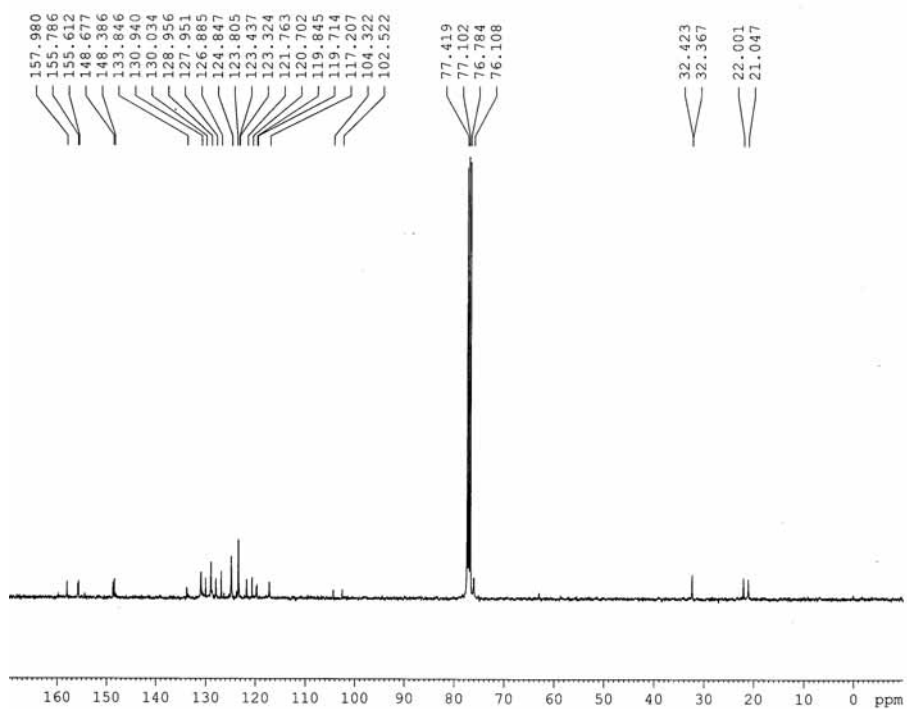

Figure S47b.  $^{13}\text{C}$  NMR spectrum of compound (Z)-38



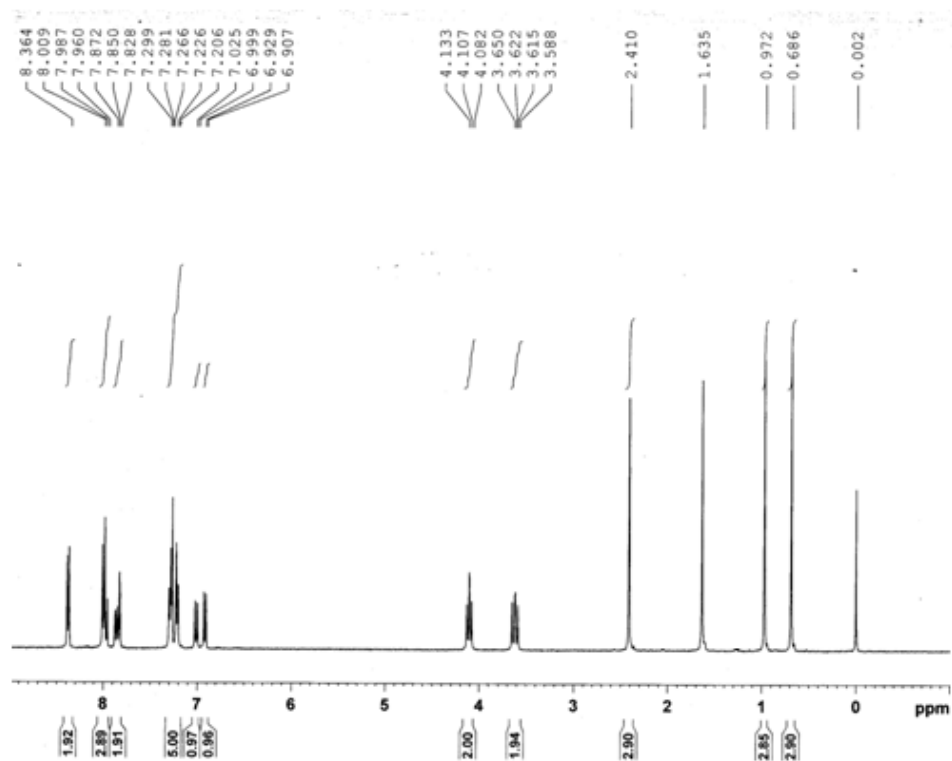

Figure S48a.  $^1\text{H}$  NMR spectrum of compound (*E*)-39

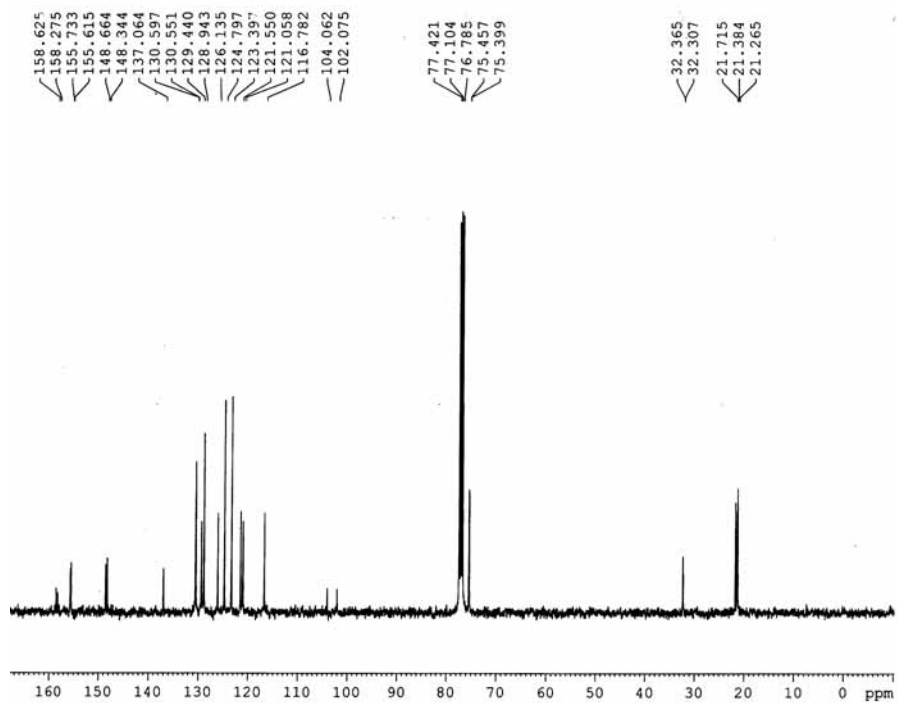

Figure S48b.  $^{13}\text{C}$  NMR spectrum of compound (*E*)-39

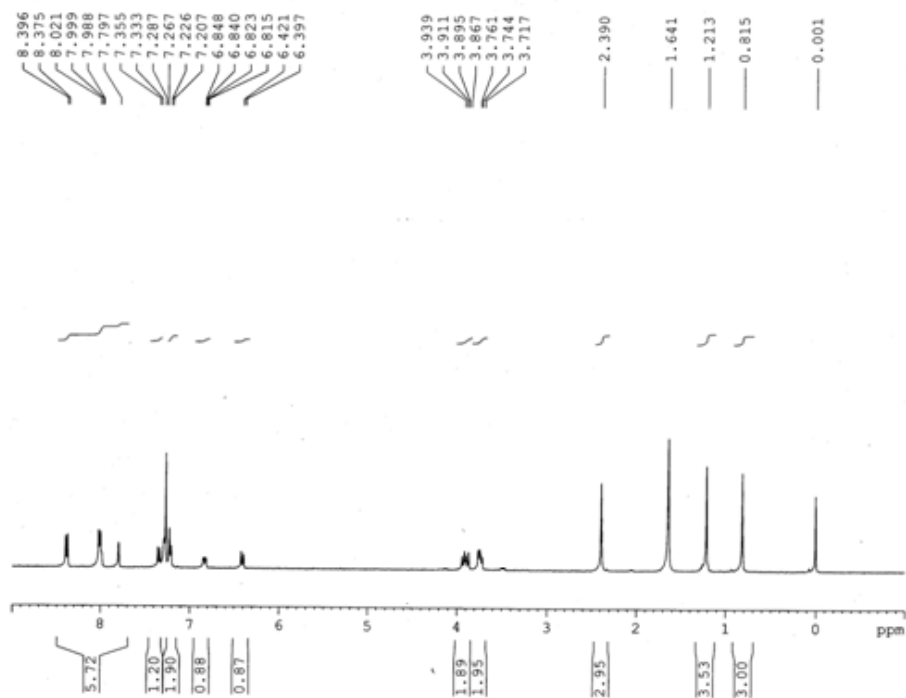

Figure S49a.  $^1\text{H}$  NMR spectrum of compound (Z)-39

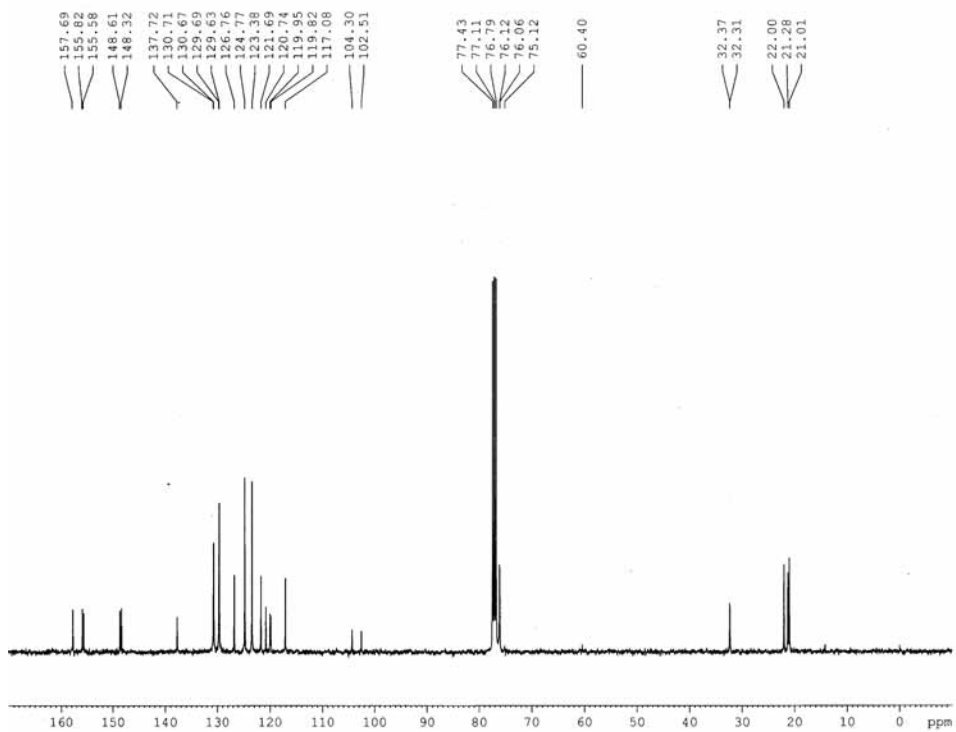

Figure S49b.  $^{13}\text{C}$  NMR spectrum of compound (Z)-39

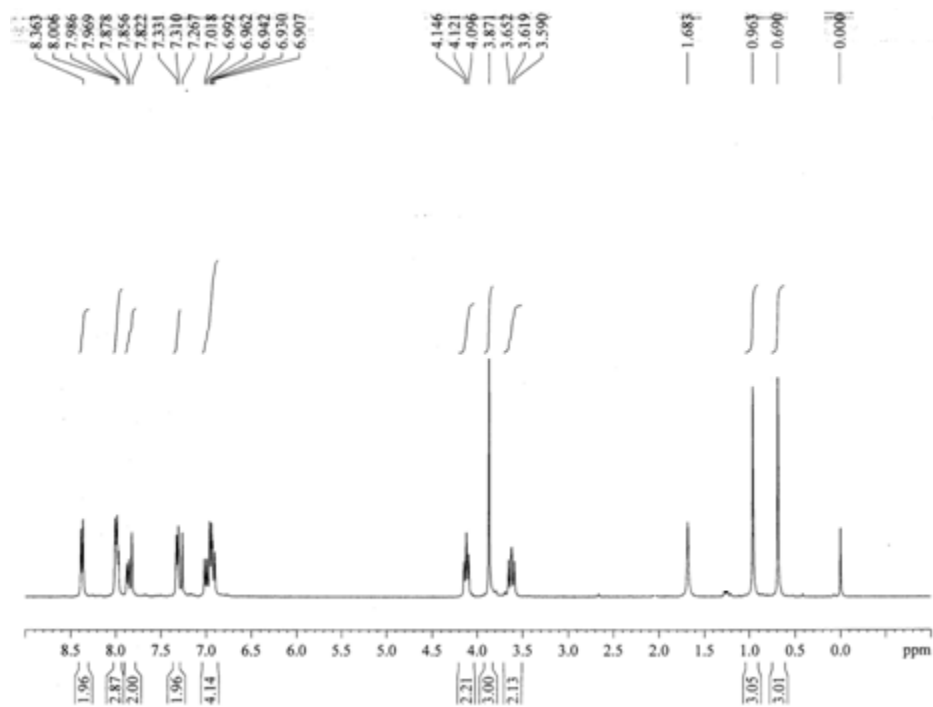

Figure S50a. <sup>1</sup>H NMR spectrum of compound (E)-40

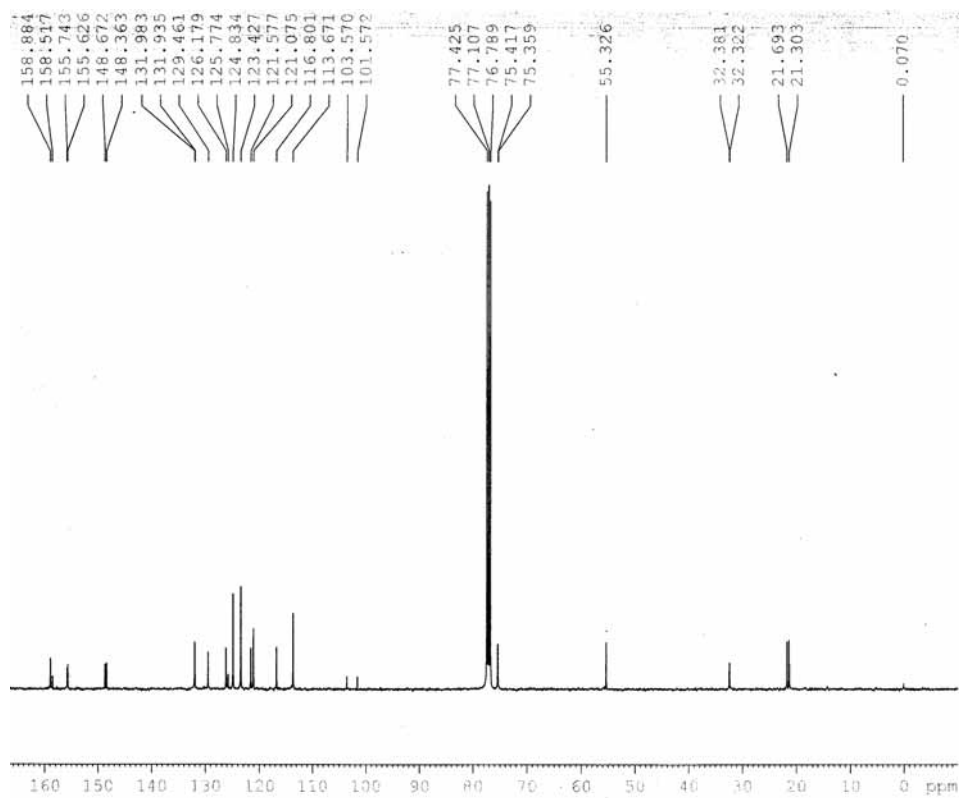

Figure S50b. <sup>13</sup>C NMR spectrum of compound (E)-40

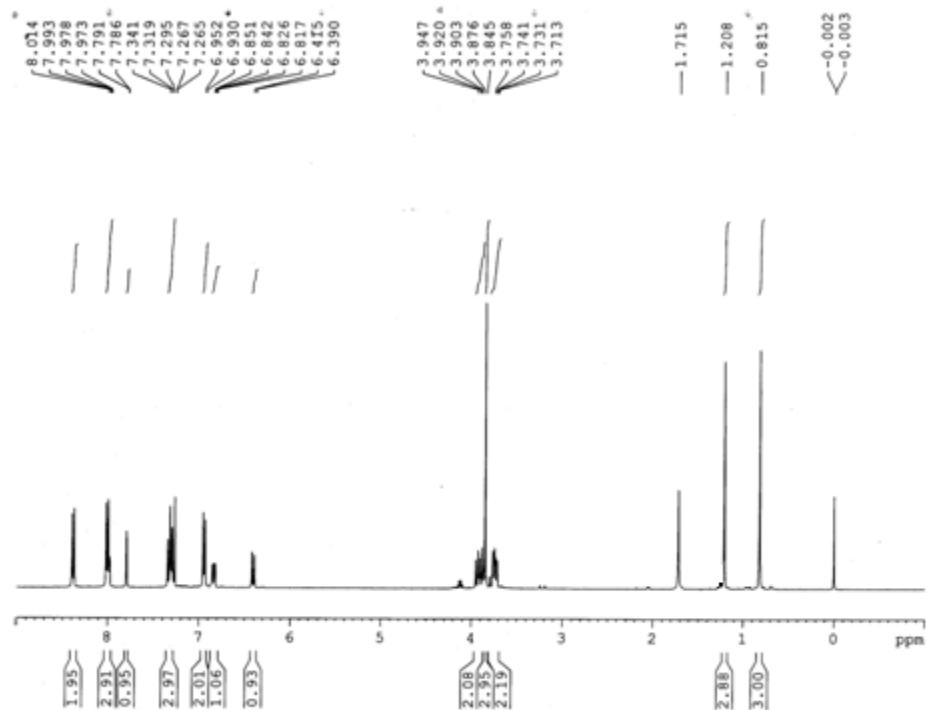

Figure S51a. <sup>1</sup>H NMR spectrum of compound (Z)-40

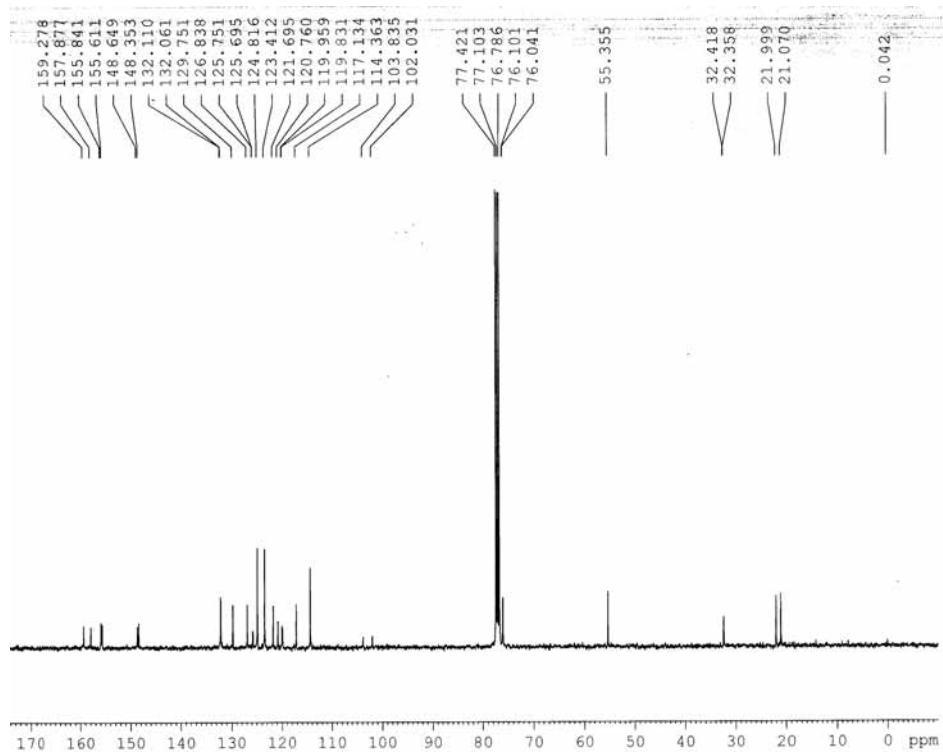

Figure S51b. <sup>13</sup>C NMR spectrum of compound (Z)-40

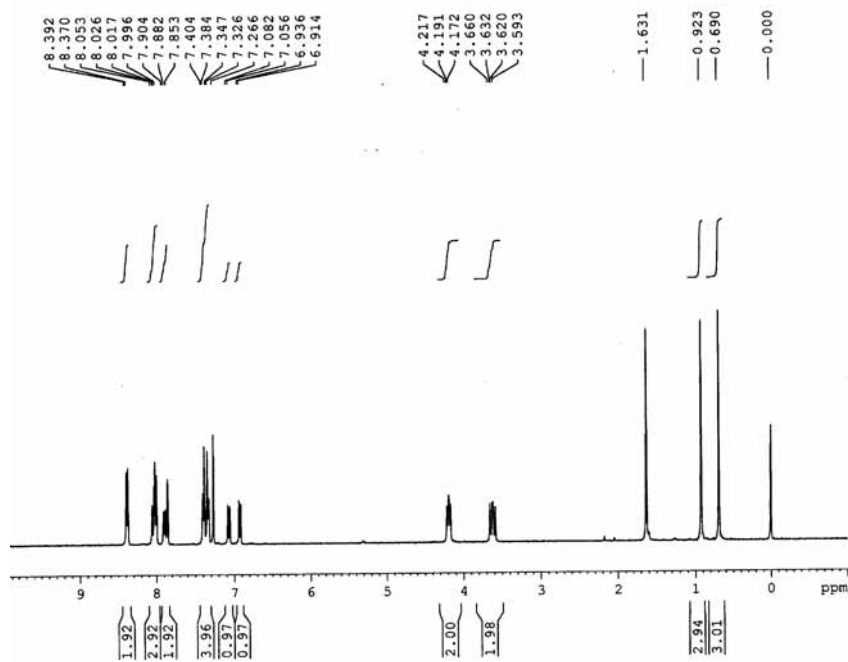

Figure S52a.  $^1\text{H}$  NMR spectrum of compound (*E*)-41

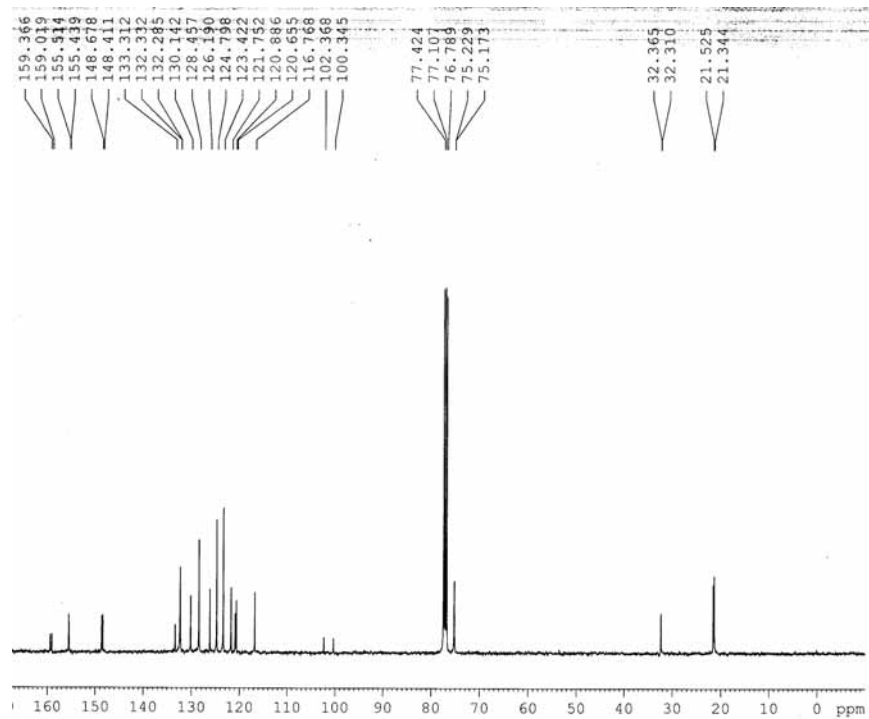

Figure S52b.  $^{13}\text{C}$  NMR spectrum of compound (*E*)-41

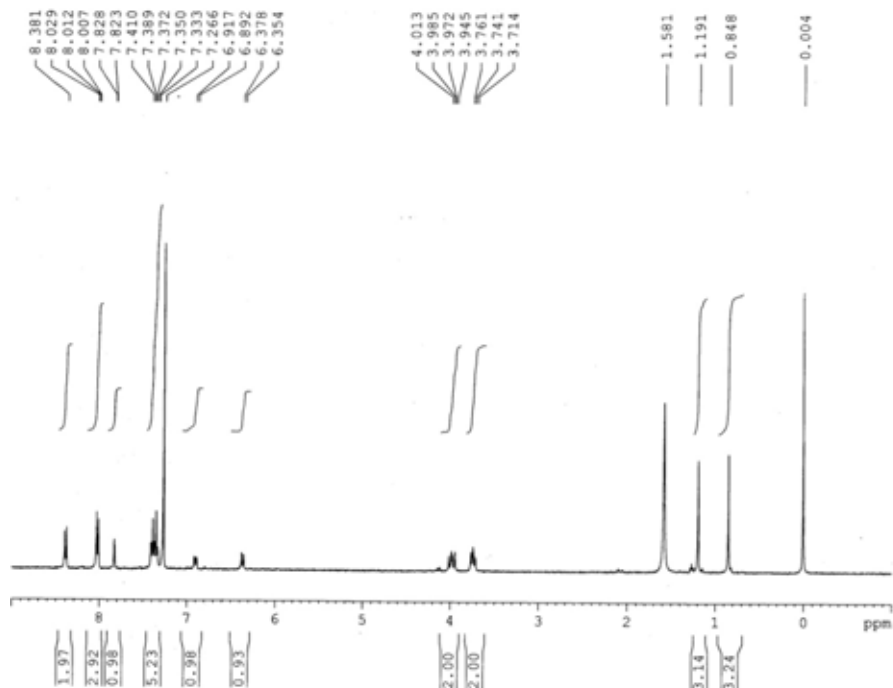

Figure S53a.  $^1\text{H}$  NMR spectrum of compound (Z)-41

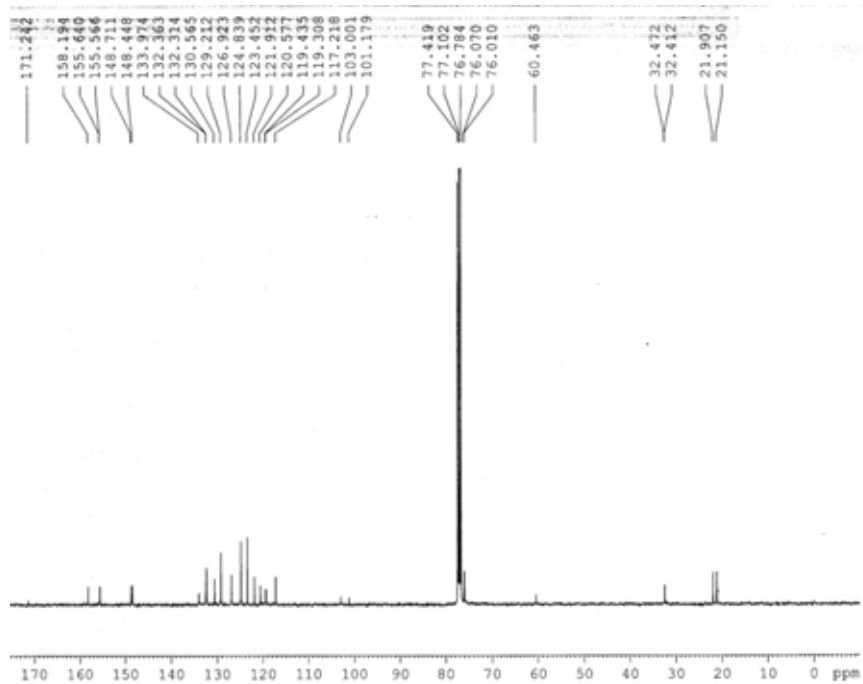

Figure S53b.  $^{13}\text{C}$  NMR spectrum of compound (Z)-41

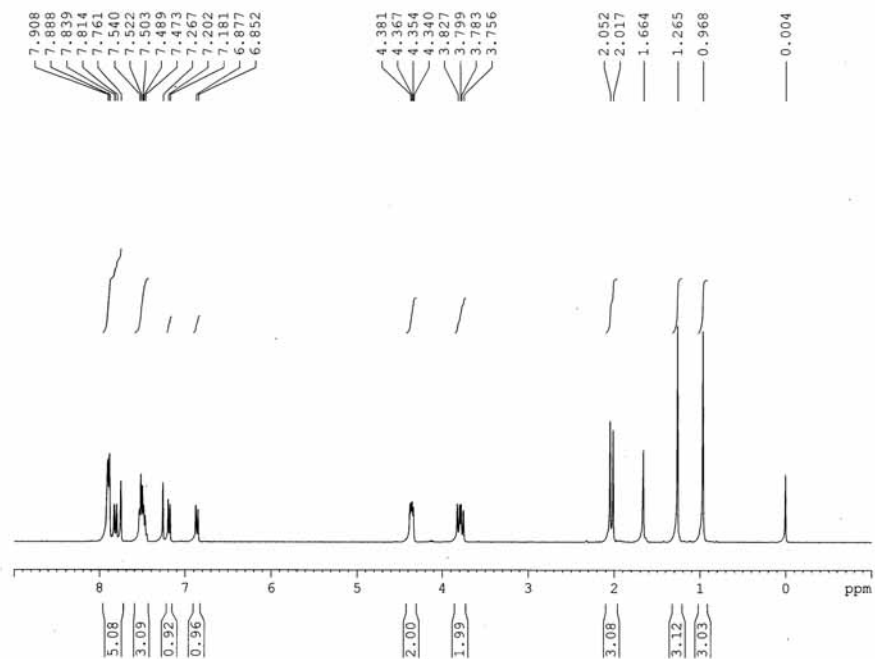

Figure S54a.  $^1\text{H}$  NMR spectrum of compound (*E*)-42

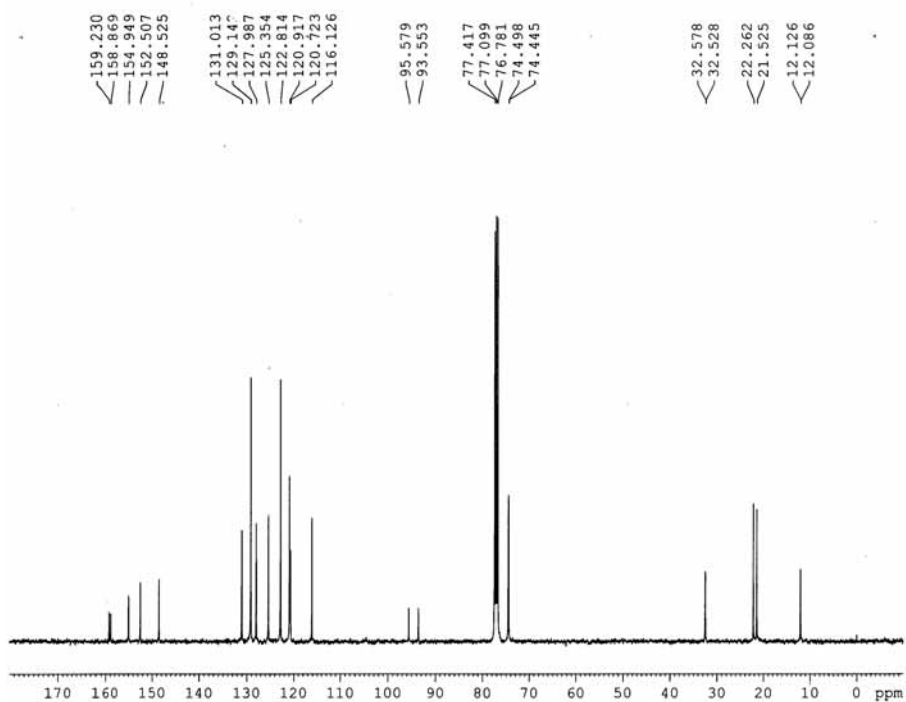

Figure S54b.  $^{13}\text{C}$  NMR spectrum of compound (*E*)-42

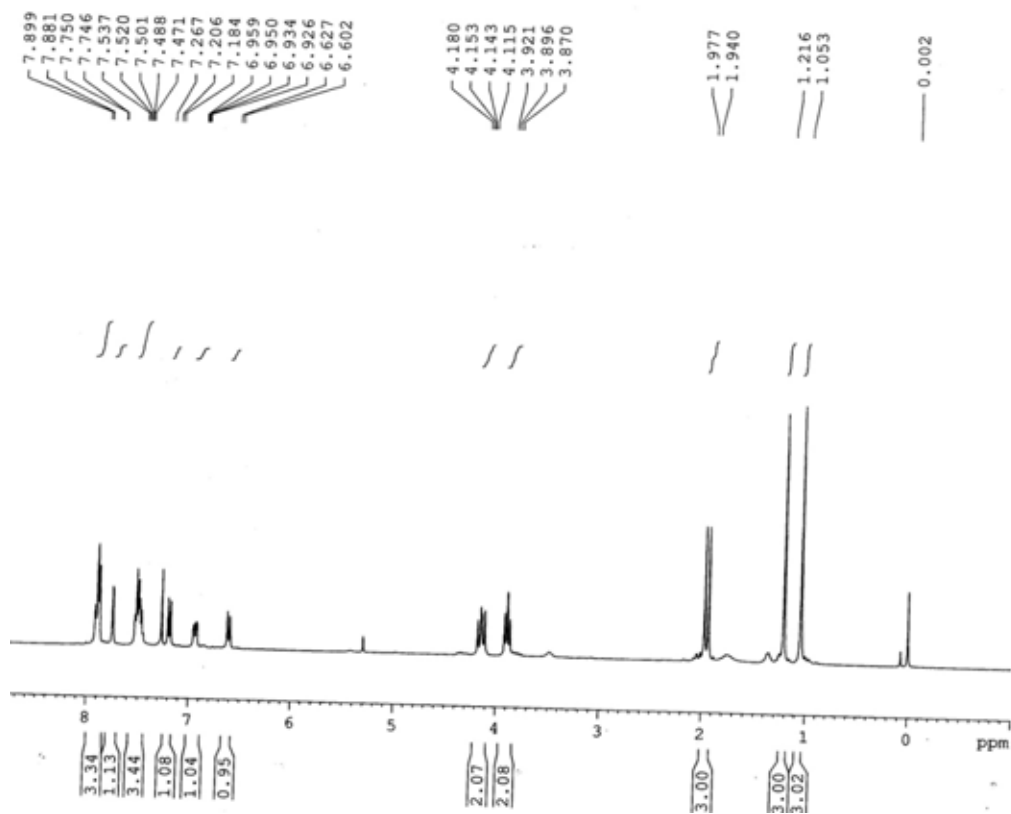

Figure S55a. <sup>1</sup>H NMR spectrum of compound (Z)-42

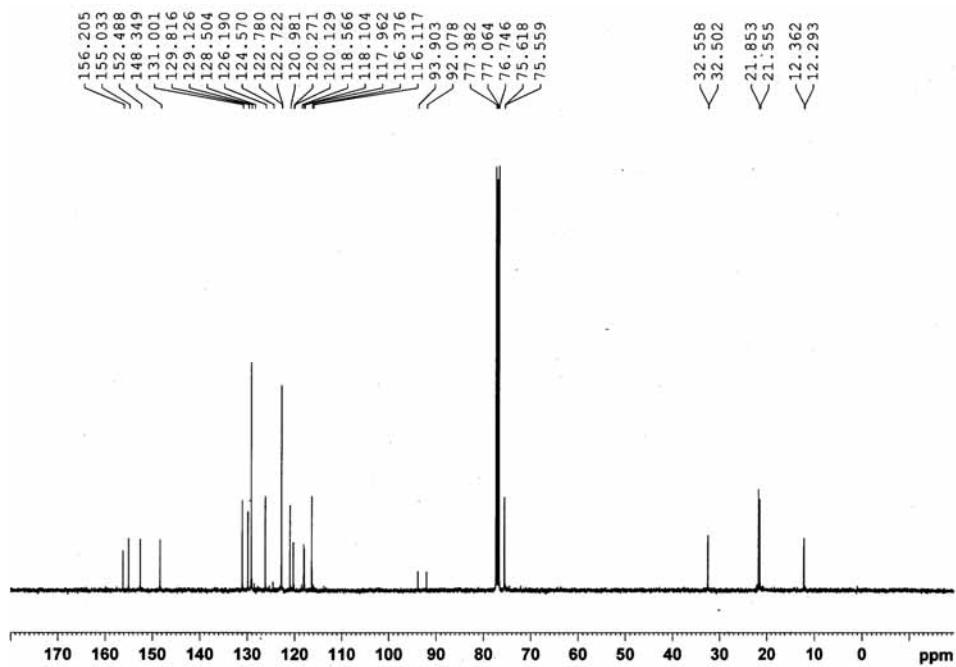

Figure S55b. <sup>13</sup>C NMR spectrum of compound (Z)-42



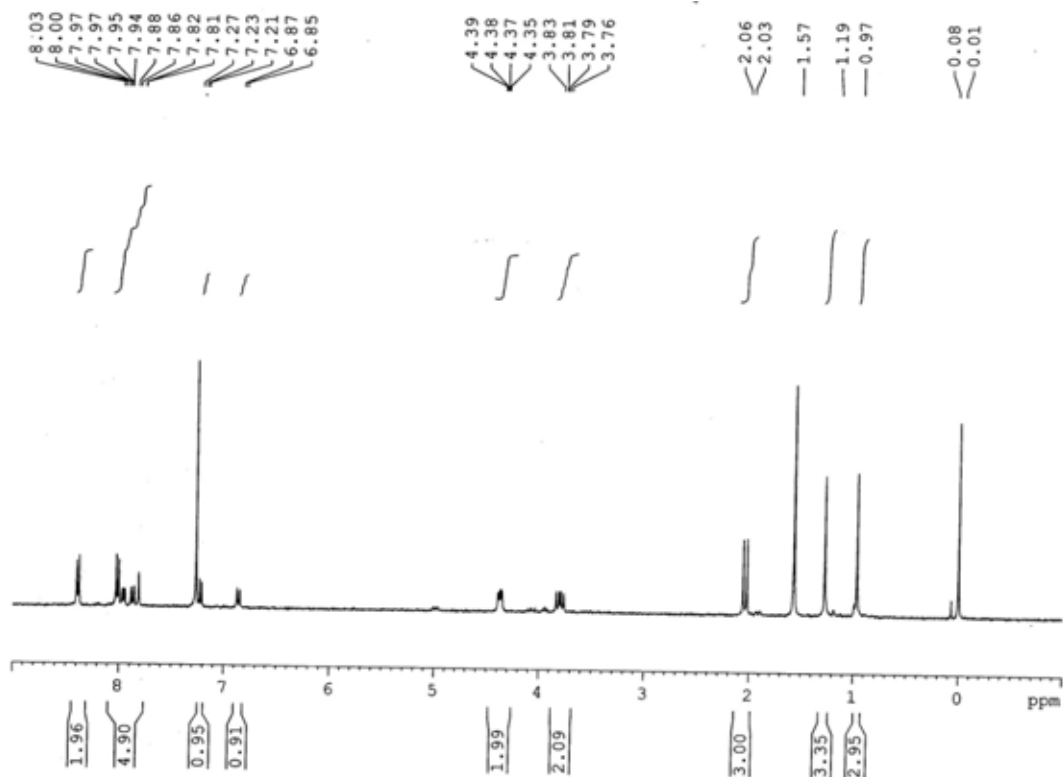

Figure S56a. <sup>1</sup>H NMR spectrum of compound (E)-43

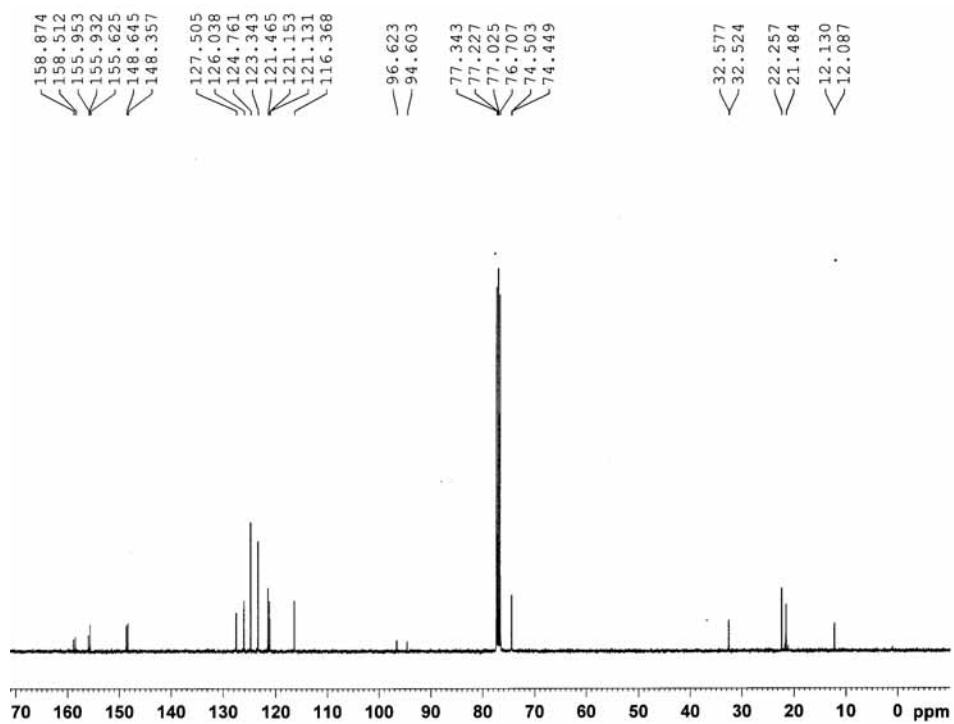

Figure S56b. <sup>13</sup>C NMR spectrum of compound (E)-43

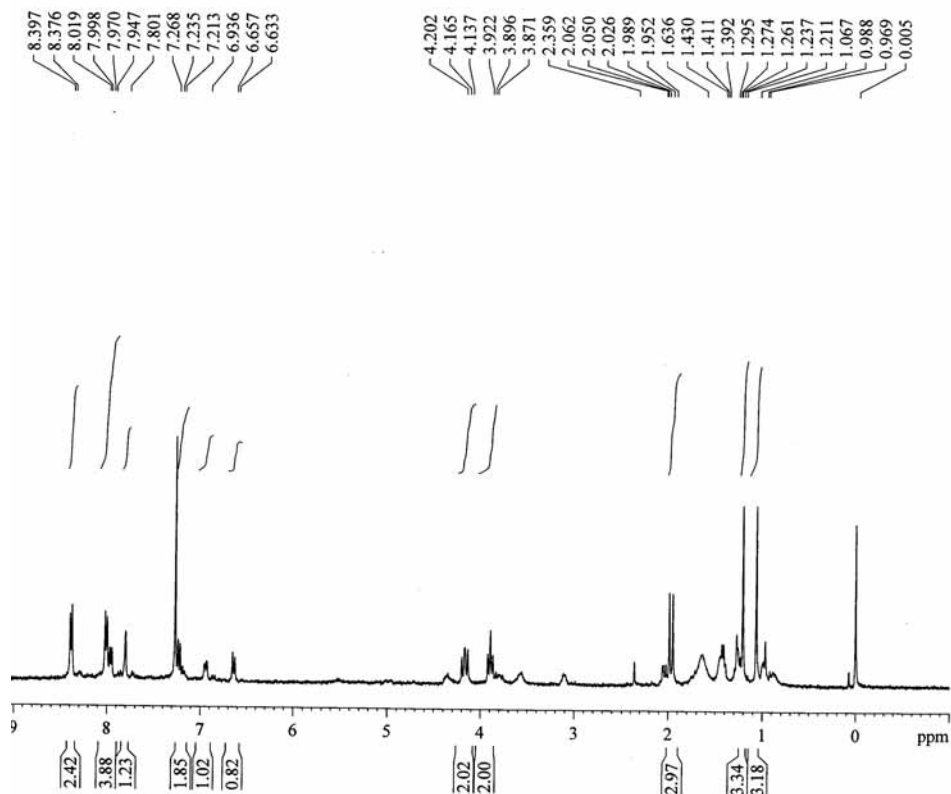

Figure S57a.  $^1\text{H}$  NMR spectrum of compound (Z)-43

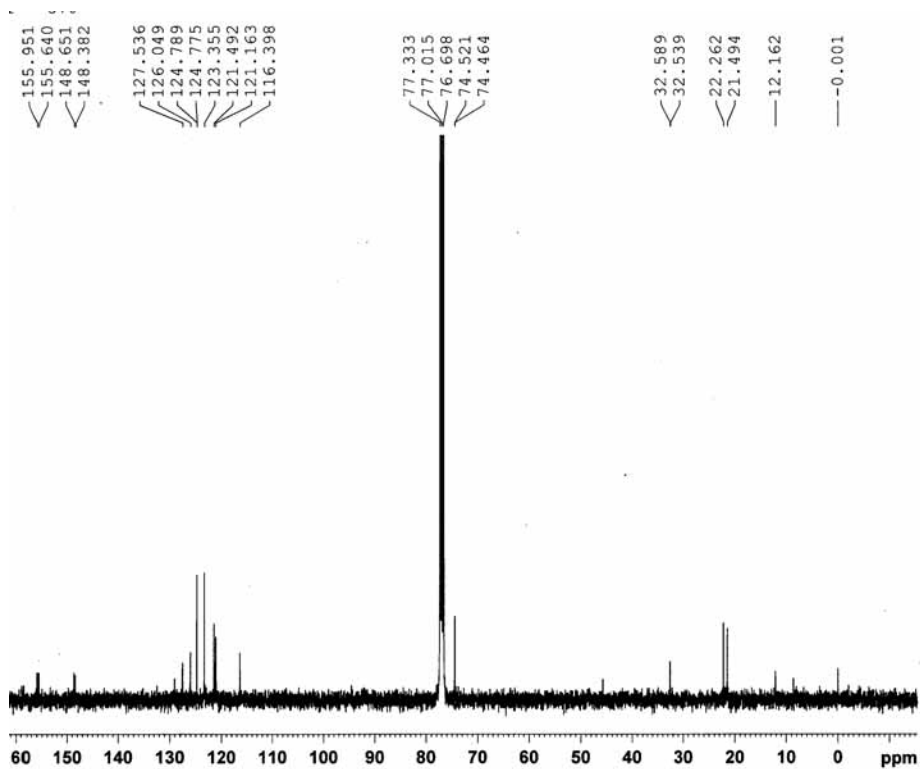

Figure S57b.  $^{13}\text{C}$  NMR spectrum of compound (Z)-43

## Reference

- (1) Perrin, D. D.; Armarego, W. L. F.; Perrin, D. R. *Purification of Laboratory Chemicals*; Pergamon: Oxford, UK, **1986**.
